# Supplementary material for: Ancestry-specific predisposing germline variants in cancer
Source: PubMed Central journal article supplement (PMC7260738; doi:10.1186/s13073-020-00744-3), 2020-05-29
Supplement: 13073_2020_744_MOESM1_ESM.pdf [file 13073_2020_744_MOESM1_ESM.pdf]

## UCSF PCA

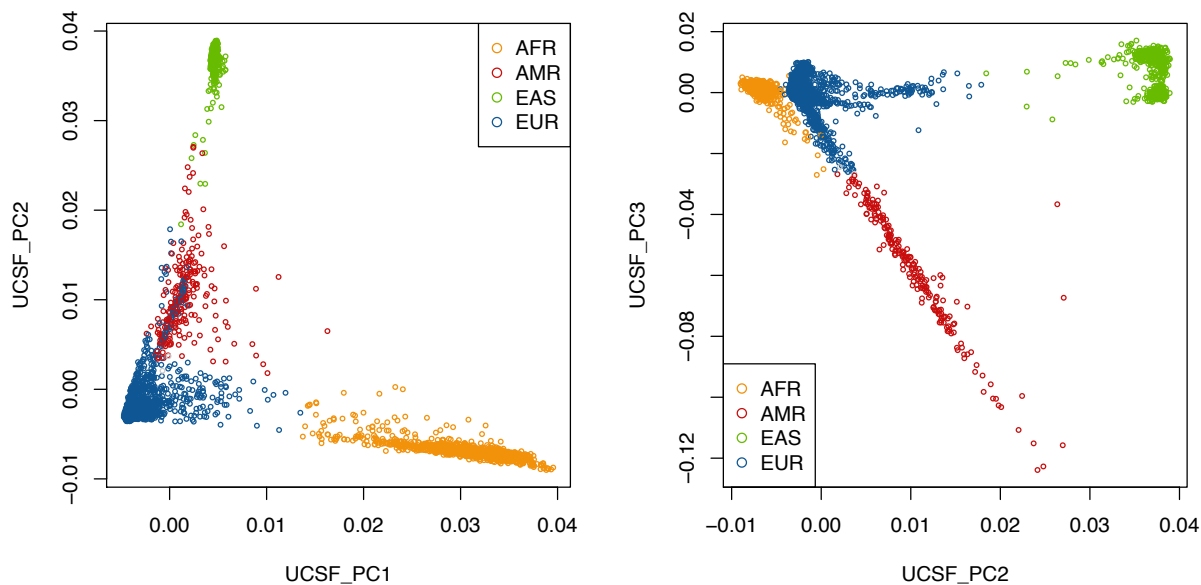

## WashU PCA

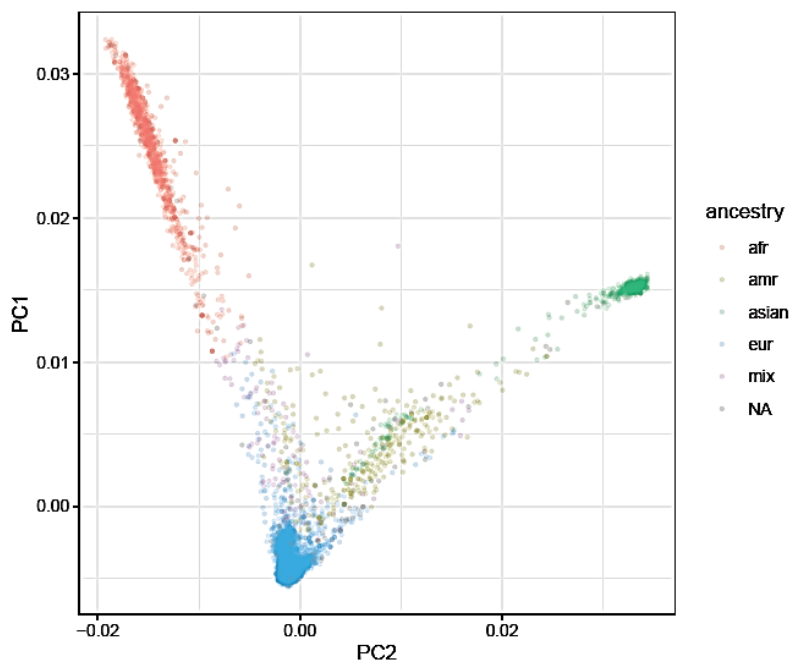

**Fig S1** Principal component analyses (PCA) of germline TCGA samples to infer genetic ancestry as performed by PanCanAtlas Ancestry Informative Markers (AIM) working group

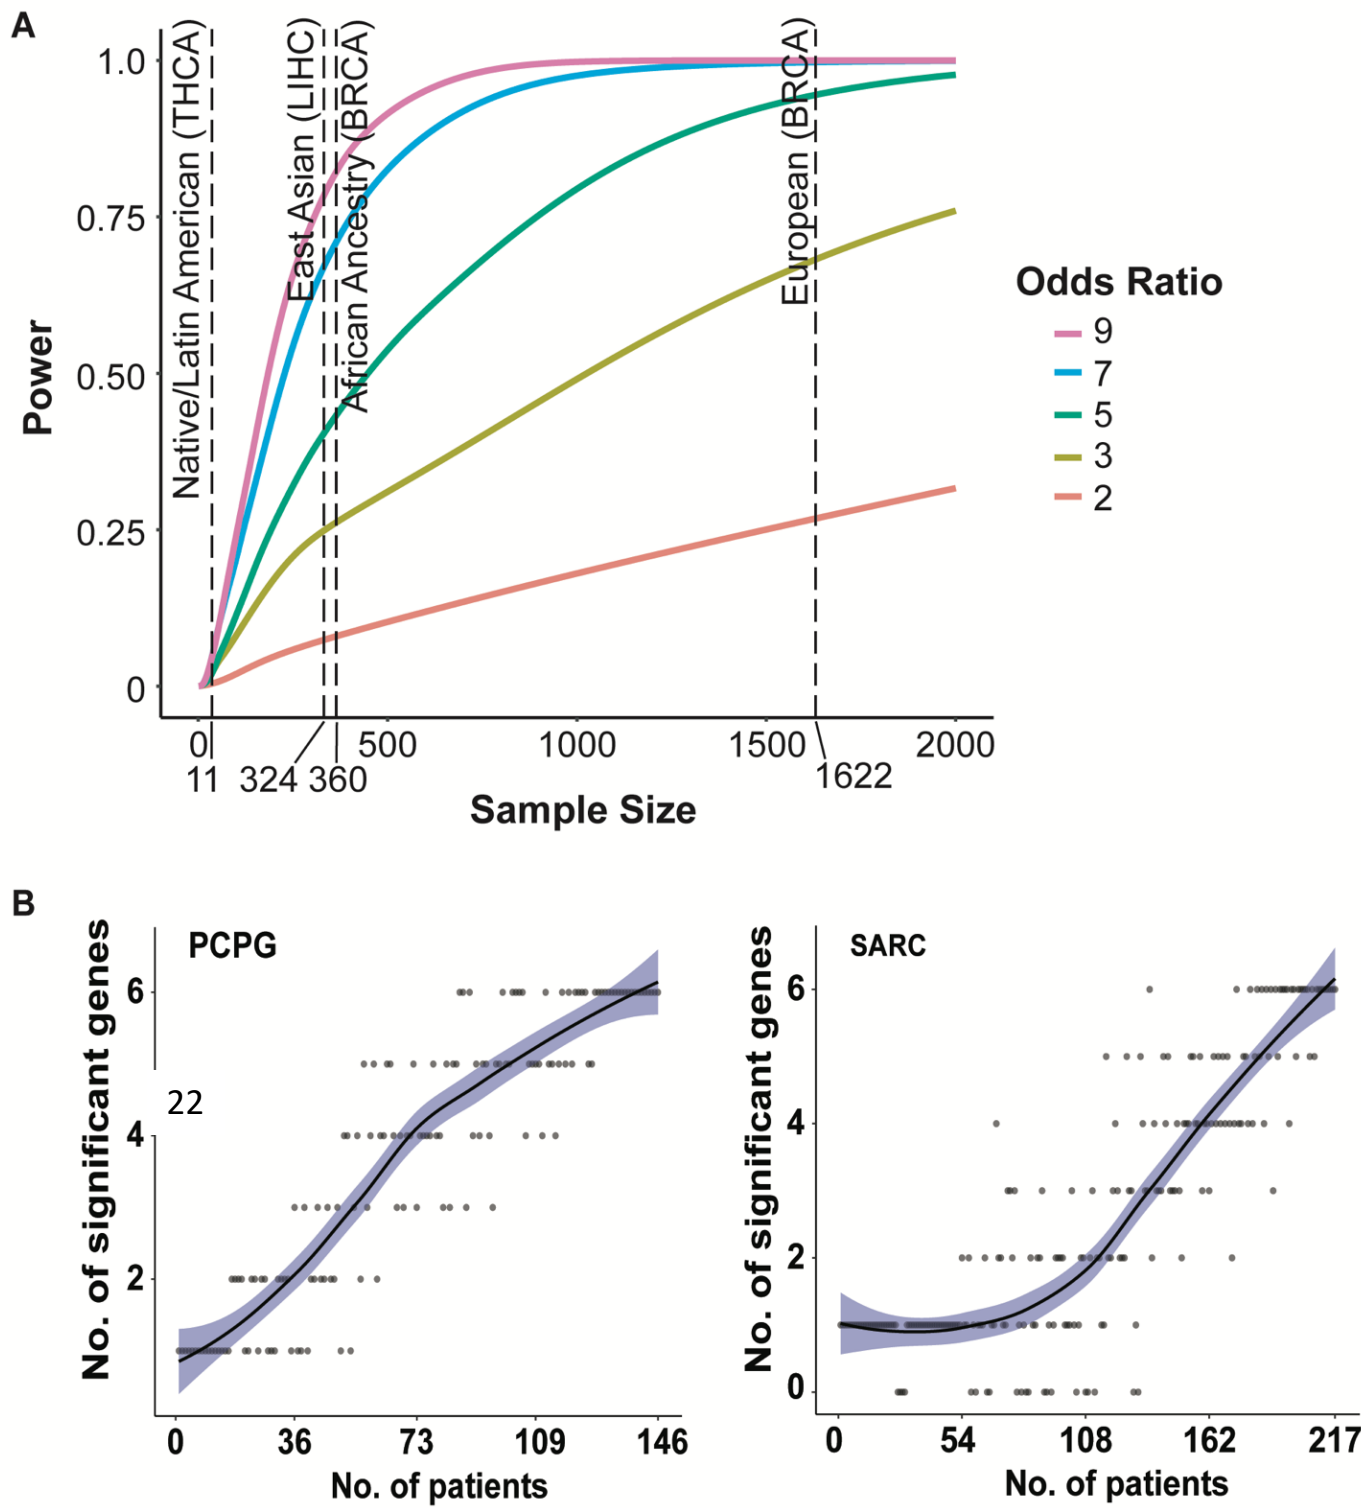

**Fig S2** Power analysis for ancestry-specific sample sizes to discover predisposing genes.

**A.** The number of samples required to detect rare variant associations with varying effect sizes (OR = 2,3,5,7,9) at corresponding statistical power. The total number of samples assumes an equal number of cases and controls (e.g. For 811 TCGA-BRCA-EUR samples, n=1,622). Cancer types with the largest cohort sizes for each of the studied ancestries in TCGA are shown by a dotted line.

**B.** Down-sampling analysis to identify counts of significantly associated predisposing genes at different sample sizes by incrementally increasing the sample size from zero to the current cohort sizes.

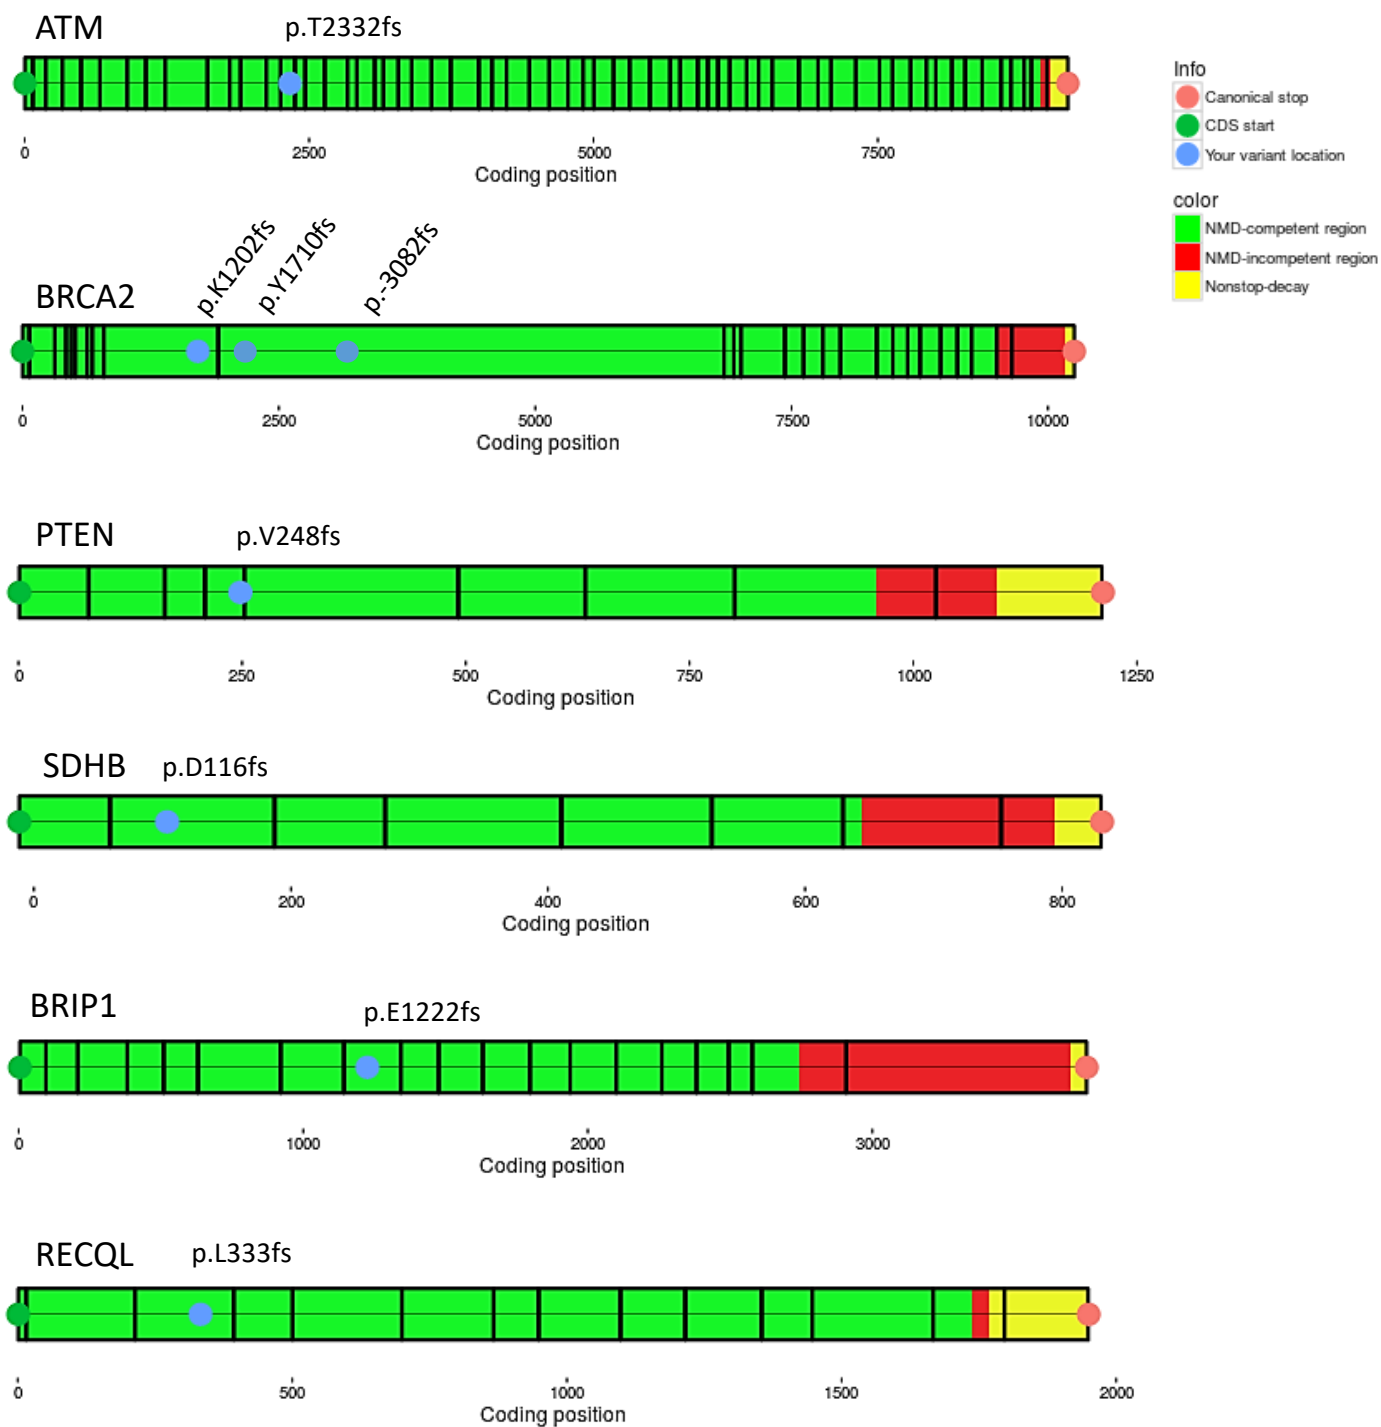

**Fig S3** Nonsense-mediated decay prediction for predisposing frameshift variants in African and East Asian ancestries.
