# Supplementary material for: Ancestry-specific predisposing germline variants in cancer
Source: Genome Med. 2020 May 29;12:51. doi: 10.1186/s13073-020-00744-3 (PMC7260738; doi:10.1186/s13073-020-00744-3)
Supplement: Supplementary file 2 — Additional file 2: Table S1. The demographic information of TCGA PanCanAtlas cohort with separate admixture populations. Table S2a. Ancestry-specific cancer-gene associations discovered from multivariate regression analyses. Table S2b. Ancestry-specific cancer-gene associations discovered from rare variant burden testing (Total Frequency Test- TFT). Table S3. Frequency of predisposing variants in TCGA PanCanAtlas and gnomAD-non-cancer subset across all ancestries. Table S4a. Ancestry-Specific Predisposing Variants as identified from Supp. Table.2. Table S4b. Summary of somatic second hit mutations in carriers of germline predisposing variants. Table S5a. Statistical analysis of gene expression in tumor samples of the variant carriers vs. non-carriers within each ancestry-cancer combination. Table S5b. Tumor RNAseq variant allele fractions and the somatic second hit events in germline predisposing variants with extreme expression within that cancer type. Table S6a. Post hoc power analyses to detect rare-variant associations in an aggregation test using SKAT. Table S6a. Down-sampling analysis for PCGP and SARC (cancers with at least 5 significantly associated germline genes in the European ancestry). Table S7. Prior studies that report ancestry-specific germline predisposition. [file 13073_2020_744_MOESM2_ESM.xlsx]

## Sheet: Description of Tables S1-S7
Table S1. The demographic information of TCGA PanCanAtlas cohort with separate admixture populations
Table S2a. Ancestry-specific cancer-gene associations discovered from multivariate regression analyses.
Table S2b. Ancestry-specific cancer-gene associations discovered from rare variant burden testing (Total Frequency Test- TFT).
Table S3. Frequency of predisposing variants in TCGA PanCanAtlas and gnomAD-non-cancer subset across all ancestries.
Table S4a. Ancestry-Specific Predisposing Variants as identified from Supp. Table.2
Table S4b. Summary of somatic second hit mutations in carriers of germline predisposing variants.
Table S5a. Statistical analysis of gene expression in tumor samples of the variant carriers vs. non-carriers within each ancestry-cancer combination
Table S5b. Tumor RNAseq variant allele fractions and the somatic second hit events in germline predisposing variants with extreme expression within that cancer type.
Table S6a. Post hoc power analyses to detect rare-variant associations in an aggregation test using SKAT.
Table S6a. Down-sampling analysis for PCGP and SARC (cancers with at least 5 significantly associated germline genes in the European ancestry).
Table S7. Prior studies that report ancestry-specific germline predisposition.

## Sheet: S1.DemographicsAdmix
	Cancer	admix	afr	afr_admix	amr	eas	eas_admix	eur	eur_admix	sas	sas_admix	Total
Total Number (%)		11 (0.11%)	631 (6.37%)	335 (3.38%)	41 (0.41%)	643 (6.5%)	6 (0.06%)	8120 (82.03%)	64 (0.65%)	26 (0.26%)	22 (0.22%)	9899 (100%)
ACC	Adrenocortical Carcinoma	0	0	2	0	2	0	81	1	0	0	86
BLCA	Bladder Urothelial Carcinoma	0	14	7	1	43	0	328	1	1	1	396
BRCA	Breast Invasive Carcinoma	1	124	56	5	52	1	808	3	4	4	1058
CESC	Cervical Squamous Cell Carcinoma and Endocervical Adenocarcinoma	0	19	12	1	21	1	193	15	0	0	262
CHOL	Cholangiocarcinoma	0	2	0	0	2	0	29	1	0	0	34
COAD	Colon Adenocarcinoma	0	44	14	0	12	0	341	2	0	0	413
DLBC	Lymphoid Neoplasm Diffuse Large B-cell Lymphoma	0	0	0	0	14	1	23	0	1	0	39
ESCA	Esophageal Carcinoma	0	3	1	0	44	0	122	4	0	0	174
GBM	Glioblastoma Multiforme	0	21	16	0	2	0	288	4	0	1	332
HNSC	Head and Neck Squamous Cell Carcinoma	1	38	12	6	6	1	435	4	3	2	508
KICH	Kidney Chromophobe	0	3	1	0	1	0	56	0	0	1	62
KIRC	Kidney Renal Clear Cell Carcinoma	0	31	23	2	6	1	301	5	0	1	370
KIRP	Kidney Renal Papillary Cell Carcinoma	0	43	20	0	6	0	206	1	1	0	277
LAML	Acute Myeloid Leukemia	0	14	0	0	2	0	125	0	0	0	141
LGG	Brain Lower Grade Glioma	0	15	8	4	10	0	448	7	1	2	495
LIHC	Liver Hepatocellular Carcinoma	1	14	4	0	162	0	176	3	0	1	361
LUAD	Lung Adenocarcinoma	0	34	18	1	9	0	416	0	0	0	478
LUSC	Lung Squamous Cell Carcinoma	0	15	14	0	11	0	452	3	0	0	495
MESO	Mesothelioma	0	0	0	0	0	0	78	0	0	1	79
OV	Ovarian Serous Cystadenocarcinoma	0	21	9	1	7	0	348	0	1	4	391
PAAD	Pancreatic Adenocarcinoma	1	6	3	0	11	0	158	0	0	0	179
PCPG	Pheochromocytoma and Paraganglioma	0	8	12	0	3	0	146	0	4	0	173
PRAD	Prostate Adenocarcinoma	1	38	21	0	9	0	409	2	0	2	482
READ	Rectum Adenocarcinoma	0	1	5	0	1	0	135	0	0	0	142
SARC	Sarcoma	2	12	6	0	6	0	216	1	0	0	243
SKCM	Skin Cutaneous Melanoma	0	1	0	2	12	0	448	0	0	0	463
STAD	Stomach Adenocarcinoma	0	8	7	0	90	0	294	0	0	0	399
TGCT	Testicular Germ Cell Tumors	0	1	3	0	3	0	106	1	0	0	114
THCA	Thyroid Carcinoma	3	21	12	11	52	0	358	1	9	2	469
THYM	Thymoma	0	4	4	0	12	0	92	4	0	0	116
UCEC	Uterine Corpus Endometrial Carcinoma	1	72	40	7	29	1	381	1	1	0	533
UCS	Uterine Carcinosarcoma	0	4	5	0	3	0	43	0	0	0	55
UVM	Uveal Melanoma	0	0	0	0	0	0	80	0	0	0	80
	Samples >20	0	11	4	0	8	0	33	0	0	0

## Sheet: S2a.Association (Regression)
Ancestry	Cancer	Gene	gene_path_count	pvalue_Walds	covariants	OR	OR_lower_bound95	OR_higher_bound95	conf_int95	FDR_chisq	FDR_walds	y	y_type	gene	degrees_freedom	deviance	residual_degrees_freedom	residual_deviance	pvalue_chisq	xi_lvl1	beta_coefficient	StdErr	Zvalue	NA	NA	NA	NA	NA	NA
European	OV	BRCA1	30	7.71156e-22	age_at_initial_pathologic_diagnosis+gender+PC1+PC2	14.5648	8.43124	25.1602	8.43124493248572-25.1602445916675	1.03786e-20	8.79118e-20	inCancer	Binary	HUGO_Symbol	1	96.4605	7928	2735.18	9.10403e-23	HUGO_SymbolWT	-2.6786	0.278913	-9.60371	14.5648	8.43124	25.1602	8.43124493248568-25.1602445916674	1.03786e-20	8.79118e-20
European	OV	BRCA2	22	2.41107e-14	age_at_initial_pathologic_diagnosis+gender+PC1+PC2	10.353	5.6781	18.8769	5.67809650754657-18.8769077609746	1.0123e-11	1.37431e-12	inCancer	Binary	HUGO_Symbol	1	54.2382	7928	2777.4	1.77597e-13	HUGO_SymbolWT	-2.33728	0.306466	-7.62656	10.353	5.6781	18.8769	5.67809650754655-18.8769077609745	1.0123e-11	1.37431e-12
European	PCPG	RET	7	3.16639e-09	age_at_initial_pathologic_diagnosis+gender+PC1+PC2	26.8136	9.02985	79.6214	9.02984755640904-79.6213629805591	1.85379e-07	1.20323e-07	inCancer	Binary	HUGO_Symbol	1	33.6776	7928	1414.14	6.50453e-09	HUGO_SymbolWT	-3.28891	0.555303	-5.92273	26.8136	9.02985	79.6214	9.029847556409-79.6213629805588	1.85379e-07	1.20323e-07
European	SARC	NF1	5	2.61111e-08	age_at_initial_pathologic_diagnosis+gender+PC1+PC2	24.5424	7.95163	75.7489	7.95162874576242-75.7489280150693	0.000218503	7.44165e-07	inCancer	Binary	HUGO_Symbol	1	18.4711	7928	1949.82	1.72502e-05	HUGO_SymbolWT	-3.2004	0.575023	-5.56569	24.5424	7.95163	75.7489	7.95162874576238-75.7489280150691	0.000218503	7.44165e-07
European	PCPG	VHL	6	4.61283e-08	age_at_initial_pathologic_diagnosis+gender+PC1+PC2	51.6366	12.5514	212.433	12.5514415027087-212.432707977834	1.28632e-07	1.05173e-06	inCancer	Binary	HUGO_Symbol	1	34.9487	7928	1412.87	3.38506e-09	HUGO_SymbolWT	-3.94423	0.721643	-5.46562	51.6366	12.5514	212.433	12.5514415027087-212.432707977833	1.28632e-07	1.05173e-06
European	PCPG	NF1	5	5.79218e-07	age_at_initial_pathologic_diagnosis+gender+PC1+PC2	20.6402	6.29726	67.6514	6.29725886525491-67.651384106443	4.29363e-05	1.10051e-05	inCancer	Binary	HUGO_Symbol	1	22.2598	7928	1425.56	2.38135e-06	HUGO_SymbolWT	-3.02724	0.605688	-4.99802	20.6402	6.29726	67.6514	6.2972588652549-67.6513841064428	4.29363e-05	1.10051e-05
European	PCPG	SDHB	4	6.64707e-05	age_at_initial_pathologic_diagnosis+gender+PC1+PC2	104.172	10.6228	1021.56	10.6228210727952-1021.55707879249	4.28218e-06	0.00108252	inCancer	Binary	HUGO_Symbol	1	27.1546	7928	1420.66	1.87815e-07	HUGO_SymbolWT	-4.64604	1.16484	-3.98858	104.172	10.6228	1021.56	10.6228210727952-1021.55707879249	4.28218e-06	0.00108252
African American	LUSC	BRCA2	2	0.00012795	age_at_initial_pathologic_diagnosis+gender+PC1+PC2	41.1443	6.14162	275.636	6.14162402240958-275.636410653788	0.0641763	0.00182328	inCancer	Binary	HUGO_Symbol	1	5.99197	944	253.237	0.0143712	HUGO_SymbolWT	-3.71709	0.970424	-3.83037	41.1443	6.14162	275.636	6.14162402240957-275.636410653787	0.0641763	0.00182328
European	LIHC	BAP1	2	0.000149961	age_at_initial_pathologic_diagnosis+gender+PC1+PC2	28.0601	5.0055	157.301	5.00549613807229-157.301177536631	0.0306157	0.00189951	inCancer	Binary	HUGO_Symbol	1	7.75003	7928	1695.82	0.00537118	HUGO_SymbolWT	-3.33435	0.879513	-3.79113	28.0601	5.0055	157.301	5.00549613807228-157.301177536631	0.0306157	0.00189951
European	SARC	APC	2	0.00021068	age_at_initial_pathologic_diagnosis+gender+PC1+PC2	103.006	8.87755	1195.18	8.87755294869642-1195.1779799669	0.00717234	0.00240176	inCancer	Binary	HUGO_Symbol	1	10.7031	7928	1957.59	0.00106956	HUGO_SymbolWT	-4.63479	1.25067	-3.70585	103.006	8.87755	1195.18	8.87755294869631-1195.17797996691	0.00717234	0.00240176
European	PCPG	SDHD	3	0.00029337	age_at_initial_pathologic_diagnosis+gender+PC1+PC2	74.7235	7.23472	771.778	7.23472081337698-771.778373545711	0.000135412	0.00304038	inCancer	Binary	HUGO_Symbol	1	19.6089	7928	1428.21	9.50262e-06	HUGO_SymbolWT	-4.31379	1.1913	-3.62109	74.7235	7.23472	771.778	7.23472081337707-771.778373545709	0.000135412	0.00304038
European	COAD	MLH1	2	0.00033194	age_at_initial_pathologic_diagnosis+gender+PC1+PC2	45.6262	5.66388	367.549	5.66388102229534-367.548645430159	0.0333604	0.00315343	inCancer	Binary	HUGO_Symbol	1	7.50718	7928	2654.82	0.00614534	HUGO_SymbolWT	-3.82048	1.0645	-3.58901	45.6262	5.66388	367.549	5.66388102229535-367.548645430159	0.0333604	0.00315343
European	PAAD	ATM	4	0.000924394	age_at_initial_pathologic_diagnosis+gender+PC1+PC2	5.91787	2.06679	16.9447	2.06678958283766-16.9447461027712	0.0518065	0.00810622	inCancer	Binary	HUGO_Symbol	1	6.55616	7928	1504.55	0.0104522	HUGO_SymbolWT	-1.77798	0.536735	-3.31258	5.91787	2.06679	16.9447	2.06678958283766-16.9447461027712	0.0518065	0.00810622
European	SKCM	SDHA	3	0.00114912	age_at_initial_pathologic_diagnosis+gender+PC1+PC2	14.9394	2.92683	76.2551	2.92683332343779-76.2550686568838	0.0130782	0.00935715	inCancer	Binary	HUGO_Symbol	1	9.3917	7928	3390.37	0.0021797	HUGO_SymbolWT	-2.704	0.831689	-3.25122	14.9394	2.92683	76.2551	2.92683332343778-76.2550686568837	0.0130782	0.00935715
European	UCEC	MSH6	4	0.00124421	age_at_initial_pathologic_diagnosis+gender+PC1+PC2	38.1211	4.18102	347.575	4.18102237896979-347.575400143008	0.00684287	0.00945599	inCancer	Binary	HUGO_Symbol	1	10.9024	7928	2949.35	0.000960403	HUGO_SymbolWT	-3.64077	1.12768	-3.22855	38.1211	4.18102	347.575	4.18102237896979-347.575400143009	0.00684287	0.00945599
European	SARC	TP53	3	0.0019309	age_at_initial_pathologic_diagnosis+gender+PC1+PC2	12.8981	2.56183	64.9388	2.5618267433127-64.938831020829	0.0641763	0.0137577	inCancer	Binary	HUGO_Symbol	1	5.79599	7928	1962.5	0.0160627	HUGO_SymbolWT	-2.55708	0.82469	-3.10066	12.8981	2.56183	64.9388	2.56182674331268-64.9388310208287	0.0641763	0.0137577
European	KIRC	BAP1	2	0.00276532	age_at_initial_pathologic_diagnosis+gender+PC1+PC2	14.1154	2.49309	79.9184	2.49309473483255-79.9184154868243	0.0641763	0.0181869	inCancer	Binary	HUGO_Symbol	1	5.76747	7928	2553.98	0.0163255	HUGO_SymbolWT	-2.64727	0.884578	-2.99269	14.1154	2.49309	79.9184	2.49309473483256-79.9184154868245	0.0641763	0.0181869
European	GBM	BUB1B	2	0.00287162	age_at_initial_pathologic_diagnosis+gender+PC1+PC2	12.7103	2.38906	67.6213	2.3890626640981-67.6213312033221	0.071295	0.0181869	inCancer	Binary	HUGO_Symbol	1	5.30507	7928	2450.1	0.0212634	HUGO_SymbolWT	-2.54241	0.852828	-2.98116	12.7103	2.38906	67.6213	2.3890626640981-67.6213312033219	0.071295	0.0181869
European	LUAD	ATM	6	0.00473858	age_at_initial_pathologic_diagnosis+gender+PC1+PC2	3.54975	1.4736	8.55101	1.47359589481017-8.55100903696539	0.0727159	0.0273307	inCancer	Binary	HUGO_Symbol	1	5.12373	7928	3116.77	0.0236008	HUGO_SymbolWT	-1.26688	0.448565	-2.82429	3.54975	1.4736	8.55101	1.47359589481017-8.55100903696534	0.0727159	0.0273307
European	LIHC	MSH6	2	0.00484819	age_at_initial_pathologic_diagnosis+gender+PC1+PC2	9.34631	1.97375	44.2575	1.97375414655791-44.2575234274752	0.0722774	0.0273307	inCancer	Binary	HUGO_Symbol	1	5.18182	7928	1698.39	0.0228244	HUGO_SymbolWT	-2.23498	0.793404	-2.81695	9.34631	1.97375	44.2575	1.97375414655791-44.257523427475	0.0722774	0.0273307
European	SARC	MSH2	2	0.00520677	age_at_initial_pathologic_diagnosis+gender+PC1+PC2	9.32	1.94701	44.6131	1.94701394321625-44.6131366728889	0.0808588	0.0273307	inCancer	Binary	HUGO_Symbol	1	4.89382	7928	1963.4	0.0269529	HUGO_SymbolWT	-2.23216	0.798926	-2.79395	9.32	1.94701	44.6131	1.94701394321625-44.6131366728889	0.0808588	0.0273307
European	SARC	FAH	2	0.00561891	age_at_initial_pathologic_diagnosis+gender+PC1+PC2	9.53018	1.93254	46.9975	1.93253561896786-46.9975350378655	0.071295	0.0273307	inCancer	Binary	HUGO_Symbol	1	5.3129	7928	1962.98	0.0211681	HUGO_SymbolWT	-2.25446	0.814112	-2.76923	9.53018	1.93254	46.9975	1.93253561896786-46.9975350378655	0.071295	0.0273307
European	PCPG	MAX	2	0.00579347	age_at_initial_pathologic_diagnosis+gender+PC1+PC2	21.3951	2.42861	188.483	2.42861180877317-188.482800250092	0.00731275	0.0273307	inCancer	Binary	HUGO_Symbol	1	10.5615	7928	1437.26	0.00115464	HUGO_SymbolWT	-3.06316	1.11014	-2.75925	21.3951	2.42861	188.483	2.42861180877319-188.482800250092	0.00731275	0.0273307
European	HNSC	COL7A1	4	0.00588152	age_at_initial_pathologic_diagnosis+gender+PC1+PC2	4.8858	1.58012	15.1071	1.58012178640831-15.107080574353	0.0722774	0.0273307	inCancer	Binary	HUGO_Symbol	1	5.22268	7928	3291.7	0.0222941	HUGO_SymbolWT	-1.58633	0.575945	-2.75431	4.8858	1.58012	15.1071	1.58012178640831-15.107080574353	0.0722774	0.0273307
European	STAD	PALB2	3	0.00599358	age_at_initial_pathologic_diagnosis+gender+PC1+PC2	6.5645	1.71544	25.1205	1.71543627227224-25.1205039585182	0.071295	0.0273307	inCancer	Binary	HUGO_Symbol	1	5.39127	7928	2363.87	0.0202377	HUGO_SymbolWT	-1.88168	0.684711	-2.74813	6.5645	1.71544	25.1205	1.71543627227224-25.1205039585182	0.071295	0.0273307
European	COAD	MSH2	2	0.00681727	age_at_initial_pathologic_diagnosis+gender+PC1+PC2	8.8925	1.82621	43.3008	1.82621460309225-43.3008373805338	0.139298	0.0287986	inCancer	Binary	HUGO_Symbol	1	3.53115	7928	2658.79	0.0602261	HUGO_SymbolWT	-2.18521	0.807649	-2.70564	8.8925	1.82621	43.3008	1.82621460309224-43.3008373805337	0.139298	0.0287986
European	KIRP	GJB2	2	0.00682072	age_at_initial_pathologic_diagnosis+gender+PC1+PC2	9.14881	1.84039	45.4799	1.84038890197177-45.4798838560619	0.0866911	0.0287986	inCancer	Binary	HUGO_Symbol	1	4.72904	7928	1876.82	0.0296575	HUGO_SymbolWT	-2.21362	0.818202	-2.70547	9.14881	1.84039	45.4799	1.84038890197177-45.4798838560619	0.0866911	0.0287986
European	BRCA	BRCA2	16	0.0089305	age_at_initial_pathologic_diagnosis+gender+PC1+PC2	2.28302	1.22963	4.23885	1.22962719705689-4.23884748299163	0.00684287	0.0363599	inCancer	Binary	HUGO_Symbol	1	10.9182	7928	5197.43	0.00095226	HUGO_SymbolWT	-0.825501	0.315715	-2.6147	2.28302	1.22963	4.23885	1.22962719705689-4.23884748299164	0.00684287	0.0363599
European	THCA	TMEM127	2	0.00965151	age_at_initial_pathologic_diagnosis+gender+PC1+PC2	14.2031	1.90404	105.948	1.90403830382711-105.947964001864	0.0641763	0.0371954	inCancer	Binary	HUGO_Symbol	1	5.97917	7928	2893.35	0.0144758	HUGO_SymbolWT	-2.65346	1.02527	-2.58807	14.2031	1.90404	105.948	1.90403830382712-105.947964001862	0.0641763	0.0371954
European	PAAD	BRCA2	4	0.00978826	age_at_initial_pathologic_diagnosis+gender+PC1+PC2	3.91329	1.38984	11.0185	1.38983533946569-11.0184524875621	0.127328	0.0371954	inCancer	Binary	HUGO_Symbol	1	3.87043	7928	1507.24	0.049144	HUGO_SymbolWT	-1.36438	0.528169	-2.58322	3.91329	1.38984	11.0185	1.38983533946569-11.0184524875621	0.127328	0.0371954
European	ESCA	BRIP1	2	0.0102933	age_at_initial_pathologic_diagnosis+gender+PC1+PC2	7.18006	1.59277	32.3671	1.59276880221024-32.3670573347861	0.119329	0.037853	inCancer	Binary	HUGO_Symbol	1	4.01827	7928	1281.52	0.0450099	HUGO_SymbolWT	-1.97131	0.768297	-2.56582	7.18006	1.59277	32.3671	1.59276880221025-32.3670573347862	0.119329	0.037853
East Asian	STAD	BRIP1	2	0.0109518	age_at_initial_pathologic_diagnosis+gender+PC1+PC2	12.7692	1.79483	90.8451	1.79483169589195-90.8451481088198	0.237013	0.0383912	inCancer	Binary	HUGO_Symbol	1	2.23245	632	493.678	0.135139	HUGO_SymbolWT	-2.54703	1.0011	-2.54423	12.7692	1.79483	90.8451	1.79483169589195-90.8451481088199	0.237013	0.0383912
European	BLCA	RAD51C	2	0.0111133	age_at_initial_pathologic_diagnosis+gender+PC1+PC2	8.20848	1.61635	41.6859	1.6163534941327-41.6858568337612	0.143319	0.0383912	inCancer	Binary	HUGO_Symbol	1	3.42757	7928	2722.14	0.0641164	HUGO_SymbolWT	-2.10517	0.829094	-2.53912	8.20848	1.61635	41.6859	1.61635349413271-41.6858568337613	0.143319	0.0383912
European	OV	BRIP1	3	0.012875	age_at_initial_pathologic_diagnosis+gender+PC1+PC2	6.198	1.47212	26.0952	1.47212096971086-26.0951767490906	0.152553	0.0431691	inCancer	Binary	HUGO_Symbol	1	3.21159	7928	2828.43	0.0731186	HUGO_SymbolWT	-1.82423	0.733444	-2.48721	6.198	1.47212	26.0952	1.47212096971085-26.0951767490905	0.152553	0.0431691
European	BLCA	CHEK2	4	0.0133848	age_at_initial_pathologic_diagnosis+gender+PC1+PC2	4.30912	1.35419	13.7119	1.35419446397564-13.7118547412977	0.0679906	0.0435961	inCancer	Binary	HUGO_Symbol	1	5.59413	7928	2719.98	0.0180208	HUGO_SymbolWT	-1.46073	0.590586	-2.47336	4.30912	1.35419	13.7119	1.35419446397563-13.7118547412976	0.0679906	0.0435961
European	THCA	FAH	2	0.0139284	age_at_initial_pathologic_diagnosis+gender+PC1+PC2	8.13968	1.5305	43.2895	1.5304959541424-43.2895437157009	0.139298	0.0441065	inCancer	Binary	HUGO_Symbol	1	3.53919	7928	2895.79	0.0599348	HUGO_SymbolWT	-2.09675	0.852648	-2.45911	8.13968	1.5305	43.2895	1.5304959541424-43.2895437157007	0.139298	0.0441065
African American	OV	BRCA2	2	0.0146532	age_at_initial_pathologic_diagnosis+gender+PC1+PC2	8.50143	1.52448	47.4092	1.52447730171184-47.4092417936962	0.0641763	0.0451478	inCancer	Binary	HUGO_Symbol	1	5.86248	944	260.239	0.0154669	HUGO_SymbolWT	-2.14023	0.876844	-2.44084	8.50143	1.52448	47.4092	1.52447730171184-47.4092417936961	0.0641763	0.0451478
European	PAAD	COL7A1	2	0.0160585	age_at_initial_pathologic_diagnosis+gender+PC1+PC2	6.2533	1.40609	27.8103	1.40608976095506-27.8102572655238	0.139298	0.0481755	inCancer	Binary	HUGO_Symbol	1	3.5074	7928	1507.6	0.0610954	HUGO_SymbolWT	-1.83311	0.76139	-2.40758	6.2533	1.40609	27.8103	1.40608976095505-27.8102572655237	0.139298	0.0481755
European	KIRC	VHL	2	0.0168462	age_at_initial_pathologic_diagnosis+gender+PC1+PC2	6.87805	1.41482	33.4373	1.4148159059785-33.4373086598746	0.134414	0.0492428	inCancer	Binary	HUGO_Symbol	1	3.70538	7928	2556.04	0.0542374	HUGO_SymbolWT	-1.92834	0.806819	-2.39005	6.87805	1.41482	33.4373	1.4148159059785-33.4373086598746	0.134414	0.0492428
European	HNSC	RECQL	3	0.0186728	age_at_initial_pathologic_diagnosis+gender+PC1+PC2	4.90736	1.30362	18.4733	1.30362215917383-18.4732867990015	0.0878776	0.0532175	inCancer	Binary	HUGO_Symbol	1	4.66217	7928	3292.26	0.0308342	HUGO_SymbolWT	-1.59074	0.676334	-2.352	4.90736	1.30362	18.4733	1.30362215917382-18.4732867990015	0.0878776	0.0532175
European	KIRC	GJB2	2	0.021981	age_at_initial_pathologic_diagnosis+gender+PC1+PC2	6.13021	1.29926	28.9237	1.29925962293263-28.9237353849325	0.146501	0.0602844	inCancer	Binary	HUGO_Symbol	1	3.35933	7928	2556.39	0.0668251	HUGO_SymbolWT	-1.81323	0.791562	-2.2907	6.13021	1.29926	28.9237	1.29925962293263-28.9237353849324	0.146501	0.0602844
European	KIRP	PMS2	2	0.0222101	age_at_initial_pathologic_diagnosis+gender+PC1+PC2	6.09888	1.29484	28.7265	1.29484362205021-28.7265375731441	0.116395	0.0602844	inCancer	Binary	HUGO_Symbol	1	4.10004	7928	1877.45	0.0428823	HUGO_SymbolWT	-1.80811	0.790686	-2.28676	6.09888	1.29484	28.7265	1.29484362205021-28.7265375731441	0.116395	0.0602844
European	LUSC	BUB1B	2	0.0259264	age_at_initial_pathologic_diagnosis+gender+PC1+PC2	7.16104	1.26656	40.4882	1.26655609697476-40.4881697444941	0.134414	0.0687351	inCancer	Binary	HUGO_Symbol	1	3.73693	7928	3418.66	0.0532222	HUGO_SymbolWT	-1.96866	0.88387	-2.22731	7.16104	1.26656	40.4882	1.26655609697477-40.4881697444941	0.134414	0.0687351
European	LUSC	ATR	2	0.0330327	age_at_initial_pathologic_diagnosis+gender+PC1+PC2	6.13837	1.1574	32.5554	1.15739895203261-32.5553967131177	0.22342	0.0855847	inCancer	Binary	HUGO_Symbol	1	2.44914	7928	3419.95	0.117589	HUGO_SymbolWT	-1.81456	0.851232	-2.13169	6.13837	1.1574	32.5554	1.15739895203261-32.5553967131177	0.22342	0.0855847
European	PAAD	CHEK2	2	0.0348434	age_at_initial_pathologic_diagnosis+gender+PC1+PC2	4.93441	1.12033	21.7332	1.12033281591449-21.7332115020803	0.171492	0.0882699	inCancer	Binary	HUGO_Symbol	1	2.89682	7928	1508.21	0.0887544	HUGO_SymbolWT	-1.59623	0.756446	-2.11017	4.93441	1.12033	21.7332	1.1203328159145-21.7332115020803	0.171492	0.0882699
European	BLCA	BLM	2	0.0401244	age_at_initial_pathologic_diagnosis+gender+PC1+PC2	4.95001	1.07474	22.7986	1.0747441297283-22.798578449572	0.247456	0.0987305	inCancer	Binary	HUGO_Symbol	1	2.07453	7928	2723.5	0.149776	HUGO_SymbolWT	-1.59939	0.779253	-2.05247	4.95001	1.07474	22.7986	1.0747441297283-22.7985784495719	0.247456	0.0987305
European	TGCT	BRCA1	2	0.0413441	age_at_initial_pathologic_diagnosis+gender+PC1+PC2	8.26187	1.08644	62.8275	1.08644353367342-62.8275017572336	0.473939	0.0987305	inCancer	Binary	HUGO_Symbol	1	0.876295	7928	1124.47	0.349218	HUGO_SymbolWT	-2.11165	1.03509	-2.04006	8.26187	1.08644	62.8275	1.08644353367342-62.8275017572337	0.473939	0.0987305
European	COAD	MSH6	2	0.0415707	age_at_initial_pathologic_diagnosis+gender+PC1+PC2	5.19696	1.06497	25.3608	1.06496698271817-25.3608117572486	0.152553	0.0987305	inCancer	Binary	HUGO_Symbol	1	3.18931	7928	2659.13	0.0741214	HUGO_SymbolWT	-1.64807	0.808755	-2.03779	5.19696	1.06497	25.3608	1.06496698271817-25.3608117572487	0.152553	0.0987305
European	OV	RAD51C	2	0.0472682	age_at_initial_pathologic_diagnosis+gender+PC1+PC2	5.60569	1.02101	30.7773	1.02100621322559-30.7772635068892	0.152553	0.109971	inCancer	Binary	HUGO_Symbol	1	3.26007	7928	2828.38	0.0709861	HUGO_SymbolWT	-1.72378	0.86889	-1.98389	5.60569	1.02101	30.7773	1.02100621322559-30.7772635068892	0.152553	0.109971
European	BRCA	BRCA1	17	0.048944	age_at_initial_pathologic_diagnosis+gender+PC1+PC2	1.79314	1.00271	3.20668	1.0027070182251-3.20667817051835	0.00684287	0.110904	inCancer	Binary	HUGO_Symbol	1	10.9795	7928	5197.37	0.000921251	HUGO_SymbolWT	-0.583969	0.29657	-1.96908	1.79314	1.00271	3.20668	1.0027070182251-3.20667817051835	0.00684287	0.110904
European	STAD	ATM	6	0.049615	age_at_initial_pathologic_diagnosis+gender+PC1+PC2	2.94039	1.00182	8.6302	1.00181682492962-8.63019864027319	0.155373	0.110904	inCancer	Binary	HUGO_Symbol	1	3.11265	7928	2366.15	0.0776863	HUGO_SymbolWT	-1.07854	0.54936	-1.96327	2.94039	1.00182	8.6302	1.00181682492962-8.63019864027319	0.155373	0.110904
European	SKCM	CHEK2	3	0.0526333	age_at_initial_pathologic_diagnosis+gender+PC1+PC2	3.4426	0.986034	12.0194	0.986034446680537-12.0193529616748	0.306675	0.115242	inCancer	Binary	HUGO_Symbol	1	1.6691	7928	3398.09	0.196379	HUGO_SymbolWT	-1.23623	0.637915	-1.93792	3.4426	0.986034	12.0194	0.986034446680536-12.0193529616748	0.306675	0.115242
European	BRCA	PTPN11	2	0.0535774	age_at_initial_pathologic_diagnosis+gender+PC1+PC2	60.2346	0.938836	3864.58	0.938836265965987-3864.5846414705	0.0679906	0.115242	inCancer	Binary	HUGO_Symbol	1	5.54924	7928	5202.8	0.0184887	HUGO_SymbolWT	-4.09825	2.12318	-1.93024	60.2346	0.938836	3864.58	0.938836265965993-3864.5846414705	0.0679906	0.115242
European	OV	RECQL	2	0.0615622	age_at_initial_pathologic_diagnosis+gender+PC1+PC2	5.08088	0.924304	27.9295	0.924303851131866-27.9294510839117	0.230182	0.129965	inCancer	Binary	HUGO_Symbol	1	2.37062	7928	2829.27	0.123638	HUGO_SymbolWT	-1.62548	0.869505	-1.86944	5.08088	0.924304	27.9295	0.924303851131868-27.9294510839118	0.230182	0.129965
European	UCEC	RECQL4	2	0.0657033	age_at_initial_pathologic_diagnosis+gender+PC1+PC2	5.1624	0.898889	29.6481	0.898889272356649-29.6481421906383	0.0989032	0.136185	inCancer	Binary	HUGO_Symbol	1	4.41758	7928	2955.83	0.0355704	HUGO_SymbolWT	-1.6414	0.891852	-1.84044	5.1624	0.898889	29.6481	0.898889272356647-29.6481421906383	0.0989032	0.136185
European	SARC	BRIP1	2	0.0713861	age_at_initial_pathologic_diagnosis+gender+PC1+PC2	3.85675	0.88914	16.7291	0.889139548681392-16.729088686286	0.235537	0.145322	inCancer	Binary	HUGO_Symbol	1	2.29053	7928	1966	0.130165	HUGO_SymbolWT	-1.34982	0.748649	-1.80301	3.85675	0.88914	16.7291	0.889139548681392-16.729088686286	0.235537	0.145322
European	COAD	BLM	2	0.0737626	age_at_initial_pathologic_diagnosis+gender+PC1+PC2	3.96789	0.875917	17.9744	0.875916987612689-17.9744332406663	0.243873	0.147525	inCancer	Binary	HUGO_Symbol	1	2.16495	7928	2660.16	0.14119	HUGO_SymbolWT	-1.37823	0.770788	-1.78808	3.96789	0.875917	17.9744	0.875916987612692-17.9744332406664	0.243873	0.147525
European	LAML	RECQL	2	0.0851119	age_at_initial_pathologic_diagnosis+gender+PC1+PC2	6.15079	0.777777	48.6415	0.777777028814715-48.6415086123832	0.230182	0.167289	inCancer	Binary	HUGO_Symbol	1	2.3512	7928	910.555	0.125187	HUGO_SymbolWT	-1.81658	1.05507	-1.72177	6.15079	0.777777	48.6415	0.777777028814715-48.6415086123828	0.230182	0.167289
European	BRCA	FANCM	3	0.0886991	age_at_initial_pathologic_diagnosis+gender+PC1+PC2	4.00513	0.810563	19.79	0.810562800845894-19.790034385849	0.139298	0.171385	inCancer	Binary	HUGO_Symbol	1	3.55869	7928	5204.79	0.0592344	HUGO_SymbolWT	-1.38758	0.815118	-1.7023	4.00513	0.810563	19.79	0.810562800845894-19.790034385849	0.139298	0.171385
European	ESCA	ATM	2	0.102948	age_at_initial_pathologic_diagnosis+gender+PC1+PC2	3.37187	0.782392	14.5317	0.782392272124377-14.5316963005368	0.296331	0.195602	inCancer	Binary	HUGO_Symbol	1	1.73986	7928	1283.8	0.187157	HUGO_SymbolWT	-1.21547	0.745353	-1.63073	3.37187	0.782392	14.5317	0.782392272124379-14.5316963005369	0.296331	0.195602
European	LGG	BRIP1	3	0.110111	age_at_initial_pathologic_diagnosis+gender+PC1+PC2	2.94038	0.783053	11.0412	0.783052757161086-11.041216395998	0.247456	0.205782	inCancer	Binary	HUGO_Symbol	1	2.08388	7928	3465.36	0.148861	HUGO_SymbolWT	-1.07854	0.675061	-1.59769	2.94038	0.783053	11.0412	0.783052757161087-11.041216395998	0.247456	0.205782
European	LUAD	CHEK2	3	0.154109	age_at_initial_pathologic_diagnosis+gender+PC1+PC2	2.44706	0.714761	8.37776	0.714761008588729-8.37776495187551	0.247456	0.283361	inCancer	Binary	HUGO_Symbol	1	2.09602	7928	3119.8	0.147684	HUGO_SymbolWT	-0.894887	0.627917	-1.42517	2.44706	0.714761	8.37776	0.714761008588729-8.37776495187551	0.247456	0.283361
European	BRCA	PALB2	3	0.159102	age_at_initial_pathologic_diagnosis+gender+PC1+PC2	2.88022	0.660605	12.5577	0.660604528455052-12.5576634532312	0.473939	0.287898	inCancer	Binary	HUGO_Symbol	1	0.880885	7928	5207.47	0.347959	HUGO_SymbolWT	-1.05787	0.751272	-1.4081	2.88022	0.660605	12.5577	0.660604528455048-12.5576634532312	0.473939	0.287898
European	BRCA	PRDM9	2	0.184502	age_at_initial_pathologic_diagnosis+gender+PC1+PC2	3.35999	0.560989	20.1243	0.560988823490334-20.124331194347	0.340875	0.323934	inCancer	Binary	HUGO_Symbol	1	1.43938	7928	5206.91	0.23024	HUGO_SymbolWT	-1.21194	0.913278	-1.32702	3.35999	0.560989	20.1243	0.560988823490333-20.124331194347	0.340875	0.323934
European	ESCA	BRCA2	2	0.184699	age_at_initial_pathologic_diagnosis+gender+PC1+PC2	2.65359	0.627428	11.2229	0.627428493885224-11.222860249286	0.508738	0.323934	inCancer	Binary	HUGO_Symbol	1	0.716869	7928	1284.83	0.397173	HUGO_SymbolWT	-0.975914	0.735748	-1.32642	2.65359	0.627428	11.2229	0.627428493885224-11.2228602492859	0.508738	0.323934
European	BRCA	ATR	3	0.193942	age_at_initial_pathologic_diagnosis+gender+PC1+PC2	2.69621	0.603705	12.0416	0.603705287657679-12.0415581734368	0.162433	0.33499	inCancer	Binary	HUGO_Symbol	1	3.01217	7928	5205.34	0.0826414	HUGO_SymbolWT	-0.991847	0.763543	-1.29901	2.69621	0.603705	12.0416	0.603705287657679-12.0415581734368	0.162433	0.33499
East Asian	STAD	RECQL	2	0.196943	age_at_initial_pathologic_diagnosis+gender+PC1+PC2	4.9447	0.436266	56.044	0.436265715267325-56.044022119304	0.48747	0.335097	inCancer	Binary	HUGO_Symbol	1	0.796918	632	495.114	0.372016	HUGO_SymbolWT	-1.59832	1.23871	-1.29031	4.9447	0.436266	56.044	0.436265715267328-56.0440221193036	0.48747	0.335097
European	PRAD	ATM	4	0.204735	age_at_initial_pathologic_diagnosis+gender+PC1+PC2	2.03381	0.678918	6.09262	0.678917699992595-6.09262160123463	0.380197	0.343232	inCancer	Binary	HUGO_Symbol	1	1.25043	7928	3214.58	0.26347	HUGO_SymbolWT	-0.709912	0.559789	-1.26818	2.03381	0.678918	6.09262	0.678917699992596-6.09262160123463	0.380197	0.343232
European	BLCA	ATM	3	0.210678	age_at_initial_pathologic_diagnosis+gender+PC1+PC2	2.172	0.644751	7.31691	0.64475072208206-7.31690597094597	0.503482	0.348077	inCancer	Binary	HUGO_Symbol	1	0.743152	7928	2724.83	0.388653	HUGO_SymbolWT	-0.775648	0.619674	-1.2517	2.172	0.644751	7.31691	0.64475072208206-7.31690597094596	0.503482	0.348077
European	PRAD	PMS2	2	0.217641	age_at_initial_pathologic_diagnosis+gender+PC1+PC2	2.74715	0.550986	13.697	0.550986373506342-13.696955588006	0.278734	0.352508	inCancer	Binary	HUGO_Symbol	1	1.87282	7928	3213.95	0.171153	HUGO_SymbolWT	-1.01056	0.819714	-1.23283	2.74715	0.550986	13.697	0.55098637350634-13.696955588006	0.278734	0.352508
European	PRAD	BRCA1	3	0.222512	age_at_initial_pathologic_diagnosis+gender+PC1+PC2	2.20211	0.619445	7.82844	0.619444665152927-7.82844477351584	0.794284	0.352508	inCancer	Binary	HUGO_Symbol	1	0.151885	7928	3215.67	0.696741	HUGO_SymbolWT	-0.789416	0.647128	-1.21988	2.20211	0.619445	7.82844	0.619444665152927-7.82844477351584	0.794284	0.352508
African American	BRCA	BRCA1	2	0.222637	age_at_initial_pathologic_diagnosis+gender+PC1+PC2	4.05892	0.427188	38.5659	0.427187651211629-38.5658626149891	0.386577	0.352508	inCancer	Binary	HUGO_Symbol	1	1.21025	944	913.657	0.271282	HUGO_SymbolWT	-1.40092	1.14872	-1.21955	4.05892	0.427188	38.5659	0.427187651211623-38.5658626149893	0.386577	0.352508
European	LGG	PALB2	2	0.227497	age_at_initial_pathologic_diagnosis+gender+PC1+PC2	2.65565	0.543616	12.9733	0.54361575985816-12.9733009276172	0.473939	0.35527	inCancer	Binary	HUGO_Symbol	1	0.906876	7928	3466.54	0.340945	HUGO_SymbolWT	-0.97669	0.809302	-1.20683	2.65565	0.543616	12.9733	0.54361575985816-12.9733009276172	0.473939	0.35527
European	THCA	COL7A1	2	0.253102	age_at_initial_pathologic_diagnosis+gender+PC1+PC2	2.44207	0.528153	11.2916	0.528153125661556-11.2916236916133	0.422207	0.389913	inCancer	Binary	HUGO_Symbol	1	1.07424	7928	2898.26	0.299989	HUGO_SymbolWT	-0.892846	0.781247	-1.14285	2.44207	0.528153	11.2916	0.528153125661557-11.2916236916133	0.422207	0.389913
European	LUSC	PMS2	2	0.263825	age_at_initial_pathologic_diagnosis+gender+PC1+PC2	2.44613	0.509411	11.746	0.509411444683388-11.7460227145662	0.308734	0.400132	inCancer	Binary	HUGO_Symbol	1	1.63941	7928	3420.76	0.200406	HUGO_SymbolWT	-0.894508	0.800528	-1.1174	2.44613	0.509411	11.746	0.509411444683388-11.7460227145662	0.308734	0.400132
East Asian	LIHC	POLE	2	0.272435	age_at_initial_pathologic_diagnosis+gender+PC1+PC2	4.58044	0.302413	69.3767	0.302412888304589-69.3766734440318	0.236125	0.400132	inCancer	Binary	HUGO_Symbol	1	2.26225	632	716.219	0.132562	HUGO_SymbolWT	-1.52179	1.38664	-1.09747	4.58044	0.302413	69.3767	0.302412888304588-69.3766734440317	0.236125	0.400132
European	BRCA	BUB1B	2	0.274589	age_at_initial_pathologic_diagnosis+gender+PC1+PC2	2.70786	0.453448	16.1706	0.453447845210026-16.1705540636937	0.279551	0.400132	inCancer	Binary	HUGO_Symbol	1	1.84722	7928	5206.5	0.174107	HUGO_SymbolWT	-0.996158	0.911769	-1.09256	2.70786	0.453448	16.1706	0.453447845210027-16.1705540636937	0.279551	0.400132
European	BRCA	CDKN2A	2	0.274811	age_at_initial_pathologic_diagnosis+gender+PC1+PC2	2.72964	0.450197	16.5503	0.450197343851722-16.5503168612207	0.340875	0.400132	inCancer	Binary	HUGO_Symbol	1	1.43938	7928	5206.91	0.23024	HUGO_SymbolWT	-1.00417	0.919526	-1.09205	2.72964	0.450197	16.5503	0.450197343851724-16.5503168612208	0.340875	0.400132
European	LGG	TP53	2	0.277284	age_at_initial_pathologic_diagnosis+gender+PC1+PC2	3.13908	0.39862	24.7198	0.398620313153385-24.719781034549	0.152553	0.400132	inCancer	Binary	HUGO_Symbol	1	3.1714	7928	3464.27	0.0749382	HUGO_SymbolWT	-1.14393	1.05291	-1.08644	3.13908	0.39862	24.7198	0.398620313153386-24.7197810345489	0.152553	0.400132
European	BRCA	PMS2	2	0.327899	age_at_initial_pathologic_diagnosis+gender+PC1+PC2	2.41916	0.412153	14.1995	0.412152565483864-14.1994614163274	0.662434	0.462053	inCancer	Binary	HUGO_Symbol	1	0.34346	7928	5208.01	0.557839	HUGO_SymbolWT	-0.883421	0.902967	-0.978354	2.41916	0.412153	14.1995	0.412152565483863-14.1994614163273	0.662434	0.462053
European	LGG	COL7A1	2	0.328301	age_at_initial_pathologic_diagnosis+gender+PC1+PC2	2.18261	0.456387	10.438	0.456386540427842-10.4380216055411	0.56402	0.462053	inCancer	Binary	HUGO_Symbol	1	0.570082	7928	3466.87	0.450226	HUGO_SymbolWT	-0.78052	0.798451	-0.977543	2.18261	0.456387	10.438	0.456386540427842-10.4380216055411	0.56402	0.462053
European	BRCA	ATM	7	0.341163	age_at_initial_pathologic_diagnosis+gender+PC1+PC2	1.55778	0.625351	3.8805	0.625350563155289-3.8804952075663	0.327217	0.4743	inCancer	Binary	HUGO_Symbol	1	1.5356	7928	5206.81	0.215274	HUGO_SymbolWT	-0.44326	0.465673	-0.951869	1.55778	0.625351	3.8805	0.625350563155289-3.8804952075663	0.327217	0.4743
European	CESC	BRCA1	2	0.445719	age_at_initial_pathologic_diagnosis+gender+PC1+PC2	0.573968	0.137778	2.39109	0.137777913475229-2.39108653734505	0.90958	0.612192	inCancer	Binary	HUGO_Symbol	1	0.0206838	7928	1859.61	0.885644	HUGO_SymbolWT	0.555182	0.728039	0.762572	0.573968	0.137778	2.39109	0.137777913475229-2.39108653734504	0.90958	0.612192
European	BRCA	GJB2	2	0.462981	age_at_initial_pathologic_diagnosis+gender+PC1+PC2	1.88738	0.346093	10.2926	0.34609299833092-10.2926123828986	0.533477	0.628232	inCancer	Binary	HUGO_Symbol	1	0.64706	7928	5207.7	0.421166	HUGO_SymbolWT	-0.635189	0.865443	-0.733947	1.88738	0.346093	10.2926	0.346092998330919-10.2926123828986	0.533477	0.628232
European	LUSC	BRIP1	2	0.468419	age_at_initial_pathologic_diagnosis+gender+PC1+PC2	1.74676	0.386748	7.88931	0.386748383724511-7.88931060802032	0.587266	0.628232	inCancer	Binary	HUGO_Symbol	1	0.512789	7928	3421.88	0.473934	HUGO_SymbolWT	-0.557764	0.769272	-0.725054	1.74676	0.386748	7.88931	0.38674838372451-7.88931060802032	0.587266	0.628232
East Asian	LIHC	BRCA2	2	0.487612	age_at_initial_pathologic_diagnosis+gender+PC1+PC2	1.87185	0.318755	10.9922	0.318755184489237-10.9922439926037	0.779151	0.64637	inCancer	Binary	HUGO_Symbol	1	0.189945	632	718.292	0.662962	HUGO_SymbolWT	-0.626929	0.903211	-0.694111	1.87185	0.318755	10.9922	0.318755184489237-10.9922439926038	0.779151	0.64637
European	LIHC	BRCA1	2	0.506761	age_at_initial_pathologic_diagnosis+gender+PC1+PC2	1.6183	0.390718	6.70281	0.390718313858357-6.70280997036331	0.832934	0.664031	inCancer	Binary	HUGO_Symbol	1	0.0876582	7928	1703.49	0.767176	HUGO_SymbolWT	-0.481379	0.725089	-0.66389	1.6183	0.390718	6.70281	0.390718313858357-6.70280997036331	0.832934	0.664031
European	HNSC	BRCA2	2	0.600102	age_at_initial_pathologic_diagnosis+gender+PC1+PC2	0.684225	0.165607	2.82696	0.165606799050784-2.82696157902493	0.486364	0.777405	inCancer	Binary	HUGO_Symbol	1	0.814116	7928	3296.11	0.366906	HUGO_SymbolWT	0.379468	0.723825	0.524254	0.684225	0.165607	2.82696	0.165606799050785-2.82696157902492	0.486364	0.777405
European	LUAD	BRCA1	2	0.628252	age_at_initial_pathologic_diagnosis+gender+PC1+PC2	0.705026	0.171296	2.90177	0.171296072064929-2.90176536420257	0.47645	0.804728	inCancer	Binary	HUGO_Symbol	1	0.854622	7928	3121.04	0.355248	HUGO_SymbolWT	0.349521	0.721871	0.484188	0.705026	0.171296	2.90177	0.171296072064929-2.90176536420257	0.47645	0.804728
European	PCPG	BRCA2	2	0.63629	age_at_initial_pathologic_diagnosis+gender+PC1+PC2	1.41513	0.335582	5.96754	0.335582245499796-5.96753623332151	0.616638	0.805967	inCancer	Binary	HUGO_Symbol	1	0.448502	7928	1447.37	0.503047	HUGO_SymbolWT	-0.347223	0.734254	-0.472892	1.41513	0.335582	5.96754	0.335582245499796-5.96753623332151	0.616638	0.805967
European	COAD	ATM	2	0.678529	age_at_initial_pathologic_diagnosis+gender+PC1+PC2	1.35409	0.322931	5.67787	0.322930535920252-5.67787173221439	0.884826	0.848304	inCancer	Binary	HUGO_Symbol	1	0.0458248	7928	2662.28	0.830495	HUGO_SymbolWT	-0.303129	0.731364	-0.414471	1.35409	0.322931	5.67787	0.322930535920252-5.67787173221439	0.884826	0.848304
European	STAD	BRCA1	2	0.684596	age_at_initial_pathologic_diagnosis+gender+PC1+PC2	1.34453	0.322253	5.60979	0.322252865115863-5.60978974006655	0.832066	0.848304	inCancer	Binary	HUGO_Symbol	1	0.0995788	7928	2369.16	0.752336	HUGO_SymbolWT	-0.296047	0.728823	-0.406199	1.34453	0.322253	5.60979	0.322252865115863-5.60978974006655	0.832066	0.848304
European	SKCM	BRCA2	4	0.717343	age_at_initial_pathologic_diagnosis+gender+PC1+PC2	1.20826	0.433842	3.36505	0.433842000045062-3.36505333973496	0.896508	0.874258	inCancer	Binary	HUGO_Symbol	1	0.0323841	7928	3399.73	0.857187	HUGO_SymbolWT	-0.189184	0.522591	-0.362013	1.20826	0.433842	3.36505	0.433842000045062-3.36505333973496	0.896508	0.874258
European	SKCM	ATM	3	0.722274	age_at_initial_pathologic_diagnosis+gender+PC1+PC2	1.2395	0.379344	4.05007	0.379344478841326-4.05006552924297	0.794284	0.874258	inCancer	Binary	HUGO_Symbol	1	0.156274	7928	3399.6	0.692611	HUGO_SymbolWT	-0.214711	0.604104	-0.355421	1.2395	0.379344	4.05007	0.379344478841326-4.05006552924297	0.794284	0.874258
European	BRCA	BRIP1	2	0.728549	age_at_initial_pathologic_diagnosis+gender+PC1+PC2	1.32655	0.268944	6.54309	0.268944027017275-6.54308895905212	0.931504	0.874258	inCancer	Binary	HUGO_Symbol	1	0.00926153	7928	5208.34	0.923332	HUGO_SymbolWT	-0.282579	0.814214	-0.347057	1.32655	0.268944	6.54309	0.268944027017275-6.54308895905213	0.931504	0.874258
European	BRCA	CHEK2	3	0.746603	age_at_initial_pathologic_diagnosis+gender+PC1+PC2	1.23518	0.343024	4.44769	0.343024206084883-4.44768770321971	0.795313	0.886591	inCancer	Binary	HUGO_Symbol	1	0.136688	7928	5208.21	0.711596	HUGO_SymbolWT	-0.211215	0.65367	-0.323122	1.23518	0.343024	4.44769	0.343024206084883-4.44768770321971	0.795313	0.886591
European	BRCA	BLM	2	0.791921	age_at_initial_pathologic_diagnosis+gender+PC1+PC2	1.23676	0.255081	5.99639	0.255081425573366-5.99639322651666	0.794284	0.925691	inCancer	Binary	HUGO_Symbol	1	0.153472	7928	5208.2	0.695239	HUGO_SymbolWT	-0.212493	0.805456	-0.263817	1.23676	0.255081	5.99639	0.255081425573366-5.99639322651667	0.794284	0.925691
European	BRCA	RET	2	0.79577	age_at_initial_pathologic_diagnosis+gender+PC1+PC2	1.23528	0.249385	6.1187	0.249385491501062-6.11869810382971	0.884826	0.925691	inCancer	Binary	HUGO_Symbol	1	0.0465087	7928	5208.3	0.829254	HUGO_SymbolWT	-0.211297	0.816368	-0.258826	1.23528	0.249385	6.1187	0.249385491501062-6.11869810382971	0.884826	0.925691
European	SARC	BRCA2	2	0.806446	age_at_initial_pathologic_diagnosis+gender+PC1+PC2	1.19374	0.289514	4.92211	0.289514370153327-4.92211479985225	0.901479	0.928634	inCancer	Binary	HUGO_Symbol	1	0.0268472	7928	1968.27	0.869848	HUGO_SymbolWT	-0.177094	0.722791	-0.245014	1.19374	0.289514	4.92211	0.289514370153327-4.92211479985226	0.901479	0.928634
European	LUSC	BRCA1	2	0.903617	age_at_initial_pathologic_diagnosis+gender+PC1+PC2	0.915324	0.218594	3.83275	0.218594283382122-3.83275159148528	0.363941	0.998551	inCancer	Binary	HUGO_Symbol	1	1.32884	7928	3421.07	0.249012	HUGO_SymbolWT	0.0884774	0.730656	0.121093	0.915324	0.218594	3.83275	0.218594283382122-3.83275159148528	0.363941	0.998551
African American	BRCA	BRCA2	2	0.916897	age_at_initial_pathologic_diagnosis+gender+PC1+PC2	0.91538	0.173913	4.81805	0.173912856309084-4.81805007396946	0.643112	0.998551	inCancer	Binary	HUGO_Symbol	1	0.393844	944	914.473	0.530285	HUGO_SymbolWT	0.0884158	0.847355	0.104343	0.91538	0.173913	4.81805	0.173912856309084-4.81805007396946	0.643112	0.998551
European	STAD	BRCA2	2	0.917624	age_at_initial_pathologic_diagnosis+gender+PC1+PC2	1.07865	0.256925	4.52848	0.256925436454785-4.52847656467862	0.896508	0.998551	inCancer	Binary	HUGO_Symbol	1	0.0333689	7928	2369.23	0.855056	HUGO_SymbolWT	-0.0757081	0.731992	-0.103428	1.07865	0.256925	4.52848	0.256925436454785-4.52847656467862	0.896508	0.998551
European	LGG	ATM	2	0.934	age_at_initial_pathologic_diagnosis+gender+PC1+PC2	0.940305	0.219084	4.03577	0.219084038891004-4.03577430527058	0.832066	0.998551	inCancer	Binary	HUGO_Symbol	1	0.0940604	7928	3467.35	0.759077	HUGO_SymbolWT	0.0615509	0.743253	0.0828128	0.940305	0.219084	4.03577	0.219084038891004-4.03577430527058	0.832066	0.998551
European	KIRP	MET	3	0.954379	age_at_initial_pathologic_diagnosis+gender+PC1+PC2	3.53618e+07	8.59262e-252	1.45527e+266	8.59262451222319e-252-1.45527130383274e+266	4.29363e-05	0.998551	inCancer	Binary	HUGO_Symbol	1	22.0645	7928	1859.48	2.63644e-06	HUGO_SymbolWT	-17.3811	303.823	-0.0572082	3.53618e+07	8.59262e-252	1.45527e+266	8.59262451222319e-252-1.45527130383274e+266	4.29363e-05	0.998551
European	UCEC	BRCA1	4	0.965556	age_at_initial_pathologic_diagnosis+gender+PC1+PC2	1.02298	0.364827	2.86843	0.364826701423841-2.86843211835596	0.795313	0.998551	inCancer	Binary	HUGO_Symbol	1	0.141348	7928	2960.11	0.706945	HUGO_SymbolWT	-0.0227164	0.526055	-0.0431825	1.02298	0.364827	2.86843	0.364826701423841-2.86843211835597	0.795313	0.998551
African American	KIRP	FH	2	0.976753	age_at_initial_pathologic_diagnosis+gender+PC1+PC2	7.71665e+07	0	Inf	0-Inf	0.00684287	0.998551	inCancer	Binary	HUGO_Symbol	1	10.9614	944	446.797	0.000930285	HUGO_SymbolWT	-18.1615	623.26	-0.0291395	7.71665e+07	0	Inf	0-Inf	0.00684287	0.998551
European	BRCA	COL7A1	2	0.977597	age_at_initial_pathologic_diagnosis+gender+PC1+PC2	1.0225	0.216404	4.83125	0.216404483304617-4.83124576249856	0.98206	0.998551	inCancer	Binary	HUGO_Symbol	1	0.000505624	7928	5208.35	0.98206	HUGO_SymbolWT	-0.0222492	0.792288	-0.0280822	1.0225	0.216404	4.83125	0.216404483304617-4.83124576249855	0.98206	0.998551
European	THCA	BRCA2	4	0.979243	age_at_initial_pathologic_diagnosis+gender+PC1+PC2	0.986243	0.347356	2.80023	0.347355695831032-2.8002271106503	0.662434	0.998551	inCancer	Binary	HUGO_Symbol	1	0.353331	7928	2898.98	0.552234	HUGO_SymbolWT	0.0138527	0.532435	0.0260177	0.986243	0.347356	2.80023	0.347355695831032-2.8002271106503	0.662434	0.998551
African American	BRCA	ATR	2	0.980409	age_at_initial_pathologic_diagnosis+gender+PC1+PC2	4.11354e+06	0	Inf	0-Inf	0.049955	0.998551	inCancer	Binary	HUGO_Symbol	1	6.70016	944	908.167	0.00964045	HUGO_SymbolWT	-15.2298	620.216	-0.0245556	4.11354e+06	0	Inf	0-Inf	0.049955	0.998551
African American	KIRC	VHL	2	0.984159	age_at_initial_pathologic_diagnosis+gender+PC1+PC2	4.0899e+07	0	Inf	0-Inf	0.0641763	0.998551	inCancer	Binary	HUGO_Symbol	1	5.78183	944	402.679	0.0161927	HUGO_SymbolWT	-17.5266	882.743	-0.0198547	4.0899e+07	0	Inf	0-Inf	0.0641763	0.998551
African American	PCPG	SDHB	2	0.985362	age_at_initial_pathologic_diagnosis+gender+PC1+PC2	9.64204e+07	0	Inf	0-Inf	0.000878604	0.998551	inCancer	Binary	HUGO_Symbol	1	15.6288	944	178.206	7.70705e-05	HUGO_SymbolWT	-18.3842	1002.03	-0.0183469	9.64204e+07	0	Inf	0-Inf	0.000878604	0.998551
African American	PRAD	ATM	3	0.986125	age_at_initial_pathologic_diagnosis+gender+PC1+PC2	3.13325e+07	0	Inf	0-Inf	0.00417088	0.998551	inCancer	Binary	HUGO_Symbol	1	12.5208	944	423.697	0.000402454	HUGO_SymbolWT	-17.2602	992.49	-0.0173908	3.13325e+07	0	Inf	0-Inf	0.00417088	0.998551
European	HNSC	PALB2	2	0.997052	age_at_initial_pathologic_diagnosis+gender+PC1+PC2	0.99617	0.130075	7.62908	0.130075280118432-7.62908121778501	0.931504	0.998551	inCancer	Binary	HUGO_Symbol	1	0.0102996	7928	3296.92	0.919164	HUGO_SymbolWT	0.00383725	1.03869	0.0036943	0.99617	0.130075	7.62908	0.130075280118433-7.62908121778494	0.931504	0.998551
European	UCEC	HFE	2	0.998551	age_at_initial_pathologic_diagnosis+gender+PC1+PC2	7.72057e+09	0	Inf	0-Inf	0.00424698	0.998551	inCancer	Binary	HUGO_Symbol	1	12.3245	7928	2947.92	0.000447051	HUGO_SymbolWT	-22.7672	12536.1	-0.00181612	7.72057e+09	0	Inf	0-Inf	0.00424698	0.998551

## Sheet: S2b.Association (TFT)
Gene	Cancer	Other Cancers Sample Count	Other Cancers Allele Count	Cohort Sample Count	Cohort Allele Count	P	OR	FDR	Ancestry
SDHB	PCPG	777	0	20	2	0.00072459	Inf	0.00797049	African American
ATM	PRAD	738	1	59	3	0.00167451	37.0637	0.00920981	African American
VHL	KIRC	743	0	54	2	0.0048306	Inf	0.0177122	African American
FH	KIRP	734	0	63	2	0.00652445	Inf	0.0179422	African American
PTEN	UCEC	685	0	112	2	0.0202038	Inf	0.0444484	African American
BRCA2	LUSC	768	5	29	2	0.0267903	10.5005	0.0447169	African American
BRCA2	OV	767	5	30	2	0.0284562	10.1432	0.0447169	African American
ATR	BRCA	617	0	180	2	0.0516655	Inf	0.07104	African American
PMS2	UCEC	685	2	112	2	0.0992504	6.09353	0.121306	African American
BRCA1	BRCA	617	3	180	2	0.318503	2.28237	0.350353	African American
BRCA2	BRCA	617	5	180	2	0.495011	1.37053	0.495011	African American
RECQL	STAD	492	2	90	2	0.118145	5.44232	0.318756	East Asian
BRIP1	STAD	492	3	90	2	0.176712	3.63291	0.318756	East Asian
POLE	LIHC	420	1	162	2	0.191253	5.16812	0.318756	East Asian
GJB2	STAD	492	7	90	2	0.420769	1.56054	0.525961	East Asian
BRCA2	LIHC	420	4	162	2	0.533923	1.29571	0.533923	East Asian
BRCA1	OV	7836	43	348	31	1.07697e-22	16.2164	1.12005e-20	European
BRCA2	OV	7836	45	348	22	4.9972e-14	11.0019	2.59855e-12	European
VHL	PCPG	8038	4	146	6	7.29406e-09	82.1921	2.52861e-07	European
RET	PCPG	8038	10	146	7	1.14049e-08	38.4386	2.96527e-07	European
SDHB	PCPG	8038	1	146	4	5.33309e-07	219.259	1.10928e-05	European
NF1	PCPG	8038	10	146	5	5.13148e-06	27.4497	8.89457e-05	European
MET	KIRP	7977	0	207	3	1.66423e-05	Inf	0.000247257	European
SDHD	PCPG	8038	1	146	3	2.33132e-05	163.769	0.000303071	European
NF1	SARC	7967	10	217	5	3.34714e-05	18.3325	0.00038678	European
MSH6	UCEC	7802	7	382	5	0.000137538	14.5726	0.0014304	European
BRCA2	BRCA	7373	51	811	16	0.000746254	2.85159	0.00705549	European
BRCA1	BRCA	7373	57	811	17	0.000832508	2.71095	0.00721507	European
ATM	STAD	7890	41	294	7	0.0016535	4.58077	0.013228	European
TP53	SARC	7967	7	217	3	0.0019925	15.71	0.0148014	European
HFE	UCEC	7802	0	382	2	0.00219503	Inf	0.0152188	European
MAX	PCPG	8038	3	146	2	0.00313047	36.6082	0.0203481	European
APC	SARC	7967	2	217	2	0.00412362	36.6268	0.0252269	European
SDHA	SKCM	7736	4	448	3	0.00491327	12.9376	0.0283878	European
PALB2	STAD	7890	16	294	4	0.00521399	6.70532	0.0285397	European
BAP1	LIHC	8005	4	179	2	0.00687213	22.33	0.0357351	European
BUB1B	LUSC	7729	5	455	3	0.007871	10.1848	0.0389802	European
MLH1	COAD	7841	2	343	2	0.0100383	22.8289	0.0474539	European
ATM	PAAD	8026	44	158	4	0.0143604	4.61621	0.0649339	European
RECQL4	SARC	7967	6	217	2	0.0179121	12.2253	0.0755432	European
BAP1	KIRC	7878	4	306	2	0.0191269	12.8572	0.0755432	European
RECQL	LAML	8059	12	125	2	0.0191844	10.7322	0.0755432	European
CHEK2	BLCA	7855	22	329	4	0.0196122	4.33944	0.0755432	European
FAH	SARC	7967	7	217	2	0.0226232	10.4799	0.084029	European
COL7A1	HNSC	7745	17	439	4	0.0241298	4.14992	0.0865343	European
TMEM127	THCA	7825	4	359	2	0.025831	10.8892	0.0895475	European
MSH6	LIHC	8005	10	179	2	0.0276785	8.93682	0.0902878	European
MSH2	SARC	7967	8	217	2	0.0277809	9.17112	0.0902878	European
GJB2	KIRP	7977	9	207	2	0.0305974	8.55723	0.095277	European
BUB1B	GBM	7892	6	292	2	0.0311483	9.0026	0.095277	European
ATM	LUAD	7768	42	416	6	0.0347503	2.66727	0.103258	European
RECQL	HNSC	7745	11	439	3	0.0363351	4.8097	0.104968	European
BRCA2	PAAD	8026	63	158	4	0.042264	3.22438	0.118796	European
PMS2	PRAD	7773	13	411	3	0.0438307	4.3629	0.119958	European
RECQL4	UCEC	7802	6	382	2	0.0508716	6.80507	0.131695	European
PTPN11	BRCA	7373	2	811	2	0.0515719	9.08627	0.131695	European
VHL	KIRC	7878	8	306	2	0.0519184	6.43273	0.131695	European
BRIP1	ESCA	8058	22	126	2	0.0532675	5.81067	0.1319	European
FAH	THCA	7825	7	359	2	0.0567736	6.22391	0.137313	European
PMS2	KIRP	7977	14	207	2	0.0613768	5.50184	0.140755	European
GJB2	KIRC	7878	9	306	2	0.0619022	5.71817	0.140755	European
COL7A1	PAAD	8026	19	158	2	0.0623014	5.34369	0.140755	European
MSH2	COAD	7841	8	343	2	0.0636102	5.71221	0.140755	European
ATR	BRCA	7373	7	811	3	0.0689453	3.89485	0.146258	European
FANCM	BRCA	7373	7	811	3	0.0689453	3.89485	0.146258	European
RAD51C	BLCA	7855	9	329	2	0.0703161	5.30386	0.146258	European
RAD51C	OV	7836	9	348	2	0.0775487	5.00113	0.158138	European
BRIP1	OV	7836	21	348	3	0.0808389	3.21593	0.161678	European
MSH6	COAD	7841	10	343	2	0.0882763	4.57017	0.173221	European
CHEK2	PAAD	8026	24	158	2	0.0904871	4.23151	0.174271	European
ATM	BRCA	7373	40	811	8	0.0991806	1.81808	0.187541	European
TP53	LGG	7729	8	455	2	0.103825	4.24537	0.189435	European
ATR	LUSC	7729	8	455	2	0.103825	4.24537	0.189435	European
RECQL	OV	7836	12	348	2	0.118018	3.75141	0.211618	European
BLM	BLCA	7855	13	329	2	0.120814	3.67188	0.21296	European
BLM	COAD	7841	13	343	2	0.12937	3.51594	0.224241	European
BRIP1	SARC	7967	22	217	2	0.133482	3.33674	0.227576	European
CHEK2	LUAD	7768	23	416	3	0.144618	2.43522	0.242585	European
BRIP1	LGG	7729	21	455	3	0.147147	2.42628	0.242909	European
CHEK2	SKCM	7736	23	448	3	0.169034	2.25211	0.273714	European
ATM	ESCA	8058	46	126	2	0.171071	2.77993	0.273714	European
BUB1B	BRCA	7373	6	811	2	0.18459	3.02965	0.286528	European
CDKN2A	BRCA	7373	6	811	2	0.18459	3.02965	0.286528	European
PMS2	HNSC	7745	14	439	2	0.211494	2.51988	0.323461	European
ATM	PRAD	7773	44	411	4	0.221788	1.71916	0.326882	European
PMS2	LGG	7729	14	455	2	0.22316	2.42628	0.326882	European
PMS2	LUSC	7729	14	455	2	0.22316	2.42628	0.326882	European
COL7A1	THCA	7825	19	359	2	0.235532	2.29413	0.340213	European
BRCA1	TGCT	8077	72	107	2	0.255563	2.09656	0.364089	European
PRDM9	BRCA	7373	8	811	2	0.260851	2.2724	0.366602	European
BRCA2	ESCA	8058	65	126	2	0.278869	1.96754	0.386698	European
PALB2	HNSC	7745	18	439	2	0.292533	1.96006	0.400308	European
GJB2	BRCA	7373	9	811	2	0.299261	2.02007	0.404197	European
ATM	BLCA	7855	45	329	3	0.305484	1.59156	0.404515	European
PALB2	LGG	7729	18	455	2	0.307276	1.8873	0.404515	European
PALB2	BRCA	7373	17	811	3	0.318586	1.60421	0.414161	European
COL7A1	LGG	7729	19	455	2	0.328137	1.78792	0.421311	European
BRCA2	PCPG	8038	65	146	2	0.338948	1.69385	0.42683	European
BRCA2	THCA	7825	63	359	4	0.340643	1.38384	0.42683	European
BRIP1	LUSC	7729	22	455	2	0.389468	1.54413	0.482199	European
BRIP1	BRCA	7373	21	811	3	0.430329	1.2987	0.52652	European
BLM	BRCA	7373	13	811	2	0.446583	1.39858	0.540054	European
BRCA1	UCEC	7802	70	382	4	0.45727	1.16707	0.546622	European
PMS2	BRCA	7373	14	811	2	0.480738	1.2987	0.560689	European
CHEK2	BRCA	7373	23	811	3	0.483789	1.18579	0.560689	European
BRCA1	LIHC	8005	72	179	2	0.485212	1.2422	0.560689	European
ATM	SKCM	7736	45	448	3	0.493863	1.15117	0.563983	European
BRCA2	SKCM	7736	63	448	4	0.504146	1.09634	0.563983	European
ATM	LGG	7729	45	455	3	0.504331	1.13244	0.563983	European
RET	BRCA	7373	15	811	2	0.513554	1.21213	0.568187	European
BRCA2	SARC	7967	65	217	2	0.534764	1.12965	0.585426	European
BRCA1	CESC	7976	72	208	2	0.565436	1.06513	0.612555	European
ATM	COAD	7841	46	343	2	0.603748	0.993916	0.647318	European
COL7A1	BRCA	7373	19	811	2	0.630401	0.956976	0.668997	European
BRCA2	STAD	7890	65	294	2	0.699127	0.825762	0.734436	European
BRCA1	PRAD	7773	71	411	3	0.724904	0.799131	0.7539	European
BRCA1	STAD	7890	72	294	2	0.749574	0.745485	0.771839	European
BRCA2	HNSC	7745	65	439	2	0.880406	0.542859	0.897669	European
BRCA1	LUAD	7768	72	416	2	0.895173	0.518715	0.903864	European
BRCA1	LUSC	7729	72	455	2	0.921933	0.471887	0.921933	European

## Sheet: S3.gnomAD_P-LP_genes
Gene	Cancer	AF_Cancer (TCGA)	AC_Cancer (TCGA)	AN_Cancer (TCGA)	Ancestry_associated	AF_African	AF_Ashkenazi.Jewish	AF_East.Asian	AF_South.Asian	AF_European.Finnish	AF_European.non.Finnish	AF_Latino	AF_Other	AC_African	AN_African	AC_Ashkenazi.Jewish	AN_Ashkenazi.Jewish	AC_East.Asian	AN_East.Asian	AC_South.Asian	AN_South.Asian	AC_European.Finnish	AN_European.Finnish	AC_European.non.Finnish	AN_European.non.Finnish	AC_Latino	AN_Latino	AC_Other	AN_Other
ATM	PRAD	0.0508475	6	118	AFR	0.000127011	0.000101399	0.000103885	3.2759e-05	0.000119484	0.000110035	5.69671e-05	0.000149076	3	23620	1	9862	2	19252	1	30526	3	25108	13	118144	2	35108	1	6708
SDHB	PCPG	0.1	4	40	AFR	0.00042337	0	0.000571369	0.00062242	0.000438107	0.000939372	0.00145266	0.000596481	10	23620	0	9862	11	19252	19	30526	11	25108	111	118164	51	35108	4	6706
VHL	KIRC	0.037037	4	108	AFR	0.000169377	0.000101399	0	0.000753456	0	0.000829201	5.69671e-05	0.000447227	4	23616	1	9862	0	19252	23	30526	0	25102	98	118186	2	35108	3	6708
FH	KIRP	0.031746	4	126	AFR	0.000169362	0.000101399	0.00140245	0.000524143	0.000159312	0.000304636	5.69671e-05	0.000298151	4	23618	1	9862	27	19252	16	30526	4	25108	36	118174	2	35108	2	6708
PTEN	UCEC	0.0178571	4	224	AFR	0.000211882	0.000101461	5.19427e-05	3.2759e-05	0	4.24268e-05	5.7019e-05	0	5	23598	1	9856	1	19252	1	30526	0	25038	5	117850	2	35076	0	6682
BRCA2	LUSC	0.0689655	4	58	AFR	0.000719729	0	0.000467484	0.00032759	0.00019914	0.000482429	0.000569671	0.000298151	17	23620	0	9862	9	19252	10	30526	5	25108	57	118152	20	35108	2	6708
BRCA2	OV	0.0645161	4	62	AFR	0.000719729	0	0.000467484	0.00032759	0.00019914	0.000482429	0.000569671	0.000298151	17	23620	0	9862	9	19252	10	30526	5	25108	57	118152	20	35108	2	6708
RECQL	STAD	0.0222222	4	180	EAS	0	0	0	0	0	0	0	0	0	23608	0	9860	0	19252	0	30522	0	25106	0	118030	0	35102	0	6698
POLE	LIHC	0.0122699	4	326	EAS	0	0	0	9.82769e-05	0	0	0	0	0	23620	0	9862	0	19252	3	30526	0	25108	0	118182	0	35108	0	6708
BRIP1	STAD	0.0222222	4	180	EAS	0.000338725	0	0.000675255	0.00032759	3.98279e-05	0.000990183	0.000313319	0.000447361	8	23618	0	9862	13	19252	10	30526	1	25108	117	118160	11	35108	3	6706
Columns O-AD contain total allele counts and maximum allele number of rare pathogenic and likely pathogenic variants in gnomAD non-cancer dataset

## Sheet: S4a.PredisposingVariants
HUGO_Symbol	cancer	Chromosome	Start	Stop	Reference	Alternate	Variant_Classification	transcript_name	HGVSg	HGVSc	HGVSp	Genotype	Allele_Frequency	VEP_Most_Severe_Consequence	Positive_Evidence	Negative_Evidence	Positive_CharGer_Score	Negative_CharGer_Score	CharGer_Score	ClinVar_Pathogenicity	ACMG_Classification	CharGer_Classification	PubMed_Link	ClinVar_Traits	CharGer_Summary	Allele	Consequence	IMPACT	SYMBOL	Gene	Feature_type	Feature	BIOTYPE	EXON	INTRON	HGVSc.1	HGVSp.1	cDNA_position	CDS_position	Protein_position	Amino_acids	Codons	Existing_variation	DISTANCE	STRAND	FLAGS	VARIANT_CLASS	CCDS	ENSP
BRCA2	LUSC	13	32954272	32954273	-	A	frameshift_variant	ENST00000544455	13:g.32954272_32954273insA	ENST00000544455:c.9473_9474insA	ENSP00000439902:p.-3082-3083X	0/1:27,12:39:99:248,0,737	0	frameshift_variant	PM2,PVS1	NA	10	0	10	NA	Uncertain Significance	Pathogenic	NA	NA	PVS1(frameshift_variant in susceptible gene BRCA2) -- PM2(Low/absent allele frequency None<=0.0005)	A	frameshift_variant	HIGH	BRCA2	ENSG00000139618	Transcript	ENST00000380152	protein_coding	24/27	NA	ENST00000380152.3:c.9246_9247insA	ENSP00000369497.3:p.Thr3085AsnfsTer26	9479-9480	9246-9247	3082-3083	-/X	-/A	NA	NA	1	NA	insertion	CCDS9344.1	ENSP00000369497
BRCA2	LUSC	13	32968951	32968951	C	T	stop_gained	ENST00000544455	13:g.32968951C>T	ENST00000544455:c.9609C>T	ENSP00000439902:p.R3128*	0/1:38,24:62:99:607,0,1180	0	stop_gained	PM2,PS1,PVS1	NA	17	0	17	Pathogenic	Likely Pathogenic	Pathogenic	NA	Hereditary breast and ovarian cancer syndrome;Breast-ovarian cancer, familial 2;Hereditary cancer-predisposing syndrome;not provided;Not Provided;Breast cancer;Breast Cancer	PVS1(stop_gained in susceptible gene BRCA2) -- PS1(Peptide change is known pathogenic) -- PM2(Low/absent allele frequency None<=0.0005)	T	stop_gained	HIGH	BRCA2	ENSG00000139618	Transcript	ENST00000380152	protein_coding	25/27	NA	ENST00000380152.3:c.9382N>T	ENSP00000369497.3:p.Arg3128Ter	9615	9382	3128	R/*	Cga/Tga	CM014328&rs80359212&COSM26820&COSM2071571	NA	1	NA	SNV	CCDS9344.1	ENSP00000369497
BRCA2	OV	13	32913620	32913623	TATG	-	frameshift_variant	ENST00000544455	13:g.32913620_32913623delTATG	ENST00000544455:c.5355_5358delTATG	ENSP00000439902:p.YV1710-1711X	0/1:33,22:55:99:740,0,1908	0	frameshift_variant	PM2,PVS1	NA	10	0	10	Pathogenic	Uncertain Significance	Pathogenic	NA	NA	PVS1(frameshift_variant in susceptible gene BRCA2) -- PM2(Low/absent allele frequency None<=0.0005)	-	frameshift_variant	HIGH	BRCA2	ENSG00000139618	Transcript	ENST00000380152	protein_coding	2018-11-27	NA	ENST00000380152.3:c.5128_5131delNNNN	ENSP00000369497.3:p.Tyr1710Ter	5361-5364	5128-5131	1710-1711	YV/X	TATGta/ta	rs760558178	NA	1	NA	deletion	CCDS9344.1	ENSP00000369497
BRCA2	OV	13	32912096	32912096	A	-	frameshift_variant	ENST00000544455	13:g.32912096_32912096delA	ENST00000544455:c.3831delA	ENSP00000439902:p.K1202X	0/1:30,21:51:99:514,0,817	0	frameshift_variant	PM2,PVS1	NA	10	0	10	NA	Uncertain Significance	Pathogenic	NA	NA	PVS1(frameshift_variant in susceptible gene BRCA2) -- PM2(Low/absent allele frequency None<=0.0005)	-	frameshift_variant	HIGH	BRCA2	ENSG00000139618	Transcript	ENST00000380152	protein_coding	2018-11-27	NA	ENST00000380152.3:c.3604delN	ENSP00000369497.3:p.Ser1203ValfsTer6	3837	3604	1202	K/X	Aaa/aa	NA	NA	1	NA	deletion	CCDS9344.1	ENSP00000369497
ATM	PRAD	11	108198392	108198395	TACA	-	frameshift_variant	ENST00000278616	11:g.108198392_108198395delTACA	ENST00000278616:c.7381_7384delTACA	ENSP00000278616:p.LT2332-2333X	0/1:38,32:70:99:1220,0,2096	0	frameshift_variant	PM2,PVS1	NA	10	0	10	likely_pathogenic&pathogenic	Uncertain Significance	Pathogenic	NA	NA	PVS1(frameshift_variant in susceptible gene ATM) -- PM2(Low/absent allele frequency None<=0.0005)	-	frameshift_variant	HIGH	ATM	ENSG00000149311	Transcript	ENST00000278616	protein_coding	48/63	NA	ENST00000278616.4:c.6996_6999delNNNN	ENSP00000278616.4:p.Tyr2334GlnfsTer4	7381-7384	6996-6999	2332-2333	LT/X	ctTACA/ct	rs763554569	NA	1	NA	deletion	CCDS31669.1	ENSP00000278616
ATM	PRAD	11	108141874	108141874	G	A	splice_donor_variant	ENST00000278616	11:g.108141874G>A	ENST00000278616:c.G>A	ENSP00000278616:p.	0/1:22,22:44:99:643,0,644	0	splice_donor_variant	PM2,PS1,PVS1	NA	17	0	17	likely_pathogenic&pathogenic	Likely Pathogenic	Pathogenic	NA	Hereditary cancer-predisposing syndrome;Ataxia-telangiectasia syndrome;not provided;Not Provided	PVS1(splice_donor_variant in susceptible gene ATM) -- PS1(Peptide change is known pathogenic) -- PM2(Low/absent allele frequency None<=0.0005)	A	splice_donor_variant	HIGH	ATM	ENSG00000149311	Transcript	ENST00000278616	protein_coding	NA	19/62	ENST00000278616.4:c.2921+1N>A	NA	NA	NA	NA	NA	NA	CS991304&COSM146161&COSM1135094	NA	1	NA	SNV	CCDS31669.1	ENSP00000278616
ATM	PRAD	11	108236086	108236086	C	T	missense_variant	ENST00000278616	11:g.108236086C>T	ENST00000278616:c.9407C>T	ENSP00000278616:p.R3008C	0/1:44,42:86:99:1226,0,1227	0	missense_variant	PM2,PM5,PP2,PS1	NA	12	0	12	likely_pathogenic&pathogenic	Likely Pathogenic	Pathogenic	NA	Hereditary cancer-predisposing syndrome;Ataxia-telangiectasia syndrome;not provided;Not Provided	PS1(Peptide change is known pathogenic) -- PM2(Low/absent allele frequency None<=0.0005) -- PM5(Peptide change at the same location of a known pathogenic change) -- PP2(Missense variant in gene from gene list)	T	missense_variant	MODERATE	ATM	ENSG00000149311	Transcript	ENST00000278616	protein_coding	63/63	NA	ENST00000278616.4:c.9022N>T	ENSP00000278616.4:p.Arg3008Cys	9407	9022	3008	R/C	Cgt/Tgt	CM000656&rs587782292&COSM1561110&COSM21642&COSM1351056&COSM1561109	NA	1	NA	SNV	CCDS31669.1	ENSP00000278616
FH	KIRP	1	241672087	241672087	T	A	splice_acceptor_variant	ENST00000366560	1:g.241672087T>A	ENST00000366560:c.T>A	ENSP00000355518:p.	0/1:29,23:52:99:710,0,830	0	splice_acceptor_variant	PM2,PVS1	NA	10	0	10	likely_pathogenic&pathogenic	Uncertain Significance	Pathogenic	NA	NA	PVS1(splice_acceptor_variant in susceptible gene FH) -- PM2(Low/absent allele frequency None<=0.0005)	A	splice_acceptor_variant	HIGH	FH	ENSG00000091483	Transcript	ENST00000366560	protein_coding	NA	2018-04-09	ENST00000366560.3:c.556-2N>T	NA	NA	NA	NA	NA	NA	rs750273092	NA	-1	NA	SNV	CCDS1617.1	ENSP00000355518
FH	KIRP	1	241672081	241672081	G	C	stop_gained	ENST00000366560	1:g.241672081G>C	ENST00000366560:c.599G>C	ENSP00000355518:p.S187*	0/1:46,42:88:99:1134,0,1385	0	stop_gained	PM2,PVS1	NA	10	0	10	Pathogenic	Uncertain Significance	Pathogenic	NA	NA	PVS1(stop_gained in susceptible gene FH) -- PM2(Low/absent allele frequency None<=0.0005)	C	stop_gained	HIGH	FH	ENSG00000091483	Transcript	ENST00000366560	protein_coding	2018-05-10	NA	ENST00000366560.3:c.560N>G	ENSP00000355518.3:p.Ser187Ter	599	560	187	S/*	tCa/tGa	rs398123166&CM031673	NA	-1	NA	SNV	CCDS1617.1	ENSP00000355518
PTEN	UCEC	10	89717719	89717720	TG	-	frameshift_variant	ENST00000371953	10:g.89717719_89717720delTG	ENST00000371953:c.2101_2102delTG	ENSP00000361021:p.PV248-249PX	0/1:25,16:41:99:550,0,916	0	frameshift_variant	PM2,PVS1	NA	10	0	10	Pathogenic	Uncertain Significance	Pathogenic	NA	NA	PVS1(frameshift_variant in susceptible gene PTEN) -- PM2(Low/absent allele frequency None<=0.0005)	-	frameshift_variant	HIGH	PTEN	ENSG00000171862	Transcript	ENST00000371953	protein_coding	2018-07-09	NA	ENST00000371953.3:c.744_745delNN	ENSP00000361021.3:p.Cys250TrpfsTer2	2101-2102	744-745	248-249	PV/PX	ccTGtg/cctg	rs780264945&COSM166165	NA	1	NA	deletion	CCDS31238.1	ENSP00000361021
PTEN	UCEC	10	89624305	89624305	T	A	missense_variant	ENST00000371953	10:g.89624305T>A	ENST00000371953:c.1436T>A	ENSP00000361021:p.Y27N	0/1:26,7:33:99:113,0,794	0	missense_variant	PM2,PP2,PP3,PS1	NA	11	0	11	NA	Likely Pathogenic	Pathogenic	NA	Hereditary cancer-predisposing syndrome;Hereditary cancer-predisposing syndrome	PS1(Peptide change is known pathogenic) -- PM2(Low/absent allele frequency None<=0.0005) -- PP2(Missense variant in gene from gene list) -- PP3(Multiple (>=2) in silico predictions of deliterious effect=SIFT:0.01<0.05|PolyPhen:0.722>0.432)	A	missense_variant&splice_region_variant	MODERATE	PTEN	ENSG00000171862	Transcript	ENST00000371953	protein_coding	2018-01-09	NA	ENST00000371953.3:c.79N>A	ENSP00000361021.3:p.Tyr27Asn	1436	79	27	Y/N	Tat/Aat	rs746128825&COSM5268&COSM163810&COSM1561215	NA	1	NA	SNV	CCDS31238.1	ENSP00000361021
SDHB	PCPG	1	17355166	17355170	CAATC	-	frameshift_variant	ENST00000375499	1:g.17355166_17355170delCAATC	ENST00000375499:c.499_503delCAATC	ENSP00000364649:p.RID116-118RX	0/1:53,51:104:99:1910,0,2309	0	frameshift_variant	PM2,PVS1	NA	10	0	10	NA	Uncertain Significance	Pathogenic	NA	NA	PVS1(frameshift_variant in susceptible gene SDHB) -- PM2(Low/absent allele frequency None<=0.0005)	-	frameshift_variant	HIGH	SDHB	ENSG00000117118	Transcript	ENST00000375499	protein_coding	2018-04-08	NA	ENST00000375499.3:c.348_352delNNNNN	ENSP00000364649.3:p.Ile117HisfsTer5	499-503	348-352	116-118	RID/RX	agGATTGac/agac	NA	NA	-1	NA	deletion	CCDS176.1	ENSP00000364649
SDHB	PCPG	1	17371320	17371320	G	A	stop_gained	ENST00000375499	1:g.17371320G>A	ENST00000375499:c.287G>A	ENSP00000364649:p.R46*	0/1:26,24:50:99:726,0,803	0	stop_gained	PM2,PVS1	NA	10	0	10	Pathogenic	Uncertain Significance	Pathogenic	NA	NA	PVS1(stop_gained in susceptible gene SDHB) -- PM2(Low/absent allele frequency None<=0.0005)	A	stop_gained	HIGH	SDHB	ENSG00000117118	Transcript	ENST00000375499	protein_coding	2018-02-08	NA	ENST00000375499.3:c.136N>T	ENSP00000364649.3:p.Arg46Ter	287	136	46	R/*	Cga/Tga	CM020966&CM030519&rs74315370&COSM677083	NA	-1	NA	SNV	CCDS176.1	ENSP00000364649
VHL	KIRC	3	10191492	10191492	G	T	missense_variant	ENST00000256474	3:g.10191492G>T	ENST00000256474:c.1325G>T	ENSP00000256474:p.C162F	0/1:127,123:250:99:2978,0,2991	0	missense_variant	PM2,PP2,PS1	NA	10	0	10	Pathogenic	Likely Pathogenic	Pathogenic	NA	Von Hippel-Lindau syndrome	PS1(Peptide change is known pathogenic) -- PM2(Low/absent allele frequency None<=0.0005) -- PP2(Missense variant in gene from gene list)	T	missense_variant	MODERATE	VHL	ENSG00000134086	Transcript	ENST00000256474	protein_coding	2018-03-03	NA	ENST00000256474.2:c.485N>T	ENSP00000256474.2:p.Cys162Phe	1325	485	162	C/F	tGc/tTc	rs397516444&CM951292&CM951291&COSM25676&COSM14408	NA	1	NA	SNV	CCDS2597.1	ENSP00000256474
VHL	KIRC	3	10191492	10191492	G	T	missense_variant	ENST00000256474	3:g.10191492G>T	ENST00000256474:c.1325G>T	ENSP00000256474:p.C162F	0/1:30,40:70:99:1138,0,840	0	missense_variant	PM2,PP2,PS1	NA	10	0	10	Pathogenic	Likely Pathogenic	Pathogenic	NA	Von Hippel-Lindau syndrome	PS1(Peptide change is known pathogenic) -- PM2(Low/absent allele frequency None<=0.0005) -- PP2(Missense variant in gene from gene list)	T	missense_variant	MODERATE	VHL	ENSG00000134086	Transcript	ENST00000256474	protein_coding	2018-03-03	NA	ENST00000256474.2:c.485N>T	ENSP00000256474.2:p.Cys162Phe	1325	485	162	C/F	tGc/tTc	rs397516444&CM951292&CM951291&COSM25676&COSM14408	NA	1	NA	SNV	CCDS2597.1	ENSP00000256474
BRIP1	STAD	17	59760742	59760743	-	C	frameshift_variant	ENST00000259008	17:g.59760742_59760743insC	ENST00000259008:c.3932_3933insC	ENSP00000259008:p.E1222GX	0/1:7,6:13:99:175,0,211	0	frameshift_variant	PM2,PVS1	NA	10	0	10	NA	Uncertain Significance	Pathogenic	NA	NA	PVS1(frameshift_variant in susceptible gene BRIP1) -- PM2(Low/absent allele frequency None<=0.0005)	C	frameshift_variant	HIGH	BRIP1	ENSG00000136492	Transcript	ENST00000259008	protein_coding	20/20	NA	ENST00000259008.2:c.3664_3665insG	ENSP00000259008.2:p.Glu1222GlyfsTer7	3932-3933	3664-3665	1222	E/GX	gaa/gGaa	NA	NA	-1	NA	insertion	CCDS11631.1	ENSP00000259008
BRIP1	STAD	17	59861685	59861685	A	-	frameshift_variant	ENST00000259008	17:g.59861685_59861685delA	ENST00000259008:c.1842delA	ENSP00000259008:p.I525X	0/1:103,101:204:99:3301,0,3514	0	frameshift_variant	PM2,PVS1	NA	10	0	10	NA	Uncertain Significance	Pathogenic	NA	NA	PVS1(frameshift_variant in susceptible gene BRIP1) -- PM2(Low/absent allele frequency None<=0.0005)	-	frameshift_variant	HIGH	BRIP1	ENSG00000136492	Transcript	ENST00000259008	protein_coding	2018-11-20	NA	ENST00000259008.2:c.1574delN	ENSP00000259008.2:p.Ile525LysfsTer65	1842	1574	525	I/X	aTa/aa	rs772248310	NA	-1	NA	deletion	CCDS11631.1	ENSP00000259008
POLE	LIHC	12	133202825	133202825	C	A	stop_gained	ENST00000320574	12:g.133202825C>A	ENST00000320574:c.6453C>A	ENSP00000322570:p.E2137*	0/1:81,87:168:99:2434,0,2204	0	stop_gained	PM2,PVS1	NA	10	0	10	NA	Uncertain Significance	Pathogenic	NA	NA	PVS1(stop_gained in susceptible gene POLE) -- PM2(Low/absent allele frequency None<=0.0005)	A	stop_gained	HIGH	POLE	ENSG00000177084	Transcript	ENST00000320574	protein_coding	46/49	NA	ENST00000320574.5:c.6409N>T	ENSP00000322570.5:p.Glu2137Ter	6453	6409	2137	E/*	Gag/Tag	NA	NA	-1	NA	SNV	CCDS9278.1	ENSP00000322570
POLE	LIHC	12	133235914	133235924	GAGATGATGTA	-	frameshift_variant	ENST00000320574	12:g.133235914_133235924delGAGATGATGTA	ENST00000320574:c.3276_3286delGAGATGATGTA	ENSP00000322570:p.YIIS1078-1081X	0/1:33,32:65:99:1299,0,1283	0	frameshift_variant	PM2,PVS1	NA	10	0	10	NA	Uncertain Significance	Pathogenic	NA	NA	PVS1(frameshift_variant in susceptible gene POLE) -- PM2(Low/absent allele frequency None<=0.0005)	-	frameshift_variant	HIGH	POLE	ENSG00000177084	Transcript	ENST00000320574	protein_coding	26/49	NA	ENST00000320574.5:c.3232_3242delNNNNNNNNNNN	ENSP00000322570.5:p.Tyr1078ProfsTer42	3276-3286	3232-3242	1078-1081	YIIS/X	TACATCATCTCc/c	rs763470055	NA	-1	NA	deletion	CCDS9278.1	ENSP00000322570
RECQL	STAD	12	21630784	21630784	A	-	frameshift_variant	ENST00000444129	12:g.21630784_21630784delA	ENST00000444129:c.1289delA	ENSP00000416739:p.C274X	0/1:11,8:19:99:267,0,376	0	frameshift_variant	PM2,PVS1	NA	10	0	10	NA	Uncertain Significance	Pathogenic	NA	NA	PVS1(frameshift_variant in susceptible gene RECQL) -- PM2(Low/absent allele frequency None<=0.0005)	-	frameshift_variant	HIGH	RECQL	ENSG00000004700	Transcript	ENST00000421138	protein_coding	2018-08-16	NA	ENST00000421138.2:c.820delN	ENSP00000395449.2:p.Cys274ValfsTer32	1050	820	274	C/X	Tgt/gt	NA	NA	-1	NA	deletion	CCDS31756.1	ENSP00000395449
RECQL	STAD	12	21628711	21628714	AACT	-	frameshift_variant	ENST00000444129	12:g.21628708_21628711delAACT	ENST00000444129:c.1466_1469delAACT	ENSP00000416739:p.SL333-334X	0/1:7,8:15:99:315,0,356	0	frameshift_variant	PM2,PVS1	NA	10	0	10	NA	Uncertain Significance	Pathogenic	NA	NA	PVS1(frameshift_variant in susceptible gene RECQL) -- PM2(Low/absent allele frequency None<=0.0005)	-	frameshift_variant	HIGH	RECQL	ENSG00000004700	Transcript	ENST00000421138	protein_coding	2018-10-16	NA	ENST00000421138.2:c.997_1000delNNNN	ENSP00000395449.2:p.Ser333CysfsTer34	1227-1230	997-1000	333-334	SL/X	AGTTtg/tg	rs779556696	NA	-1	NA	deletion	CCDS31756.1	ENSP00000395449
[truncated: 80 more columns]

## Sheet: S4b.SomaticSecondHit
Ancestry	Gene	Cancer	Germline Variant	Somatic 2nd Hit
AFR	BRCA2	LUSC	p.-3082fs	NA
AFR	BRCA2	LUSC	p.R3128*	LOH
AFR	BRCA2	OV	p.Y1710fs	LOH
AFR	BRCA2	OV	p.K1202*	LOH
AFR	ATM	PRAD	p.L2332fs	p.E2164K
AFR	ATM	PRAD	c.2921+1G>A	LOH
AFR	ATM	PRAD	p.R3008C	NA
AFR	FH	KIRP	c.556-2A>T	LOH
AFR	FH	KIRP	p.S187*	c.1390+6T>A
AFR	PTEN	UCEC	p.P248fs	NA
AFR	PTEN	UCEC	p.Y27N	NA
AFR	SDHB	PCPG	p.R116fs	LOH
AFR	SDHB	PCPG	p.R46*	LOH
AFR	VHL	KIRC	p.C162F	p.E186*
AFR	VHL	KIRC	p.C162F	NA
EAS	BRIP1	STAD	p.E1222fs	NA
EAS	BRIP1	STAD	p.I525*	NA
EAS	POLE	LIHC	p.E2137*	LOH
EAS	POLE	LIHC	p.Y1078fs	NA
EAS	RECQL	STAD	p.C274*	NA
EAS	RECQL	STAD	p.S333fs	NA

## Sheet: S5a.ExpressionEffect
cancer	gene	gene_path_count	wilcoxP	W_stat	degrees_freedom	deviance	residual_degrees_freedom	residual_deviance	F_statistic	p.value	coefficient	ancestry	FDR	wilcoxFDR
KIRP	FH	2	0.0172377	568	1	11.412	287	116.862	28.0266	2.38232e-07	-2.39703	AFR	1.90585e-06	0.106688
PCPG	SDHB	2	0.0266721	339	1	7.29071	177	52.6051	24.531	1.69827e-06	-1.92004	AFR	6.79308e-06	0.106688
BRCA	BRCA2	2	0.0653268	1910	1	4.62389	1089	1628.73	3.09162	0.0789774	-1.5219	AFR	0.210606	0.174205
BRCA	BRCA1	2	0.246896	1605	1	0.954874	1089	1243.19	0.836444	0.360618	-0.691602	AFR	0.571046	0.332876
BRCA	ATR	2	0.249657	1602	1	0.198864	1089	344.878	0.627939	0.428285	-0.315618	AFR	0.571046	0.332876
KIRC	VHL	2	0.169548	231	1	0.572247	529	272.389	1.11135	0.29227	0.535915	AFR	0.571046	0.332876
PRAD	ATM	2	0.647958	393	1	0.124926	484	229.265	0.263731	0.607803	0.250442	AFR	0.694632	0.740523
LUSC	BRCA2	2	0.869768	533	1	0.0233364	499	360.617	0.0322915	0.857462	-0.108236	AFR	0.857462	0.869768
LUAD	GJB2	3	0.630874	845	1	2.63318	486	1774.28	0.721266	0.396147	-0.939764	EAS	0.396147	0.630874

## Sheet: S5b.SomaticRNAseq
Ancestry	HUGO_Symbol	cancer	hg38_pos	WESnormalVAF	WEStumorVAF	log2RSEM	expressionQuantile	RNAseq_TumorVAF	Somatic 2nd hit	Chromosome	Start	Stop	Reference	Alternate	Variant_Classification	HGVSc	HGVSp	CharGer_Classification
AFR	ATM	PRAD	chr11:108327668-108327668	0.463768	0.528571	10.4952	0.899384	0.12	p.E2164K	11	108198392	108198395	TACA	-	frameshift_variant	ENST00000278616:c.7381_7384delTACA	ENSP00000278616:p.LT2332-2333X	Pathogenic
AFR	BRCA2	OV	chr13:32339486-32339486	0.345455	0.909091	5.45266	0.0641509	0	LOH	13	32913620	32913623	TATG	-	frameshift_variant	ENST00000544455:c.5355_5358delTATG	ENSP00000439902:p.YV1710-1711X	Pathogenic
AFR	BRCA2	LUSC	chr13:32380136-32380136	0.244444	0.466667	6.61882	0.157685	0	NA	13	32954272	32954273	-	A	frameshift_variant	ENST00000544455:c.9473_9474insA	ENSP00000439902:p.-3082-3083X	Pathogenic
AFR	FH	KIRP	chr1:241508787-241508787	0.442308	0.87037	7.60765	0.0103448	NA	LOH	1	241672087	241672087	T	A	splice_acceptor_variant	ENST00000366560:c.T>A	ENSP00000355518:p.	Pathogenic
AFR	FH	KIRP	chr1:241508781-241508781	0.472527	0.476923	9.01955	0.0206897	0.13	p.X464_splice	1	241672081	241672081	G	C	stop_gained	ENST00000366560:c.599G>C	ENSP00000355518:p.S187*	Pathogenic
AFR	SDHB	PCPG	chr1:17028675-17028675	0.418367	0.714286	6.77977	0.00543478	0.25	LOH	1	17355166	17355170	CAATC	-	frameshift_variant	ENST00000375499:c.499_503delCAATC	ENSP00000364649:p.RID116-118RX	Pathogenic
AFR	SDHB	PCPG	chr1:17044825-17044825	0.470588	0.735294	9.41026	0.0978261	0.8	LOH	1	17371320	17371320	G	A	stop_gained	ENST00000375499:c.287G>A	ENSP00000364649:p.R46*	Pathogenic
AFR	VHL	KIRC	chr3:10149808-10149808	0.488095	0.50303	9.09695	0.896617		p.E186*	3	10191492	10191492	G	T	missense_variant	ENST00000256474:c.1325G>T	ENSP00000256474:p.C162F	Pathogenic
EAS	POLE	LIHC	chr12:132626239-132626239	0.517857	0.70229	NA	NA	0.5	LOH	12	133202825	133202825	C	A	stop_gained	ENST00000320574	ENSP00000322570:p.E2137*	Pathogenic
AFR	APC	BRCA	chr5:112792531-112792531	0.464286	0.608696	8.7994	0.138434	NA	LOH	5	112128228	112128228	T	-	splice_donor_variant	ENST00000457016:c.delT	ENSP00000413133:p.	Pathogenic
AFR	ATM	BLCA	chr11:108227627-108227627	0.5	0.532258	9.97324	0.87395	0.67	p.R982C	11	108098354	108098354	G	A	start_lost	ENST00000278616:c.388G>A	ENSP00000278616:p.M1I	Pathogenic
AFR	BAP1	KIRC	chr3:52402608-52402608	0.503876	0.666667	10.6902	0.889098	0.8	LOH	3	52436624	52436624	G	A	stop_gained	ENST00000460680:c.2522G>A	ENSP00000417132:p.Q684*	Pathogenic
AFR	BRCA1	BRCA	chr17:43094477-43094477	0.395062	0.8	7.13549	0.0974499	1	LOH	17	41246494	41246494	C	A	stop_gained	ENST00000471181:c.1286C>A	ENSP00000418960:p.E352*	Pathogenic
AFR	BRCA2	BRCA	chr13:32329469-32329469	0.357143	0.472222	5.10015	0.0582878	0	NA	13	32903605	32903606	TG	-	frameshift_variant	ENST00000544455:c.884_885delTG	ENSP00000439902:p.TV219-220TX	Pathogenic
AFR	BRCA2	BRCA	chr13:32394726-32394726	0.519231	0.826087	6.165	0.188525	0.8	LOH	13	32968863	32968863	C	G	stop_gained	ENST00000544455:c.9521C>G	ENSP00000439902:p.Y3098*	Pathogenic
AFR	BUB1B	UCEC	chr15:40217580-40217580	0.359375	0.653061	8.04795	0.141176	0.62	LOH	15	40509781	40509781	G	C	missense_variant	ENST00000287598:c.2958G>C	ENSP00000287598:p.Q921H	Pathogenic
AFR	PALB2	COAD	chr16:23635788-23635788	0.50495	0.620253	8.3292	0.161172	0.5	LOH	16	23647108	23647109	-	A	frameshift_variant	ENST00000261584:c.911_912insA	ENSP00000261584:p.L253LX	Pathogenic
AFR	PALB2	PCPG	chr16:23638099-23638099	0.540741	0.425287	8.88994	1	0.63	NA	16	23649420	23649420	C	A	stop_gained	ENST00000261584:c.232C>A	ENSP00000261584:p.E27*	Pathogenic
AFR	RET	KIRP	chr10:43114491-43114491	0.552239	0.554054	4.3495	0.844828	0	NA	10	43609939	43609939	G	T	missense_variant	ENST00000355710:c.2123G>T	ENSP00000347942:p.D631Y	Pathogenic
AFR	RET	PCPG	chr10:43114501-43114501	0.545455	0.411765	15.2391	0.918478	0.6	NA	10	43609949	43609949	G	A	missense_variant	ENST00000355710:c.2133G>A	ENSP00000347942:p.C634Y	Pathogenic
AMR	NF1	BRCA	chr17:31214524-31214524	0.38009	0.291866	7.51595	0.00182149	0	NA	17	29541542	29541542	A	G	missense_variant	ENST00000358273:c.1849A>G	ENSP00000351015:p.Y489C	Pathogenic
EAS	BRCA2	SARC	chr13:32356472-32356472	0.4	0.590909	4.31993	0.0421456	0	NA	13	32930609	32930609	C	T	stop_gained	ENST00000544455:c.7707C>T	ENSP00000439902:p.R2494*	Pathogenic
EAS	PALB2	LIHC	chr16:23621479-23621479	0.48	0.863636	6.70018	0.0520446	NA	LOH	16	23632800	23632800	C	G	splice_acceptor_variant	ENST00000261584:c.C>G	ENSP00000261584:p.	Pathogenic
EAS	ATM	BRCA	chr11:108312424-108312424	0.511628	0.807692	8.6901	0.0765027	0.67	LOH	11	108183151	108183151	G	T	stop_gained	ENST00000278616:c.6317G>T	ENSP00000278616:p.E1978*	Pathogenic
EAS	ATM	LIHC	chr11:108259022-108259022	0.42	0.901099	8.53761	0.185874	0	LOH	11	108129749	108129749	C	T	stop_gained	ENST00000278616:c.2798C>T	ENSP00000278616:p.R805*	Pathogenic
EAS	BRCA2	BRCA	chr13:32379793-32379793	0.464286	0.357143	6.19899	0.195811	0.67	NA	13	32953929	32953930	TG	-	frameshift_variant	ENST00000544455:c.9223_9224delTG	ENSP00000439902:p.L2999X	Pathogenic
EAS	BAP1	LUAD	chr3:52403800-52403800	0.492308	0.493976	10.9071	0.877551	NA	NA	3	52437816	52437816	C	T	splice_donor_variant	ENST00000469613:c.C>T	ENSP00000418320:p.	Pathogenic
	Predisposing variants in this study

## Sheet: S6a.PowerSKAT
No. of Samples	OR1	OR2	OR3	OR4	OR5	OR6	OR7	OR8	OR9	OR10
1	4.87766e-05	6.40957e-05	6.10893e-05	5.73528e-05	5.52832e-05	5.65532e-05	4.80216e-05	5.41969e-05	5.21522e-05	6.04761e-05
2	0.000109855	0.000154274	0.0001559	0.000142179	0.000146681	0.000146939	0.000125321	0.000134888	0.000139461	0.000159476
3	0.000167149	0.000250345	0.000268727	0.000241289	0.0002649	0.000261773	0.000231467	0.000230974	0.000258185	0.000291428
4	0.000218269	0.000347191	0.000396363	0.000353081	0.000405815	0.000397628	0.000371251	0.000340776	0.000410305	0.000456884
5	0.000263412	0.000443601	0.000539068	0.000477837	0.00056757	0.000554044	0.00055206	0.000465326	0.000599721	0.000661221
6	0.000303293	0.000539618	0.000698483	0.000615966	0.000749663	0.000731818	0.000782602	0.000606516	0.000831952	0.000912961
7	0.000338666	0.000635643	0.00087704	0.000767829	0.000952399	0.000932265	0.00107226	0.00076654	0.00111403	0.00122237
8	0.000370204	0.000732126	0.00107766	0.000933775	0.00117654	0.0011569	0.00143057	0.000947667	0.00145425	0.00160007
9	0.000398476	0.000829463	0.0013035	0.00111417	0.00142309	0.00140727	0.0018668	0.00115214	0.0018618	0.00205567
10	0.000423957	0.000927976	0.00155776	0.00130939	0.0016932	0.00168491	0.00238944	0.00138215	0.00234632	0.00259673
11	0.000447038	0.00102792	0.00184351	0.00151986	0.00198809	0.0019913	0.0030059	0.00163979	0.00291738	0.00322798
12	0.000468045	0.00112949	0.00216351	0.00174597	0.002309	0.00232785	0.00372219	0.00192711	0.00358392	0.00395109
13	0.000487248	0.00123284	0.00252014	0.00198814	0.00265721	0.00269591	0.0045427	0.00224613	0.00435379	0.00476479
14	0.000504875	0.00133808	0.00291537	0.00224675	0.00303399	0.00309672	0.00547012	0.0025988	0.00523336	0.00566531
15	0.000521115	0.00144532	0.00335065	0.00252217	0.0034406	0.00353146	0.00650545	0.00298713	0.00622717	0.00664702
16	0.000536129	0.00155463	0.00382697	0.00281471	0.00387831	0.00400123	0.00764808	0.00341309	0.00733777	0.00770313
17	0.000550054	0.00166607	0.00434488	0.00312467	0.00434837	0.00450701	0.00889597	0.00387868	0.00856565	0.00882635
18	0.000563008	0.0017797	0.00490449	0.00345228	0.004852	0.00504973	0.0102458	0.00438595	0.00990924	0.0100095
19	0.000575092	0.00189557	0.00550556	0.0037977	0.00539051	0.00563024	0.0116933	0.00493694	0.011365	0.0112458
20	0.000586392	0.00201372	0.00614753	0.00416107	0.00596593	0.00624928	0.0132336	0.00553371	0.0129277	0.0125295
21	0.000596984	0.00213418	0.0068296	0.00454244	0.00657836	0.00690756	0.0148611	0.00617832	0.0145906	0.0138557
22	0.000606934	0.00225701	0.00755099	0.00494182	0.00722883	0.00760567	0.0165704	0.00687282	0.0163456	0.0152208
23	0.0006163	0.00238224	0.00831021	0.00535917	0.00791833	0.00834417	0.0183558	0.00761922	0.018184	0.0166221
24	0.000625133	0.0025099	0.00910596	0.00579437	0.00864774	0.00912354	0.0202122	0.00841946	0.0200965	0.018058
25	0.000633477	0.00264003	0.00993681	0.00624728	0.00941789	0.00994422	0.0221348	0.00927542	0.0220739	0.0195279
26	0.000641373	0.00277266	0.0108014	0.00671769	0.0102295	0.0108066	0.0241192	0.0101888	0.0241071	0.0210317
27	0.000648856	0.00290784	0.0116985	0.00720535	0.0110831	0.0117109	0.0261616	0.0111613	0.026188	0.0225703
28	0.000655958	0.00304558	0.0126266	0.00770997	0.0119791	0.0126576	0.0282593	0.0121943	0.0283095	0.0241452
29	0.000662707	0.00318618	0.0135835	0.00823124	0.012918	0.0136467	0.0304098	0.013289	0.0304656	0.0257578
30	0.000669128	0.0033296	0.0145676	0.00876878	0.0138997	0.0146786	0.0326116	0.0144463	0.0326522	0.0274098
31	0.000675245	0.00347568	0.0155771	0.00932224	0.0149244	0.0157534	0.0348634	0.0156671	0.0348664	0.0291031
32	0.000681078	0.00362445	0.0166101	0.0098912	0.0159917	0.0168715	0.0371646	0.0169518	0.0371071	0.0308396
33	0.000686645	0.00377593	0.0176647	0.0104755	0.0171013	0.0180327	0.0395144	0.0183003	0.0393746	0.0326212
34	0.000691965	0.00393019	0.0187391	0.0110744	0.0182527	0.0192372	0.0419126	0.0197124	0.0416703	0.0344497
35	0.000697052	0.0040876	0.0198307	0.0116875	0.0194449	0.0204851	0.0443585	0.0211874	0.0439966	0.036327
36	0.000701921	0.00424779	0.0209373	0.0123144	0.0206771	0.0217761	0.0468515	0.0227244	0.0463564	0.0382545
37	0.000706584	0.00441077	0.0220562	0.0129546	0.0219478	0.0231099	0.0493904	0.0243218	0.0487526	0.0402337
38	0.000711054	0.00457662	0.0231848	0.0136077	0.0232559	0.0244866	0.0519737	0.0259778	0.0511882	0.0422657
39	0.000715342	0.00474529	0.0243202	0.0142732	0.0245994	0.0259061	0.0545994	0.0276901	0.0536656	0.0443516
40	0.000719457	0.00491678	0.0254594	0.0149506	0.0259764	0.0273682	0.0572647	0.0294563	0.0561866	0.0464922
41	0.000723409	0.00509129	0.0265992	0.0156399	0.0273848	0.0288727	0.0599663	0.0312734	0.0587522	0.048688
42	0.000727206	0.00526912	0.0277366	0.0163403	0.0288223	0.0304196	0.0627003	0.0331383	0.0613626	0.0509394
43	0.000730857	0.0054498	0.0288678	0.0170513	0.0302864	0.0320086	0.0654621	0.0350477	0.0640175	0.0532467
44	0.00073437	0.00563332	0.0299894	0.0177726	0.031774	0.0336394	0.0682465	0.0369982	0.0667157	0.05561
45	0.00073775	0.00581967	0.0310984	0.0185038	0.0332817	0.0353117	0.0710479	0.0389865	0.0694558	0.0580292
46	0.000741004	0.00600884	0.0321916	0.0192445	0.0348063	0.037025	0.0738604	0.0410094	0.0722357	0.060504
47	0.000744139	0.00620084	0.033266	0.0199945	0.0363442	0.0387789	0.0766775	0.0430642	0.0750534	0.0630342
48	0.00074716	0.00639564	0.0343189	0.0207532	0.0378919	0.040573	0.0794929	0.0451486	0.0779067	0.0656194
49	0.000750072	0.00659324	0.0353481	0.0215205	0.0394454	0.0424067	0.0822999	0.0472612	0.0807935	0.0682588
50	0.00075288	0.00679364	0.0363522	0.0222961	0.0410009	0.0442793	0.0850922	0.049401	0.0837117	0.070952
51	0.000755589	0.00699681	0.0373304	0.0230797	0.0425546	0.0461904	0.087864	0.0515682	0.0866592	0.0736981
52	0.000758204	0.00720293	0.0382825	0.0238713	0.0441024	0.0481392	0.0906095	0.0537642	0.0896342	0.0764964
53	0.000760728	0.00741179	0.0392094	0.0246704	0.0456408	0.050125	0.0933237	0.0559918	0.0926347	0.0793458
54	0.000763165	0.00762336	0.0401123	0.0254767	0.0471661	0.052147	0.0960027	0.0582545	0.0956589	0.0822453
55	0.000765519	0.00783762	0.0409936	0.02629	0.0486753	0.0542043	0.0986434	0.060557	0.0987053	0.0851938
56	0.000767794	0.00805454	0.0418558	0.0271103	0.0501655	0.0562961	0.101244	0.0629046	0.101772	0.08819
57	0.000769993	0.00827409	0.0427023	0.0279374	0.0516347	0.0584215	0.103805	0.0653012	0.104858	0.0912326
58	0.000772118	0.00849626	0.0435365	0.028771	0.0530813	0.0605795	0.106326	0.0677476	0.107961	0.0943201
59	0.000774173	0.008721	0.0443621	0.029611	0.054505	0.062769	0.108812	0.0702424	0.11108	0.0974507
60	0.000776161	0.0089483	0.0451825	0.0304572	0.055906	0.064989	0.111268	0.072784	0.114213	0.100623
61	0.000778084	0.00917811	0.0460007	0.0313095	0.0572858	0.0672384	0.113699	0.0753707	0.11736	0.103835
62	0.000779944	0.00941041	0.0468195	0.0321679	0.0586469	0.0695159	0.116116	0.0780004	0.120518	0.107084
63	0.000781745	0.00964516	0.0476406	0.0330321	0.059993	0.0718205	0.118526	0.0806714	0.123687	0.110368
64	0.000783489	0.00988232	0.0484657	0.0339022	0.0613284	0.0741508	0.120928	0.0833819	0.126865	0.113686
65	0.000785177	0.0101219	0.0492955	0.0347781	0.0626582	0.0765056	0.123326	0.0861299	0.13005	0.117034
66	0.000786812	0.0103637	0.0501304	0.0356595	0.0639874	0.0788836	0.125719	0.0889137	0.133242	0.120409
67	0.000788396	0.0106079	0.0509704	0.0365465	0.0653207	0.0812836	0.128109	0.0917315	0.136439	0.12381
68	0.00078993	0.0108544	0.0518155	0.0374391	0.0666609	0.0837042	0.130497	0.0945813	0.139639	0.127234
69	0.000791417	0.0111031	0.0526658	0.0383371	0.0680084	0.0861443	0.132883	0.0974616	0.142842	0.130677
70	0.000792858	0.0113539	0.0535212	0.0392406	0.0693636	0.0886024	0.135268	0.10037	0.146047	0.134137
71	0.000794255	0.0116069	0.0543817	0.0401495	0.0707267	0.0910773	0.137652	0.103306	0.149252	0.137612
72	0.000795609	0.011862	0.0552471	0.0410637	0.0720979	0.0935678	0.140033	0.106266	0.152457	0.141099
73	0.000796923	0.0121191	0.0561175	0.0419832	0.0734776	0.0960724	0.142412	0.10925	0.15566	0.144596
74	0.000798197	0.0123782	0.0569926	0.042908	0.0748657	0.09859	0.144786	0.112256	0.158861	0.148102
75	0.000799432	0.0126393	0.0578726	0.043838	0.0762624	0.101119	0.147153	0.115281	0.162058	0.151616
76	0.000800631	0.0129023	0.0587572	0.0447733	0.0776677	0.103659	0.14951	0.118325	0.165252	0.155137
77	0.000801794	0.0131672	0.0596461	0.0457138	0.0790817	0.106209	0.15185	0.121386	0.168442	0.158665
78	0.000802923	0.0134339	0.0605394	0.0466594	0.0805043	0.108766	0.154167	0.124463	0.171627	0.162202
79	0.000804019	0.0137023	0.0614369	0.0476101	0.0819353	0.111331	0.15645	0.127555	0.174808	0.165749
80	0.000805082	0.0139725	0.0623384	0.0485659	0.0833748	0.113902	0.158682	0.130659	0.177983	0.169309
81	0.000806115	0.0142443	0.0632437	0.0495268	0.0848225	0.116478	0.16083	0.133776	0.181154	0.172885
82	0.000807118	0.0145178	0.0641527	0.0504927	0.086278	0.119059	0.162966	0.136905	0.184319	0.176479
83	0.000808092	0.0147928	0.0650653	0.0514637	0.0877411	0.121643	0.165117	0.140045	0.18748	0.180095
84	0.000809038	0.0150694	0.0659813	0.0524396	0.0892114	0.12423	0.167286	0.143195	0.190635	0.183735
85	0.000809956	0.0153475	0.0669005	0.0534205	0.0906884	0.126819	0.16947	0.146355	0.193787	0.187399
86	0.000810849	0.0156269	0.0678227	0.0544063	0.0921718	0.129408	0.171672	0.149525	0.196934	0.191087
87	0.000811717	0.0159078	0.0687479	0.0553969	0.093661	0.131999	0.17389	0.152706	0.200077	0.194798
88	0.00081256	0.01619	0.0696758	0.0563922	0.0951556	0.134589	0.176124	0.1559	0.203217	0.198531
89	0.000813379	0.0164735	0.0706064	0.0573923	0.0966549	0.137179	0.178375	0.159106	0.206353	0.202284
90	0.000814176	0.0167582	0.0715393	0.0583971	0.0981585	0.139769	0.180642	0.162327	0.209487	0.206058
91	0.00081495	0.017044	0.0724746	0.0594064	0.0996657	0.142357	0.182925	0.165567	0.212617	0.20985
92	0.000815703	0.017331	0.0734121	0.0604204	0.101176	0.144943	0.185223	0.168828	0.215746	0.21366
93	0.000816435	0.0176191	0.0743516	0.0614388	0.102689	0.147528	0.187536	0.172109	0.218872	0.217487
94	0.000817147	0.0179082	0.0752929	0.0624617	0.104204	0.150112	0.189864	0.175412	0.221995	0.22133
95	0.00081784	0.0181982	0.076236	0.063489	0.10572	0.152693	0.192207	0.178735	0.225117	0.225187
96	0.000818514	0.0184892	0.0771808	0.0645206	0.107238	0.155272	0.194563	0.182078	0.228236	0.229058
97	0.000819169	0.0187811	0.0781272	0.0655565	0.108756	0.157849	0.196932	0.185441	0.231353	0.232941
98	0.000819807	0.0190738	0.0790749	0.0665965	0.110274	0.160424	0.199314	0.188823	0.234467	0.236836
99	0.000820428	0.0193672	0.0800239	0.0676407	0.111792	0.162998	0.201708	0.192224	0.237579	0.240741
100	0.000821032	0.0196614	0.080974	0.0686889	0.11331	0.165569	0.204113	0.195643	0.240688	0.244656
101	0.000821619	0.0199563	0.0819251	0.069741	0.114827	0.168139	0.206529	0.199081	0.243794	0.248579
102	0.000822192	0.0202518	0.0828772	0.070797	0.116343	0.170707	0.208954	0.202536	0.246896	0.252509
103	0.000822749	0.0205479	0.0838301	0.0718569	0.117859	0.173274	0.211388	0.206009	0.249994	0.256445
104	0.000823291	0.0208446	0.0847837	0.0729204	0.119374	0.175839	0.21383	0.209498	0.253088	0.260386
105	0.000823819	0.0211417	0.0857379	0.0739876	0.120888	0.178404	0.216278	0.213004	0.256179	0.264331
106	0.000824333	0.0214393	0.0866927	0.0750583	0.122402	0.180968	0.218731	0.216525	0.259264	0.26828
107	0.000824834	0.0217373	0.0876479	0.0761324	0.123916	0.183531	0.22119	0.220061	0.262346	0.27223
108	0.000825322	0.0220357	0.0886035	0.0772099	0.125429	0.186094	0.223651	0.223612	0.265423	0.276182
109	0.000825797	0.0223344	0.0895594	0.0782907	0.126944	0.188657	0.226114	0.227178	0.268495	0.280135
110	0.00082626	0.0226334	0.0905155	0.0793747	0.128459	0.19122	0.228577	0.230756	0.271564	0.284087
111	0.000826711	0.0229326	0.0914717	0.0804618	0.129976	0.193783	0.231039	0.234348	0.274629	0.288037
112	0.000827151	0.023232	0.092428	0.0815519	0.131494	0.196347	0.233499	0.237952	0.277691	0.291986
113	0.000827579	0.0235316	0.0933842	0.0826449	0.133015	0.198911	0.235955	0.241568	0.28075	0.295932
114	0.000827996	0.0238312	0.0943404	0.0837407	0.134538	0.201476	0.238405	0.245195	0.283808	0.299874
115	0.000828403	0.024131	0.0952964	0.0848392	0.136065	0.204042	0.240849	0.248832	0.286864	0.303812
116	0.000828799	0.0244307	0.0962523	0.0859404	0.137594	0.206609	0.243284	0.252479	0.289921	0.307744
117	0.000829186	0.0247305	0.0972079	0.087044	0.139128	0.209177	0.245709	0.256136	0.292978	0.311671
118	0.000829563	0.0250302	0.0981631	0.0881501	0.140665	0.211746	0.248124	0.259801	0.296037	0.315592
119	0.00082993	0.0253298	0.099118	0.0892585	0.142205	0.214316	0.250526	0.263474	0.299099	0.319506
120	0.000830288	0.0256294	0.100072	0.0903691	0.14375	0.216888	0.252916	0.267155	0.302164	0.323412
121	0.000830637	0.0259287	0.101026	0.0914819	0.145298	0.219461	0.255292	0.270843	0.305234	0.32731
122	0.000830978	0.0262279	0.10198	0.0925968	0.14685	0.222035	0.257655	0.274536	0.308307	0.3312
123	0.00083131	0.0265269	0.102933	0.0937136	0.148405	0.22461	0.260004	0.278236	0.311384	0.335081
124	0.000831634	0.0268256	0.103885	0.0948324	0.149962	0.227186	0.262341	0.28194	0.314464	0.338953
125	0.00083195	0.027124	0.104837	0.0959529	0.151522	0.229763	0.264668	0.285648	0.317549	0.342814
126	0.000832258	0.0274222	0.105787	0.0970751	0.153085	0.232341	0.266986	0.289361	0.320637	0.346666
127	0.000832559	0.02772	0.106737	0.098199	0.154649	0.23492	0.269302	0.293076	0.323728	0.350506
128	0.000832853	0.0280174	0.107687	0.0993244	0.156215	0.237499	0.27162	0.296794	0.326824	0.354336
129	0.000833139	0.0283144	0.108635	0.100451	0.157782	0.240079	0.273941	0.300513	0.329922	0.358154
130	0.000833418	0.028611	0.109583	0.101579	0.159349	0.24266	0.276265	0.304234	0.333024	0.361961
131	0.000833691	0.0289072	0.110529	0.102709	0.160918	0.24524	0.278591	0.307955	0.336129	0.365756
132	0.000833957	0.0292028	0.111475	0.10384	0.162487	0.247821	0.28092	0.311677	0.339238	0.369538
133	0.000834216	0.029498	0.11242	0.104972	0.164055	0.250401	0.283251	0.315398	0.34235	0.373308
134	0.00083447	0.0297926	0.113363	0.106105	0.165624	0.25298	0.285585	0.319117	0.345464	0.377065
135	0.000834717	0.0300866	0.114306	0.107239	0.167191	0.255559	0.287921	0.322835	0.348582	0.380808
136	0.000834958	0.0303801	0.115248	0.108374	0.168758	0.258137	0.290259	0.326551	0.351703	0.384539
137	0.000835194	0.030673	0.116188	0.109509	0.170324	0.260714	0.292599	0.330263	0.354827	0.388256
138	0.000835424	0.0309652	0.117127	0.110646	0.171888	0.263289	0.294941	0.333972	0.357953	0.391959
139	0.000835649	0.0312568	0.118065	0.111784	0.17345	0.265863	0.297285	0.337677	0.361082	0.395648
140	0.000835868	0.0315477	0.119001	0.112922	0.17501	0.268435	0.29963	0.341378	0.364214	0.399322
141	0.000836082	0.031838	0.119937	0.114061	0.176567	0.271004	0.301978	0.345072	0.367347	0.402983
142	0.000836291	0.0321275	0.120871	0.115201	0.178122	0.273571	0.304327	0.348761	0.370483	0.406628
143	0.000836495	0.0324163	0.121803	0.116341	0.179675	0.276136	0.306677	0.352444	0.37362	0.410259
144	0.000836695	0.0327044	0.122735	0.117482	0.181224	0.278697	0.309029	0.356119	0.376758	0.413874
145	0.000836889	0.0329917	0.123665	0.118623	0.182769	0.281255	0.311382	0.359787	0.379898	0.417474
146	0.000837079	0.0332783	0.124593	0.119765	0.184312	0.28381	0.313736	0.363447	0.383039	0.421059
147	0.000837265	0.033564	0.12552	0.120907	0.18585	0.286361	0.316091	0.367098	0.38618	0.424628
148	0.000837447	0.033849	0.126445	0.12205	0.187384	0.288908	0.318447	0.37074	0.389322	0.42818
149	0.000837624	0.0341331	0.127369	0.123194	0.188914	0.291451	0.320804	0.374371	0.392463	0.431717
150	0.000837797	0.0344165	0.128291	0.124337	0.19044	0.293989	0.323162	0.377993	0.395604	0.435238
151	0.000837966	0.034699	0.129211	0.125481	0.191961	0.296523	0.325521	0.381603	0.398745	0.438742
152	0.000838131	0.0349806	0.13013	0.126626	0.193478	0.299051	0.32788	0.385202	0.401884	0.44223
153	0.000838292	0.0352614	0.131047	0.127771	0.194989	0.301575	0.330239	0.388789	0.405021	0.445701
154	0.00083845	0.0355413	0.131962	0.128916	0.196496	0.304093	0.332599	0.392363	0.408156	0.449155
155	0.000838604	0.0358204	0.132875	0.130062	0.197997	0.306605	0.334958	0.395924	0.411289	0.452591
156	0.000838754	0.0360985	0.133787	0.131208	0.199493	0.309111	0.337318	0.399471	0.414418	0.456011
157	0.000838901	0.0363758	0.134697	0.132354	0.200984	0.311611	0.339678	0.403005	0.417545	0.459412
158	0.000839044	0.0366521	0.135605	0.133501	0.202469	0.314105	0.342038	0.406523	0.420667	0.462797
159	0.000839185	0.0369276	0.13651	0.134648	0.203948	0.316593	0.344397	0.410027	0.423784	0.466163
160	0.000839322	0.0372021	0.137414	0.135796	0.205422	0.319073	0.346756	0.413514	0.426897	0.469512
161	0.000839456	0.0374757	0.138316	0.136943	0.20689	0.321547	0.349115	0.416986	0.430004	0.472842
162	0.000839586	0.0377484	0.139216	0.138092	0.208352	0.324013	0.351473	0.42044	0.433105	0.476154
163	0.000839714	0.0380202	0.140114	0.13924	0.209809	0.326472	0.35383	0.423878	0.436199	0.479448
164	0.000839839	0.038291	0.141009	0.140389	0.211259	0.328924	0.356186	0.427298	0.439287	0.482723
165	0.000839961	0.0385609	0.141903	0.141539	0.212704	0.331368	0.358541	0.4307	0.442367	0.48598
166	0.00084008	0.0388298	0.142794	0.142689	0.214143	0.333803	0.360895	0.434083	0.445438	0.489218
167	0.000840197	0.0390978	0.143683	0.143839	0.215576	0.336231	0.363249	0.437447	0.448501	0.492437
168	0.000840311	0.0393649	0.14457	0.14499	0.217003	0.338651	0.3656	0.440792	0.451555	0.495638
169	0.000840422	0.039631	0.145455	0.146141	0.218424	0.341061	0.367951	0.444117	0.4546	0.498819
170	0.000840531	0.0398961	0.146337	0.147293	0.219839	0.343464	0.370299	0.447422	0.457634	0.501981
171	0.000840637	0.0401604	0.147217	0.148445	0.221249	0.345857	0.372646	0.450707	0.460658	0.505124
172	0.000840741	0.0404237	0.148094	0.149599	0.222653	0.348242	0.374992	0.45397	0.463671	0.508247
173	0.000840842	0.040686	0.148969	0.150752	0.22405	0.350617	0.377335	0.457213	0.466673	0.511352
174	0.000840941	0.0409474	0.149842	0.151906	0.225443	0.352983	0.379676	0.460433	0.469663	0.514437
175	0.000841038	0.0412079	0.150712	0.153061	0.226829	0.355339	0.382016	0.463632	0.47264	0.517502
176	0.000841133	0.0414674	0.151579	0.154217	0.22821	0.357686	0.384353	0.466809	0.475606	0.520548
177	0.000841225	0.041726	0.152444	0.155373	0.229586	0.360024	0.386687	0.469964	0.478559	0.523575
178	0.000841316	0.0419836	0.153307	0.15653	0.230956	0.362351	0.38902	0.473095	0.481499	0.526582
179	0.000841404	0.0422402	0.154167	0.157688	0.232321	0.364669	0.391349	0.476204	0.484425	0.52957
180	0.00084149	0.042496	0.155024	0.158847	0.233681	0.366976	0.393676	0.47929	0.487339	0.532538
181	0.000841574	0.0427508	0.155878	0.160006	0.235035	0.369273	0.396	0.482352	0.490239	0.535486
182	0.000841657	0.0430046	0.15673	0.161166	0.236385	0.371559	0.398322	0.485392	0.493125	0.538415
183	0.000841737	0.0432576	0.157579	0.162328	0.237729	0.373835	0.40064	0.488407	0.495998	0.541325
184	0.000841816	0.0435096	0.158425	0.16349	0.239069	0.376101	0.402955	0.491399	0.498858	0.544215
185	0.000841892	0.0437607	0.159269	0.164653	0.240404	0.378355	0.405267	0.494368	0.501704	0.547086
186	0.000841967	0.0440108	0.160109	0.165817	0.241734	0.380599	0.407575	0.497312	0.504537	0.549937
187	0.000842041	0.0442601	0.160947	0.166982	0.243059	0.382831	0.40988	0.500233	0.507358	0.55277
188	0.000842112	0.0445084	0.161782	0.168148	0.24438	0.385053	0.412182	0.50313	0.510165	0.555583
189	0.000842182	0.0447558	0.162614	0.169315	0.245697	0.387263	0.414479	0.506004	0.51296	0.558377
190	0.00084225	0.0450024	0.163443	0.170483	0.247009	0.389462	0.416773	0.508853	0.515743	0.561151
191	0.000842317	0.045248	0.16427	0.171652	0.248318	0.391649	0.419063	0.51168	0.518514	0.563907
192	0.000842382	0.0454928	0.165093	0.172822	0.249622	0.393825	0.421349	0.514483	0.521274	0.566644
193	0.000842446	0.0457367	0.165913	0.173993	0.250922	0.39599	0.423631	0.517263	0.524023	0.569362
194	0.000842508	0.0459797	0.166731	0.175166	0.252218	0.398142	0.425908	0.520019	0.526761	0.572062
195	0.000842569	0.0462218	0.167545	0.17634	0.253511	0.400283	0.428181	0.522753	0.529487	0.574742
196	0.000842628	0.046463	0.168356	0.177514	0.254799	0.402412	0.43045	0.525465	0.532202	0.577405
197	0.000842686	0.0467034	0.169164	0.17869	0.256085	0.404529	0.432714	0.528154	0.534904	0.580048
198	0.000842742	0.046943	0.169969	0.179867	0.257366	0.406633	0.434973	0.530821	0.537595	0.582674
199	0.000842797	0.0471817	0.170771	0.181046	0.258644	0.408726	0.437227	0.533467	0.540274	0.585282
200	0.000842851	0.0474196	0.17157	0.182225	0.259919	0.410807	0.439477	0.536091	0.542939	0.587871
201	0.000842904	0.0476566	0.172366	0.183406	0.26119	0.412875	0.441721	0.538694	0.545593	0.590442
202	0.000842955	0.0478928	0.173159	0.184588	0.262458	0.414931	0.44396	0.541277	0.548233	0.592996
203	0.000843005	0.0481282	0.173948	0.185771	0.263723	0.416975	0.446194	0.543839	0.550861	0.595532
204	0.000843054	0.0483628	0.174734	0.186956	0.264985	0.419006	0.448423	0.546382	0.553475	0.598051
205	0.000843101	0.0485966	0.175517	0.188141	0.266244	0.421025	0.450646	0.548906	0.556076	0.600552
206	0.000843148	0.0488296	0.176297	0.189328	0.2675	0.423032	0.452863	0.55141	0.558664	0.603036
207	0.000843193	0.0490618	0.177074	0.190516	0.268753	0.425026	0.455075	0.553896	0.561238	0.605503
208	0.000843237	0.0492932	0.177847	0.191706	0.270003	0.427008	0.457281	0.556364	0.563798	0.607952
209	0.00084328	0.0495239	0.178617	0.192896	0.27125	0.428977	0.459481	0.558814	0.566344	0.610385
210	0.000843322	0.0497538	0.179384	0.194088	0.272494	0.430935	0.461675	0.561245	0.568877	0.612802
211	0.000843363	0.0499829	0.180148	0.195281	0.273736	0.432879	0.463863	0.563659	0.571395	0.615201
212	0.000843403	0.0502113	0.180908	0.196475	0.274975	0.434811	0.466045	0.566056	0.573898	0.617584
213	0.000843442	0.0504389	0.181665	0.197671	0.276212	0.436732	0.46822	0.568436	0.576387	0.619951
214	0.00084348	0.0506658	0.182419	0.198867	0.277445	0.438639	0.470389	0.570798	0.578862	0.622302
215	0.000843517	0.050892	0.183169	0.200065	0.278677	0.440535	0.472551	0.573144	0.581322	0.624637
216	0.000843553	0.0511174	0.183916	0.201264	0.279905	0.442418	0.474707	0.575474	0.583767	0.626956
217	0.000843588	0.0513422	0.18466	0.202464	0.281132	0.44429	0.476856	0.577787	0.586197	0.629259
218	0.000843623	0.0515662	0.1854	0.203665	0.282355	0.446149	0.478998	0.580084	0.588611	0.631547
219	0.000843656	0.0517896	0.186137	0.204868	0.283576	0.447997	0.481133	0.582366	0.591011	0.633819
220	0.000843688	0.0520123	0.186871	0.206071	0.284795	0.449833	0.483261	0.584632	0.593395	0.636075
221	0.00084372	0.0522342	0.187601	0.207275	0.286012	0.451657	0.485382	0.586882	0.595764	0.638317
222	0.000843751	0.0524555	0.188328	0.208481	0.287226	0.45347	0.487496	0.589116	0.598118	0.640544
223	0.000843781	0.0526762	0.189051	0.209687	0.288437	0.455272	0.489602	0.591335	0.600456	0.642755
224	0.00084381	0.0528962	0.189771	0.210895	0.289647	0.457062	0.491701	0.593539	0.602778	0.644952
225	0.000843838	0.0531155	0.190488	0.212103	0.290854	0.458842	0.493793	0.595728	0.605085	0.647134
226	0.000843866	0.0533342	0.191201	0.213312	0.292058	0.460611	0.495877	0.597901	0.607376	0.649302
227	0.000843892	0.0535523	0.191911	0.214522	0.293261	0.462369	0.497953	0.60006	0.609651	0.651455
228	0.000843918	0.0537697	0.192617	0.215733	0.294461	0.464116	0.500022	0.602204	0.61191	0.653594
229	0.000843944	0.0539866	0.19332	0.216945	0.295659	0.465854	0.502083	0.604332	0.614154	0.655719
230	0.000843968	0.0542028	0.19402	0.218158	0.296854	0.467581	0.504136	0.606447	0.616381	0.65783
231	0.000843992	0.0544184	0.194716	0.219371	0.298047	0.469299	0.506181	0.608547	0.618592	0.659927
232	0.000844015	0.0546334	0.195409	0.220585	0.299238	0.471007	0.508218	0.610632	0.620788	0.662011
233	0.000844038	0.0548478	0.196098	0.2218	0.300427	0.472706	0.510247	0.612703	0.622967	0.66408
234	0.00084406	0.0550617	0.196784	0.223015	0.301613	0.474396	0.512267	0.61476	0.625131	0.666137
235	0.000844081	0.0552749	0.197466	0.224231	0.302798	0.476077	0.51428	0.616803	0.627278	0.668179
236	0.000844101	0.0554876	0.198145	0.225447	0.303979	0.47775	0.516284	0.618832	0.629409	0.670209
237	0.000844121	0.0556998	0.198821	0.226664	0.305159	0.479414	0.51828	0.620848	0.631525	0.672226
238	0.000844141	0.0559114	0.199492	0.227882	0.306336	0.48107	0.520267	0.622849	0.633625	0.674229
239	0.000844159	0.0561224	0.200161	0.2291	0.307511	0.482718	0.522246	0.624837	0.635708	0.67622
240	0.000844177	0.0563329	0.200826	0.230318	0.308684	0.484358	0.524217	0.626812	0.637776	0.678198
241	0.000844195	0.0565429	0.201488	0.231537	0.309855	0.485992	0.526179	0.628773	0.639829	0.680163
242	0.000844212	0.0567524	0.202146	0.232756	0.311023	0.487618	0.528132	0.630721	0.641866	0.682116
243	0.000844228	0.0569613	0.2028	0.233975	0.312189	0.489237	0.530077	0.632656	0.643887	0.684056
244	0.000844244	0.0571698	0.203452	0.235195	0.313353	0.490849	0.532013	0.634578	0.645893	0.685984
245	0.000844259	0.0573777	0.204099	0.236415	0.314514	0.492456	0.53394	0.636487	0.647884	0.6879
246	0.000844274	0.0575851	0.204744	0.237635	0.315673	0.494055	0.535859	0.638384	0.64986	0.689803
247	0.000844288	0.057792	0.205385	0.238855	0.31683	0.495649	0.537769	0.640267	0.651821	0.691695
248	0.000844302	0.0579985	0.206022	0.240075	0.317984	0.497237	0.53967	0.642138	0.653768	0.693575
249	0.000844315	0.0582045	0.206656	0.241295	0.319137	0.49882	0.541562	0.643997	0.6557	0.695442
250	0.000844328	0.05841	0.207286	0.242515	0.320286	0.500397	0.543446	0.645843	0.657619	0.697299
251	0.00084434	0.058615	0.207913	0.243736	0.321434	0.501968	0.545321	0.647677	0.659523	0.699143
252	0.000844352	0.0588196	0.208537	0.244956	0.322578	0.503534	0.547186	0.649499	0.661414	0.700976
253	0.000844363	0.0590237	0.209157	0.246175	0.323721	0.505096	0.549043	0.651308	0.663292	0.702798
254	0.000844374	0.0592274	0.209774	0.247395	0.324861	0.506652	0.550891	0.653106	0.665157	0.704608
255	0.000844384	0.0594307	0.210387	0.248615	0.325999	0.508203	0.552731	0.654892	0.66701	0.706407
256	0.000844394	0.0596335	0.210997	0.249834	0.327134	0.50975	0.554561	0.656666	0.668851	0.708194
257	0.000844403	0.0598359	0.211604	0.251053	0.328267	0.511292	0.556383	0.658429	0.670681	0.709971
258	0.000844412	0.0600379	0.212207	0.252271	0.329397	0.512829	0.558195	0.66018	0.672499	0.711736
259	0.000844421	0.0602394	0.212807	0.253489	0.330525	0.514361	0.559999	0.661919	0.674308	0.713491
260	0.000844429	0.0604405	0.213403	0.254707	0.33165	0.51589	0.561794	0.663647	0.676107	0.715234
261	0.000844437	0.0606413	0.213996	0.255924	0.332772	0.517413	0.56358	0.665363	0.677895	0.716967
262	0.000844444	0.0608416	0.214586	0.257141	0.333892	0.518932	0.565358	0.667069	0.679674	0.718689
263	0.000844451	0.0610415	0.215172	0.258357	0.335009	0.520447	0.567126	0.668763	0.681442	0.720401
264	0.000844458	0.0612411	0.215755	0.259572	0.336124	0.521958	0.568886	0.670446	0.683202	0.722102
265	0.000844464	0.0614402	0.216334	0.260787	0.337235	0.523464	0.570638	0.672118	0.684951	0.723792
266	0.00084447	0.061639	0.216911	0.262001	0.338344	0.524966	0.57238	0.673779	0.686691	0.725472
267	0.000844476	0.0618374	0.217484	0.263215	0.339451	0.526463	0.574114	0.67543	0.688422	0.727142
268	0.000844481	0.0620355	0.218053	0.264427	0.340554	0.527957	0.575839	0.677069	0.690143	0.728801
269	0.000844486	0.0622331	0.21862	0.265639	0.341655	0.529446	0.577556	0.678698	0.691855	0.73045
270	0.00084449	0.0624304	0.219183	0.26685	0.342752	0.530932	0.579264	0.680316	0.693558	0.732088
271	0.000844494	0.0626274	0.219743	0.268061	0.343847	0.532413	0.580964	0.681923	0.695253	0.733717
272	0.000844498	0.062824	0.2203	0.26927	0.344939	0.53389	0.582655	0.68352	0.696938	0.735336
273	0.000844502	0.0630203	0.220853	0.270478	0.346028	0.535363	0.584338	0.685106	0.698615	0.736944
274	0.000844505	0.0632162	0.221404	0.271686	0.347113	0.536832	0.586013	0.686682	0.700283	0.738543
275	0.000844508	0.0634117	0.221951	0.272892	0.348196	0.538298	0.587679	0.688248	0.701942	0.740132
276	0.00084451	0.063607	0.222495	0.274098	0.349275	0.539759	0.589337	0.689803	0.703593	0.741711
277	0.000844513	0.0638019	0.223036	0.275302	0.350352	0.541216	0.590987	0.691348	0.705236	0.74328
278	0.000844515	0.0639965	0.223574	0.276505	0.351425	0.54267	0.592629	0.692883	0.70687	0.744839
279	0.000844516	0.0641908	0.224109	0.277708	0.352495	0.544119	0.594263	0.694408	0.708497	0.746389
280	0.000844518	0.0643847	0.224641	0.278909	0.353562	0.545565	0.595889	0.695922	0.710115	0.747929
281	0.000844519	0.0645784	0.22517	0.280109	0.354625	0.547007	0.597506	0.697427	0.711725	0.74946
282	0.000844519	0.0647717	0.225696	0.281307	0.355685	0.548445	0.599116	0.698921	0.713327	0.750981
283	0.00084452	0.0649647	0.226219	0.282505	0.356742	0.54988	0.600718	0.700405	0.714921	0.752493
284	0.00084452	0.0651574	0.226739	0.283701	0.357795	0.55131	0.602313	0.70188	0.716508	0.753995
285	0.00084452	0.0653499	0.227256	0.284896	0.358845	0.552737	0.603899	0.703344	0.718087	0.755488
286	0.00084452	0.065542	0.22777	0.286089	0.359891	0.554161	0.605478	0.704799	0.719658	0.756972
287	0.000844519	0.0657339	0.228282	0.287281	0.360933	0.55558	0.60705	0.706243	0.721221	0.758447
288	0.000844519	0.0659254	0.22879	0.288472	0.361973	0.556996	0.608614	0.707678	0.722777	0.759912
289	0.000844518	0.0661167	0.229296	0.289662	0.363008	0.558408	0.61017	0.709103	0.724326	0.761368
290	0.000844517	0.0663077	0.229799	0.29085	0.36404	0.559817	0.611719	0.710519	0.725867	0.762816
291	0.000844515	0.0664984	0.230299	0.292036	0.365069	0.561222	0.613261	0.711924	0.727401	0.764254
292	0.000844513	0.0666889	0.230797	0.293222	0.366093	0.562623	0.614796	0.71332	0.728928	0.765683
293	0.000844511	0.0668791	0.231292	0.294405	0.367114	0.564021	0.616323	0.714706	0.730447	0.767104
294	0.000844509	0.067069	0.231784	0.295588	0.368132	0.565415	0.617843	0.716083	0.731959	0.768516
295	0.000844507	0.0672587	0.232274	0.296768	0.369146	0.566806	0.619356	0.71745	0.733465	0.769918
296	0.000844504	0.0674481	0.232761	0.297948	0.370156	0.568193	0.620862	0.718807	0.734963	0.771313
297	0.000844501	0.0676372	0.233245	0.299125	0.371162	0.569576	0.622362	0.720155	0.736454	0.772698
298	0.000844498	0.0678261	0.233727	0.300301	0.372165	0.570956	0.623854	0.721493	0.737937	0.774075
299	0.000844495	0.0680147	0.234207	0.301476	0.373163	0.572333	0.62534	0.722821	0.739415	0.775443
300	0.000844492	0.0682031	0.234684	0.302649	0.374159	0.573706	0.626818	0.724141	0.740885	0.776803
301	0.000844488	0.0683913	0.235159	0.30382	0.37515	0.575075	0.62829	0.72545	0.742348	0.778154
302	0.000844484	0.0685792	0.235632	0.30499	0.376138	0.576441	0.629756	0.72675	0.743804	0.779497
303	0.00084448	0.0687668	0.236102	0.306158	0.377123	0.577803	0.631214	0.728041	0.745254	0.780832
304	0.000844476	0.0689542	0.236569	0.307325	0.378103	0.579162	0.632667	0.729322	0.746697	0.782158
305	0.000844472	0.0691414	0.237035	0.30849	0.37908	0.580517	0.634112	0.730594	0.748133	0.783476
306	0.000844467	0.0693284	0.237498	0.309653	0.380054	0.581869	0.635552	0.731857	0.749562	0.784786
307	0.000844463	0.0695151	0.237959	0.310814	0.381024	0.583217	0.636985	0.73311	0.750985	0.786088
308	0.000844458	0.0697016	0.238418	0.311974	0.381991	0.584562	0.638411	0.734354	0.752401	0.787381
309	0.000844453	0.0698879	0.238875	0.313132	0.382955	0.585903	0.639832	0.735589	0.75381	0.788667
310	0.000844447	0.070074	0.23933	0.314289	0.383915	0.587241	0.641246	0.736814	0.755213	0.789944
311	0.000844442	0.0702598	0.239783	0.315443	0.384872	0.588575	0.642654	0.738031	0.756609	0.791214
312	0.000844436	0.0704454	0.240233	0.316596	0.385825	0.589906	0.644055	0.739238	0.757999	0.792475
313	0.000844431	0.0706308	0.240682	0.317747	0.386776	0.591233	0.645451	0.740436	0.759382	0.793729
314	0.000844425	0.070816	0.241129	0.318897	0.387724	0.592557	0.64684	0.741624	0.760759	0.794975
315	0.000844419	0.071001	0.241574	0.320045	0.388668	0.593877	0.648224	0.742804	0.762129	0.796214
316	0.000844412	0.0711858	0.242017	0.321191	0.38961	0.595193	0.649601	0.743975	0.763492	0.797444
317	0.000844406	0.0713704	0.242458	0.322335	0.39055	0.596506	0.650973	0.745137	0.764849	0.798667
318	0.0008444	0.0715547	0.242897	0.323477	0.391486	0.597816	0.652338	0.74629	0.766199	0.799883
319	0.000844393	0.0717389	0.243335	0.324618	0.39242	0.599122	0.653698	0.747433	0.767543	0.801091
320	0.000844386	0.0719229	0.243771	0.325757	0.393352	0.600425	0.655052	0.748569	0.768881	0.802291
321	0.000844379	0.0721066	0.244205	0.326894	0.394282	0.601724	0.6564	0.749695	0.770212	0.803484
322	0.000844372	0.0722902	0.244637	0.328029	0.395209	0.603019	0.657742	0.750812	0.771537	0.80467
323	0.000844365	0.0724736	0.245068	0.329163	0.396134	0.604311	0.659078	0.751921	0.772855	0.805848
324	0.000844358	0.0726567	0.245497	0.330295	0.397057	0.605599	0.660409	0.753022	0.774167	0.807019
325	0.00084435	0.0728397	0.245925	0.331424	0.397979	0.606884	0.661734	0.754114	0.775472	0.808183
326	0.000844343	0.0730225	0.246351	0.332553	0.398898	0.608165	0.663053	0.755197	0.776771	0.809339
327	0.000844335	0.0732052	0.246775	0.333679	0.399816	0.609443	0.664367	0.756272	0.778064	0.810489
328	0.000844327	0.0733876	0.247198	0.334804	0.400732	0.610716	0.665675	0.757339	0.77935	0.811631
329	0.000844319	0.0735698	0.24762	0.335926	0.401646	0.611987	0.666978	0.758397	0.78063	0.812766
330	0.000844311	0.0737519	0.24804	0.337047	0.402559	0.613254	0.668274	0.759447	0.781904	0.813895
331	0.000844303	0.0739338	0.248459	0.338166	0.40347	0.614517	0.669566	0.760489	0.783171	0.815016
332	0.000844295	0.0741155	0.248876	0.339284	0.40438	0.615776	0.670852	0.761524	0.784432	0.816131
333	0.000844286	0.074297	0.249292	0.340399	0.405288	0.617032	0.672132	0.76255	0.785686	0.817238
334	0.000844278	0.0744784	0.249707	0.341513	0.406194	0.618284	0.673407	0.763569	0.786934	0.818339
335	0.000844269	0.0746595	0.25012	0.342625	0.407098	0.619533	0.674676	0.76458	0.788176	0.819433
336	0.00084426	0.0748405	0.250532	0.343735	0.408001	0.620778	0.67594	0.765583	0.789411	0.820521
337	0.000844252	0.0750214	0.250943	0.344844	0.408902	0.622019	0.677199	0.766579	0.79064	0.821602
338	0.000844243	0.075202	0.251353	0.34595	0.409802	0.623257	0.678452	0.767568	0.791863	0.822676
339	0.000844234	0.0753825	0.251761	0.347055	0.4107	0.624491	0.6797	0.76855	0.793079	0.823744
340	0.000844225	0.0755629	0.252168	0.348158	0.411596	0.625721	0.680942	0.769524	0.794289	0.824805
341	0.000844215	0.075743	0.252574	0.349259	0.412491	0.626948	0.68218	0.770492	0.795492	0.82586
342	0.000844206	0.075923	0.252979	0.350359	0.413384	0.62817	0.683411	0.771453	0.796689	0.826908
343	0.000844197	0.0761028	0.253383	0.351456	0.414275	0.62939	0.684638	0.772407	0.79788	0.82795
344	0.000844187	0.0762825	0.253786	0.352552	0.415165	0.630605	0.68586	0.773355	0.799065	0.828985
345	0.000844178	0.076462	0.254188	0.353646	0.416053	0.631817	0.687076	0.774296	0.800243	0.830015
346	0.000844168	0.0766414	0.254589	0.354739	0.41694	0.633025	0.688287	0.775231	0.801414	0.831038
347	0.000844158	0.0768206	0.254989	0.355829	0.417825	0.634229	0.689493	0.77616	0.80258	0.832055
348	0.000844148	0.0769996	0.255388	0.356918	0.418708	0.635429	0.690694	0.777083	0.803739	0.833066
349	0.000844138	0.0771785	0.255785	0.358005	0.41959	0.636626	0.691889	0.778	0.804891	0.83407
350	0.000844128	0.0773573	0.256182	0.35909	0.420471	0.637819	0.69308	0.778912	0.806038	0.835069
351	0.000844118	0.0775358	0.256578	0.360174	0.421349	0.639008	0.694266	0.779818	0.807178	0.836062
352	0.000844108	0.0777143	0.256973	0.361256	0.422226	0.640193	0.695446	0.780718	0.808311	0.837048
353	0.000844098	0.0778925	0.257368	0.362336	0.423102	0.641375	0.696621	0.781612	0.809438	0.838029
354	0.000844087	0.0780707	0.257761	0.363414	0.423976	0.642553	0.697792	0.782501	0.810559	0.839004
355	0.000844077	0.0782486	0.258153	0.364491	0.424848	0.643727	0.698957	0.783385	0.811673	0.839973
356	0.000844067	0.0784265	0.258545	0.365566	0.425719	0.644897	0.700118	0.784263	0.812781	0.840936
357	0.000844056	0.0786042	0.258936	0.366639	0.426588	0.646064	0.701274	0.785136	0.813883	0.841894
358	0.000844045	0.0787817	0.259326	0.367711	0.427456	0.647226	0.702424	0.786003	0.814978	0.842845
359	0.000844035	0.0789591	0.259715	0.36878	0.428322	0.648385	0.70357	0.786865	0.816067	0.843791
360	0.000844024	0.0791364	0.260103	0.369849	0.429187	0.64954	0.704711	0.787722	0.817149	0.844732
361	0.000844013	0.0793135	0.260491	0.370915	0.43005	0.650692	0.705847	0.788573	0.818225	0.845667
362	0.000844002	0.0794904	0.260878	0.37198	0.430912	0.651839	0.706979	0.78942	0.819294	0.846596
363	0.000843991	0.0796673	0.261264	0.373043	0.431772	0.652983	0.708105	0.790262	0.820357	0.84752
364	0.00084398	0.079844	0.26165	0.374104	0.432631	0.654123	0.709227	0.791098	0.821413	0.848438
365	0.000843969	0.0800205	0.262035	0.375164	0.433488	0.655259	0.710344	0.79193	0.822463	0.849351
366	0.000843958	0.0801969	0.262419	0.376222	0.434343	0.656391	0.711456	0.792756	0.823507	0.850258
367	0.000843947	0.0803732	0.262802	0.377278	0.435197	0.65752	0.712564	0.793578	0.824544	0.85116
368	0.000843936	0.0805493	0.263185	0.378333	0.43605	0.658644	0.713667	0.794395	0.825574	0.852057
369	0.000843925	0.0807254	0.263567	0.379386	0.436901	0.659765	0.714765	0.795208	0.826598	0.852948
370	0.000843913	0.0809012	0.263949	0.380437	0.437751	0.660882	0.715858	0.796015	0.827616	0.853834
371	0.000843902	0.081077	0.26433	0.381487	0.438599	0.661995	0.716947	0.796819	0.828627	0.854715
372	0.00084389	0.0812526	0.26471	0.382535	0.439446	0.663105	0.718032	0.797617	0.829631	0.855591
373	0.000843879	0.0814281	0.26509	0.383581	0.440292	0.66421	0.719112	0.798412	0.830629	0.856461
374	0.000843867	0.0816034	0.265469	0.384626	0.441136	0.665312	0.720187	0.799202	0.83162	0.857327
375	0.000843856	0.0817786	0.265847	0.385669	0.441978	0.666411	0.721258	0.799987	0.832604	0.858187
376	0.000843844	0.0819537	0.266225	0.38671	0.442819	0.667505	0.722324	0.800769	0.833582	0.859042
377	0.000843832	0.0821287	0.266603	0.38775	0.443659	0.668595	0.723386	0.801546	0.834554	0.859893
378	0.000843821	0.0823035	0.26698	0.388788	0.444497	0.669682	0.724443	0.80232	0.835518	0.860738
379	0.000843809	0.0824783	0.267356	0.389824	0.445334	0.670765	0.725496	0.80309	0.836476	0.861578
380	0.000843797	0.0826528	0.267732	0.390859	0.44617	0.671845	0.726545	0.803856	0.837427	0.862414
381	0.000843785	0.0828273	0.268107	0.391892	0.447004	0.67292	0.727589	0.804618	0.838372	0.863244
382	0.000843773	0.0830017	0.268482	0.392923	0.447837	0.673992	0.728629	0.805377	0.83931	0.86407
383	0.000843761	0.0831759	0.268856	0.393953	0.448668	0.67506	0.729664	0.806133	0.840241	0.864891
384	0.000843749	0.08335	0.26923	0.394981	0.449498	0.676125	0.730695	0.806885	0.841165	0.865707
385	0.000843737	0.083524	0.269603	0.396007	0.450326	0.677186	0.731722	0.807634	0.842082	0.866518
386	0.000843725	0.0836978	0.269976	0.397032	0.451154	0.678243	0.732744	0.808379	0.842993	0.867325
387	0.000843713	0.0838716	0.270349	0.398055	0.45198	0.679296	0.733762	0.809122	0.843897	0.868127
388	0.000843701	0.0840452	0.270721	0.399076	0.452804	0.680346	0.734776	0.809861	0.844793	0.868924
389	0.000843689	0.0842187	0.271092	0.400096	0.453627	0.681392	0.735786	0.810597	0.845683	0.869716
390	0.000843677	0.0843921	0.271463	0.401113	0.454449	0.682434	0.736792	0.811329	0.846566	0.870504
391	0.000843664	0.0845653	0.271834	0.40213	0.45527	0.683473	0.737793	0.812058	0.847442	0.871287
392	0.000843652	0.0847385	0.272204	0.403144	0.456089	0.684508	0.73879	0.812785	0.848312	0.872066
393	0.00084364	0.0849115	0.272574	0.404156	0.456907	0.68554	0.739783	0.813508	0.849174	0.87284
394	0.000843627	0.0850844	0.272943	0.405167	0.457724	0.686568	0.740772	0.814228	0.850028	0.87361
395	0.000843615	0.0852573	0.273312	0.406176	0.458539	0.687593	0.741757	0.814944	0.850876	0.874375
396	0.000843603	0.08543	0.273681	0.407184	0.459353	0.688614	0.742738	0.815658	0.851717	0.875136
397	0.00084359	0.0856025	0.274049	0.408189	0.460166	0.689631	0.743714	0.816369	0.852551	0.875892
398	0.000843578	0.085775	0.274417	0.409193	0.460977	0.690645	0.744687	0.817076	0.853377	0.876644
399	0.000843565	0.0859474	0.274784	0.410195	0.461788	0.691656	0.745655	0.81778	0.854196	0.877392
400	0.000843553	0.0861196	0.275151	0.411195	0.462597	0.692663	0.74662	0.818482	0.855008	0.878135
401	0.00084354	0.0862918	0.275518	0.412193	0.463404	0.693666	0.74758	0.81918	0.855812	0.878874
402	0.000843528	0.0864638	0.275884	0.41319	0.464211	0.694666	0.748537	0.819876	0.856609	0.879609
403	0.000843515	0.0866358	0.27625	0.414184	0.465016	0.695663	0.749489	0.820568	0.857398	0.880339
404	0.000843502	0.0868076	0.276616	0.415177	0.46582	0.696656	0.750438	0.821258	0.85818	0.881065
405	0.00084349	0.0869793	0.276981	0.416168	0.466623	0.697646	0.751383	0.821944	0.858955	0.881787
406	0.000843477	0.0871509	0.277346	0.417157	0.467424	0.698632	0.752324	0.822628	0.859721	0.882505
407	0.000843464	0.0873224	0.277711	0.418144	0.468224	0.699615	0.753261	0.823308	0.860479	0.883218
408	0.000843452	0.0874938	0.278075	0.41913	0.469023	0.700595	0.754194	0.823986	0.861231	0.883927
409	0.000843439	0.0876651	0.27844	0.420113	0.469821	0.701572	0.755123	0.824661	0.861978	0.884632
410	0.000843426	0.0878363	0.278803	0.421094	0.470618	0.702545	0.756048	0.825333	0.862721	0.885334
411	0.000843413	0.0880074	0.279167	0.422074	0.471413	0.703515	0.75697	0.826002	0.863459	0.88603
412	0.000843401	0.0881784	0.27953	0.423052	0.472207	0.704481	0.757888	0.826669	0.864192	0.886723
413	0.000843388	0.0883493	0.279893	0.424027	0.473	0.705445	0.758802	0.827332	0.864921	0.887412
414	0.000843375	0.0885201	0.280255	0.425001	0.473792	0.706405	0.759712	0.827993	0.865646	0.888097
415	0.000843362	0.0886907	0.280618	0.425973	0.474583	0.707362	0.760618	0.82865	0.866366	0.888778
416	0.000843349	0.0888613	0.28098	0.426943	0.475372	0.708315	0.761521	0.829305	0.867082	0.889455
417	0.000843336	0.0890318	0.281342	0.427911	0.47616	0.709266	0.76242	0.829958	0.867793	0.890127
418	0.000843323	0.0892022	0.281703	0.428877	0.476947	0.710214	0.763315	0.830607	0.868501	0.890796
419	0.000843311	0.0893725	0.282064	0.429841	0.477733	0.711158	0.764207	0.831254	0.869203	0.891461
420	0.000843298	0.0895427	0.282425	0.430803	0.478518	0.712099	0.765095	0.831898	0.869902	0.892122
421	0.000843285	0.0897128	0.282786	0.431763	0.479301	0.713037	0.765979	0.832539	0.870597	0.89278
422	0.000843272	0.0898828	0.283147	0.432721	0.480084	0.713972	0.76686	0.833177	0.871287	0.893433
423	0.000843259	0.0900527	0.283507	0.433677	0.480865	0.714904	0.767737	0.833813	0.871973	0.894082
424	0.000843246	0.0902225	0.283867	0.434631	0.481645	0.715833	0.768611	0.834446	0.872655	0.894728
425	0.000843233	0.0903923	0.284227	0.435583	0.482424	0.716759	0.76948	0.835076	0.873334	0.89537
426	0.00084322	0.0905619	0.284586	0.436533	0.483202	0.717682	0.770347	0.835704	0.874008	0.896008
427	0.000843207	0.0907314	0.284946	0.437481	0.483979	0.718603	0.771209	0.836329	0.874678	0.896642
428	0.000843194	0.0909009	0.285305	0.438427	0.484754	0.71952	0.772069	0.836951	0.875344	0.897273
429	0.000843181	0.0910702	0.285664	0.439371	0.485528	0.720434	0.772924	0.837571	0.876006	0.897899
430	0.000843168	0.0912395	0.286023	0.440313	0.486302	0.721345	0.773777	0.838188	0.876665	0.898522
431	0.000843154	0.0914086	0.286381	0.441253	0.487074	0.722253	0.774625	0.838802	0.877319	0.899142
432	0.000843141	0.0915777	0.286739	0.442191	0.487845	0.723159	0.77547	0.839414	0.87797	0.899757
433	0.000843128	0.0917467	0.287098	0.443127	0.488614	0.724061	0.776312	0.840023	0.878617	0.900369
434	0.000843115	0.0919156	0.287455	0.444061	0.489383	0.724961	0.77715	0.84063	0.879261	0.900978
435	0.000843102	0.0920844	0.287813	0.444992	0.490151	0.725858	0.777985	0.841234	0.8799	0.901582
436	0.000843089	0.0922532	0.288171	0.445922	0.490917	0.726752	0.778817	0.841835	0.880536	0.902183
437	0.000843076	0.0924218	0.288528	0.44685	0.491682	0.727644	0.779645	0.842434	0.881169	0.902781
438	0.000843063	0.0925904	0.288885	0.447776	0.492446	0.728532	0.78047	0.84303	0.881798	0.903375
439	0.00084305	0.0927588	0.289242	0.4487	0.493209	0.729418	0.781291	0.843623	0.882423	0.903965
440	0.000843037	0.0929272	0.289599	0.449622	0.493971	0.730301	0.782109	0.844215	0.883045	0.904552
441	0.000843023	0.0930955	0.289956	0.450542	0.494732	0.731181	0.782924	0.844803	0.883663	0.905135
442	0.00084301	0.0932637	0.290312	0.45146	0.495492	0.732059	0.783735	0.845389	0.884278	0.905714
443	0.000842997	0.0934318	0.290669	0.452376	0.49625	0.732934	0.784543	0.845973	0.884889	0.90629
444	0.000842984	0.0935999	0.291025	0.45329	0.497008	0.733806	0.785348	0.846554	0.885497	0.906863
445	0.000842971	0.0937678	0.291381	0.454202	0.497764	0.734675	0.786149	0.847133	0.886102	0.907432
446	0.000842958	0.0939357	0.291737	0.455112	0.498519	0.735542	0.786948	0.847709	0.886703	0.907998
447	0.000842944	0.0941035	0.292093	0.45602	0.499273	0.736406	0.787743	0.848282	0.887301	0.90856
448	0.000842931	0.0942712	0.292448	0.456926	0.500026	0.737268	0.788535	0.848854	0.887896	0.909118
449	0.000842918	0.0944389	0.292804	0.45783	0.500778	0.738127	0.789323	0.849422	0.888487	0.909674
450	0.000842905	0.0946064	0.293159	0.458733	0.501529	0.738983	0.790109	0.849989	0.889075	0.910226
451	0.000842892	0.0947739	0.293514	0.459633	0.502278	0.739837	0.790891	0.850553	0.88966	0.910774
452	0.000842879	0.0949413	0.293869	0.460531	0.503027	0.740688	0.79167	0.851114	0.890242	0.911319
453	0.000842865	0.0951086	0.294224	0.461428	0.503774	0.741537	0.792446	0.851673	0.890821	0.911861
454	0.000842852	0.0952759	0.294579	0.462323	0.50452	0.742383	0.793219	0.85223	0.891397	0.912399
455	0.000842839	0.095443	0.294934	0.463215	0.505265	0.743227	0.793989	0.852785	0.891969	0.912934
456	0.000842826	0.0956101	0.295288	0.464106	0.506009	0.744068	0.794756	0.853337	0.892539	0.913466
457	0.000842813	0.0957771	0.295643	0.464995	0.506752	0.744906	0.79552	0.853887	0.893105	0.913994
458	0.0008428	0.095944	0.295997	0.465883	0.507494	0.745742	0.79628	0.854434	0.893669	0.914519
459	0.000842786	0.0961109	0.296351	0.466768	0.508234	0.746576	0.797038	0.854979	0.89423	0.91504
460	0.000842773	0.0962777	0.296705	0.467652	0.508974	0.747407	0.797793	0.855522	0.894787	0.915559
461	0.00084276	0.0964444	0.297059	0.468533	0.509712	0.748236	0.798544	0.856062	0.895342	0.916074
462	0.000842747	0.096611	0.297413	0.469413	0.510449	0.749062	0.799293	0.856601	0.895894	0.916586
463	0.000842734	0.0967776	0.297767	0.470291	0.511185	0.749886	0.800039	0.857137	0.896443	0.917094
464	0.000842721	0.0969441	0.298121	0.471168	0.51192	0.750707	0.800782	0.857671	0.896989	0.917599
465	0.000842707	0.0971105	0.298474	0.472043	0.512654	0.751526	0.801522	0.858202	0.897532	0.918101
466	0.000842694	0.0972768	0.298828	0.472915	0.513386	0.752343	0.802259	0.858731	0.898073	0.9186
467	0.000842681	0.0974431	0.299181	0.473787	0.514118	0.753157	0.802993	0.859259	0.89861	0.919096
468	0.000842668	0.0976093	0.299534	0.474656	0.514848	0.753968	0.803724	0.859783	0.899145	0.919588
469	0.000842655	0.0977754	0.299888	0.475524	0.515577	0.754778	0.804452	0.860306	0.899678	0.920078
470	0.000842642	0.0979415	0.300241	0.47639	0.516305	0.755585	0.805178	0.860827	0.900207	0.920564
471	0.000842629	0.0981074	0.300594	0.477255	0.517032	0.75639	0.805901	0.861345	0.900734	0.921047
472	0.000842615	0.0982734	0.300947	0.478117	0.517757	0.757192	0.80662	0.861861	0.901258	0.921527
473	0.000842602	0.0984392	0.3013	0.478979	0.518481	0.757992	0.807338	0.862376	0.90178	0.922003
474	0.000842589	0.098605	0.301653	0.479838	0.519205	0.75879	0.808052	0.862888	0.902299	0.922477
475	0.000842576	0.0987707	0.302005	0.480696	0.519927	0.759585	0.808763	0.863398	0.902815	0.922947
476	0.000842563	0.0989363	0.302358	0.481552	0.520647	0.760378	0.809472	0.863906	0.903329	0.923415
477	0.00084255	0.0991019	0.302711	0.482407	0.521367	0.761169	0.810178	0.864411	0.90384	0.923879
478	0.000842537	0.0992674	0.303063	0.48326	0.522086	0.761958	0.810882	0.864915	0.904348	0.92434
479	0.000842524	0.0994328	0.303416	0.484112	0.522803	0.762744	0.811582	0.865417	0.904855	0.924798
480	0.00084251	0.0995982	0.303768	0.484962	0.523519	0.763528	0.812281	0.865917	0.905358	0.925253
481	0.000842497	0.0997635	0.30412	0.48581	0.524234	0.76431	0.812976	0.866414	0.905859	0.925706
482	0.000842484	0.0999288	0.304473	0.486658	0.524947	0.765089	0.813669	0.86691	0.906358	0.926155
483	0.000842471	0.100094	0.304825	0.487503	0.52566	0.765867	0.814359	0.867403	0.906854	0.926601
484	0.000842458	0.100259	0.305177	0.488347	0.526371	0.766642	0.815046	0.867895	0.907348	0.927044
485	0.000842445	0.100424	0.305529	0.48919	0.527081	0.767415	0.815731	0.868385	0.907839	0.927484
486	0.000842432	0.100589	0.305882	0.490031	0.527789	0.768186	0.816413	0.868873	0.908328	0.927921
487	0.000842419	0.100754	0.306234	0.49087	0.528497	0.768954	0.817093	0.869358	0.908814	0.928355
488	0.000842406	0.100919	0.306586	0.491709	0.529203	0.769721	0.81777	0.869842	0.909298	0.928787
489	0.000842393	0.101084	0.306938	0.492545	0.529908	0.770485	0.818445	0.870324	0.90978	0.929215
490	0.00084238	0.101248	0.30729	0.493381	0.530611	0.771247	0.819117	0.870804	0.91026	0.92964
491	0.000842367	0.101413	0.307641	0.494214	0.531314	0.772007	0.819786	0.871283	0.910737	0.930063
492	0.000842354	0.101578	0.307993	0.495047	0.532015	0.772765	0.820453	0.871759	0.911212	0.930483
493	0.000842341	0.101742	0.308345	0.495878	0.532715	0.77352	0.821118	0.872233	0.911684	0.9309
494	0.000842328	0.101907	0.308697	0.496707	0.533413	0.774274	0.82178	0.872706	0.912154	0.931314
495	0.000842315	0.102071	0.309049	0.497536	0.534111	0.775025	0.82244	0.873177	0.912622	0.931725
496	0.000842302	0.102236	0.3094	0.498362	0.534807	0.775775	0.823097	0.873646	0.913088	0.932133
497	0.000842289	0.1024	0.309752	0.499188	0.535501	0.776522	0.823752	0.874113	0.913551	0.932539
498	0.000842276	0.102564	0.310104	0.500012	0.536195	0.777267	0.824404	0.874578	0.914013	0.932942
499	0.000842263	0.102728	0.310455	0.500834	0.536887	0.77801	0.825054	0.875041	0.914472	0.933342
500	0.00084225	0.102892	0.310807	0.501655	0.537577	0.778751	0.825702	0.875503	0.914929	0.933739
501	0.000842237	0.103056	0.311159	0.502475	0.538267	0.77949	0.826347	0.875963	0.915383	0.934134
502	0.000842224	0.103221	0.31151	0.503294	0.538955	0.780227	0.82699	0.876421	0.915836	0.934526
503	0.000842211	0.103384	0.311862	0.50411	0.539642	0.780962	0.82763	0.876877	0.916286	0.934915
504	0.000842198	0.103548	0.312213	0.504926	0.540327	0.781695	0.828268	0.877332	0.916734	0.935302
505	0.000842186	0.103712	0.312565	0.50574	0.541011	0.782426	0.828904	0.877785	0.917181	0.935686
506	0.000842173	0.103876	0.312916	0.506553	0.541694	0.783154	0.829538	0.878236	0.917625	0.936068
507	0.00084216	0.10404	0.313268	0.507364	0.542375	0.783881	0.830169	0.878686	0.918066	0.936447
508	0.000842147	0.104203	0.31362	0.508174	0.543055	0.784606	0.830798	0.879133	0.918506	0.936823
509	0.000842134	0.104367	0.313971	0.508982	0.543734	0.785329	0.831424	0.879579	0.918944	0.937197
510	0.000842121	0.104531	0.314323	0.509789	0.544411	0.786049	0.832049	0.880024	0.91938	0.937568
511	0.000842108	0.104694	0.314674	0.510595	0.545087	0.786768	0.832671	0.880466	0.919813	0.937937
512	0.000842096	0.104858	0.315026	0.511399	0.545762	0.787485	0.833291	0.880907	0.920245	0.938303
513	0.000842083	0.105021	0.315377	0.512202	0.546435	0.788199	0.833908	0.881346	0.920675	0.938667
514	0.00084207	0.105184	0.315729	0.513003	0.547107	0.788912	0.834524	0.881784	0.921102	0.939029
515	0.000842057	0.105348	0.31608	0.513803	0.547777	0.789623	0.835137	0.88222	0.921528	0.939388
516	0.000842045	0.105511	0.316431	0.514601	0.548446	0.790332	0.835748	0.882654	0.921951	0.939745
517	0.000842032	0.105674	0.316783	0.515398	0.549113	0.791038	0.836357	0.883087	0.922373	0.9401
518	0.000842019	0.105837	0.317134	0.516194	0.54978	0.791743	0.836964	0.883518	0.922793	0.940452
519	0.000842006	0.106	0.317486	0.516988	0.550444	0.792446	0.837568	0.883947	0.92321	0.940803
520	0.000841994	0.106163	0.317837	0.517781	0.551108	0.793147	0.838171	0.884375	0.923626	0.941151
521	0.000841981	0.106326	0.318189	0.518572	0.551769	0.793846	0.838771	0.884801	0.92404	0.941497
522	0.000841968	0.106489	0.318541	0.519362	0.55243	0.794543	0.839369	0.885226	0.924452	0.941841
523	0.000841956	0.106652	0.318892	0.52015	0.553089	0.795238	0.839965	0.885649	0.924862	0.942183
524	0.000841943	0.106815	0.319244	0.520937	0.553746	0.795931	0.840559	0.88607	0.92527	0.942523
525	0.00084193	0.106978	0.319595	0.521723	0.554402	0.796622	0.841151	0.88649	0.925676	0.942861
526	0.000841918	0.107141	0.319947	0.522507	0.555057	0.797312	0.841741	0.886908	0.926081	0.943198
527	0.000841905	0.107303	0.320298	0.52329	0.55571	0.797999	0.842329	0.887324	0.926483	0.943532
528	0.000841892	0.107466	0.32065	0.524071	0.556362	0.798684	0.842914	0.887739	0.926884	0.943865
529	0.00084188	0.107628	0.321002	0.524851	0.557012	0.799368	0.843498	0.888153	0.927282	0.944196
530	0.000841867	0.107791	0.321353	0.525629	0.557661	0.800049	0.844079	0.888564	0.927679	0.944525
531	0.000841855	0.107954	0.321705	0.526406	0.558309	0.800729	0.844659	0.888975	0.928075	0.944853
532	0.000841842	0.108116	0.322057	0.527182	0.558955	0.801407	0.845236	0.889383	0.928468	0.945178
533	0.00084183	0.108278	0.322408	0.527956	0.559599	0.802082	0.845812	0.88979	0.928859	0.945502
534	0.000841817	0.108441	0.32276	0.528728	0.560242	0.802756	0.846385	0.890196	0.929249	0.945825
535	0.000841805	0.108603	0.323112	0.529499	0.560884	0.803428	0.846957	0.8906	0.929637	0.946145
536	0.000841792	0.108765	0.323464	0.530269	0.561524	0.804098	0.847526	0.891002	0.930023	0.946464
537	0.00084178	0.108927	0.323816	0.531037	0.562162	0.804766	0.848094	0.891403	0.930408	0.946781
538	0.000841767	0.10909	0.324167	0.531804	0.5628	0.805433	0.848659	0.891802	0.93079	0.947096
539	0.000841755	0.109252	0.324519	0.53257	0.563435	0.806097	0.849223	0.8922	0.931171	0.94741
540	0.000841742	0.109414	0.324871	0.533334	0.56407	0.806759	0.849784	0.892596	0.931551	0.947722
541	0.00084173	0.109576	0.325223	0.534096	0.564702	0.80742	0.850344	0.892991	0.931928	0.948032
542	0.000841717	0.109738	0.325575	0.534857	0.565334	0.808079	0.850902	0.893384	0.932304	0.94834
543	0.000841705	0.1099	0.325927	0.535617	0.565964	0.808735	0.851458	0.893776	0.932678	0.948647
544	0.000841693	0.110062	0.326279	0.536375	0.566592	0.80939	0.852011	0.894166	0.93305	0.948952
545	0.00084168	0.110223	0.326631	0.537132	0.567219	0.810043	0.852563	0.894554	0.933421	0.949256
546	0.000841668	0.110385	0.326984	0.537887	0.567845	0.810695	0.853113	0.894941	0.93379	0.949558
547	0.000841655	0.110547	0.327336	0.538641	0.568469	0.811344	0.853662	0.895327	0.934157	0.949858
548	0.000841643	0.110709	0.327688	0.539393	0.569091	0.811991	0.854208	0.895711	0.934523	0.950157
549	0.000841631	0.11087	0.32804	0.540144	0.569713	0.812637	0.854752	0.896093	0.934887	0.950454
550	0.000841619	0.111032	0.328392	0.540894	0.570333	0.813281	0.855295	0.896474	0.935249	0.95075
551	0.000841606	0.111194	0.328745	0.541642	0.570951	0.813923	0.855836	0.896853	0.93561	0.951044
552	0.000841594	0.111355	0.329097	0.542389	0.571568	0.814563	0.856374	0.897231	0.935969	0.951336
553	0.000841582	0.111517	0.329449	0.543134	0.572184	0.815201	0.856911	0.897608	0.936327	0.951627
554	0.000841569	0.111678	0.329802	0.543877	0.572798	0.815837	0.857447	0.897982	0.936682	0.951916
555	0.000841557	0.111839	0.330154	0.54462	0.573411	0.816472	0.85798	0.898356	0.937037	0.952203
556	0.000841545	0.112001	0.330507	0.54536	0.574022	0.817104	0.858511	0.898728	0.937389	0.95249
557	0.000841533	0.112162	0.33086	0.5461	0.574633	0.817735	0.859041	0.899098	0.937741	0.952774
558	0.000841521	0.112323	0.331212	0.546838	0.575241	0.818364	0.859569	0.899467	0.93809	0.953057
559	0.000841508	0.112485	0.331565	0.547574	0.575849	0.818991	0.860095	0.899834	0.938438	0.953339
560	0.000841496	0.112646	0.331918	0.548309	0.576455	0.819617	0.860619	0.9002	0.938784	0.953619
561	0.000841484	0.112807	0.33227	0.549043	0.57706	0.82024	0.861142	0.900564	0.939129	0.953897
562	0.000841472	0.112968	0.332623	0.549775	0.577664	0.820862	0.861662	0.900927	0.939473	0.954174
563	0.00084146	0.113129	0.332976	0.550506	0.578266	0.821482	0.862181	0.901288	0.939814	0.954449
564	0.000841448	0.11329	0.333329	0.551235	0.578867	0.8221	0.862698	0.901648	0.940155	0.954723
565	0.000841436	0.113451	0.333682	0.551962	0.579467	0.822716	0.863214	0.902007	0.940493	0.954996
566	0.000841424	0.113612	0.334035	0.552689	0.580066	0.823331	0.863728	0.902364	0.940831	0.955267
567	0.000841412	0.113773	0.334388	0.553414	0.580664	0.823943	0.864239	0.902719	0.941166	0.955536
568	0.0008414	0.113934	0.334741	0.554137	0.58126	0.824554	0.86475	0.903073	0.9415	0.955805
569	0.000841388	0.114095	0.335095	0.554859	0.581855	0.825163	0.865258	0.903425	0.941833	0.956071
570	0.000841376	0.114255	0.335448	0.555579	0.582449	0.825771	0.865765	0.903776	0.942164	0.956336
571	0.000841364	0.114416	0.335801	0.556298	0.583042	0.826376	0.86627	0.904126	0.942494	0.9566
572	0.000841352	0.114577	0.336155	0.557016	0.583635	0.82698	0.866773	0.904474	0.942822	0.956863
573	0.00084134	0.114737	0.336508	0.557732	0.584226	0.827582	0.867274	0.90482	0.943149	0.957124
574	0.000841328	0.114898	0.336861	0.558447	0.584816	0.828182	0.867774	0.905165	0.943474	0.957383
575	0.000841316	0.115059	0.337215	0.55916	0.585405	0.82878	0.868272	0.905509	0.943798	0.957641
576	0.000841304	0.115219	0.337569	0.559872	0.585993	0.829377	0.868769	0.905851	0.944121	0.957898
577	0.000841292	0.11538	0.337922	0.560582	0.586581	0.829971	0.869264	0.906192	0.944442	0.958153
578	0.00084128	0.11554	0.338276	0.561291	0.587167	0.830564	0.869757	0.906531	0.944761	0.958407
579	0.000841269	0.1157	0.33863	0.561999	0.587753	0.831156	0.870248	0.906869	0.945079	0.95866
580	0.000841257	0.115861	0.338984	0.562705	0.588338	0.831745	0.870738	0.907205	0.945396	0.958911
581	0.000841245	0.116021	0.339337	0.563409	0.588923	0.832333	0.871226	0.90754	0.945711	0.959161
582	0.000841233	0.116182	0.339691	0.564112	0.589507	0.832919	0.871713	0.907873	0.946025	0.959409
583	0.000841221	0.116342	0.340045	0.564814	0.59009	0.833503	0.872197	0.908205	0.946338	0.959657
584	0.00084121	0.116502	0.340399	0.565514	0.590673	0.834085	0.872681	0.908536	0.946649	0.959902
585	0.000841198	0.116662	0.340754	0.566213	0.591255	0.834666	0.873162	0.908865	0.946958	0.960147
586	0.000841186	0.116822	0.341108	0.56691	0.591837	0.835245	0.873642	0.909192	0.947267	0.96039
587	0.000841174	0.116982	0.341462	0.567606	0.592418	0.835822	0.87412	0.909519	0.947574	0.960632
588	0.000841163	0.117143	0.341816	0.5683	0.592998	0.836398	0.874597	0.909843	0.947879	0.960872
589	0.000841151	0.117303	0.342171	0.568993	0.593578	0.836972	0.875072	0.910167	0.948183	0.961111
590	0.000841139	0.117463	0.342525	0.569685	0.594157	0.837544	0.875545	0.910489	0.948486	0.961349
591	0.000841128	0.117623	0.34288	0.570375	0.594735	0.838114	0.876017	0.910809	0.948788	0.961586
592	0.000841116	0.117783	0.343234	0.571064	0.595313	0.838682	0.876487	0.911128	0.949088	0.961821
593	0.000841104	0.117942	0.343589	0.571751	0.59589	0.839249	0.876956	0.911446	0.949386	0.962055
594	0.000841093	0.118102	0.343944	0.572437	0.596467	0.839814	0.877423	0.911762	0.949684	0.962288
595	0.000841081	0.118262	0.344299	0.573121	0.597043	0.840378	0.877889	0.912077	0.94998	0.962519
596	0.00084107	0.118422	0.344653	0.573804	0.597618	0.840939	0.878353	0.91239	0.950275	0.96275
597	0.000841058	0.118582	0.345008	0.574485	0.598193	0.841499	0.878815	0.912702	0.950568	0.962978
598	0.000841047	0.118741	0.345363	0.575165	0.598767	0.842058	0.879276	0.913013	0.95086	0.963206
599	0.000841035	0.118901	0.345718	0.575844	0.599341	0.842614	0.879735	0.913322	0.951151	0.963433
600	0.000841024	0.119061	0.346073	0.576521	0.599914	0.843169	0.880192	0.913629	0.95144	0.963658
601	0.000841012	0.11922	0.346429	0.577197	0.600487	0.843722	0.880649	0.913936	0.951728	0.963882
602	0.000841001	0.11938	0.346784	0.577871	0.601059	0.844274	0.881103	0.914241	0.952015	0.964104
603	0.000840989	0.119539	0.347139	0.578544	0.60163	0.844823	0.881556	0.914544	0.952301	0.964326
604	0.000840978	0.119699	0.347495	0.579215	0.602201	0.845372	0.882008	0.914847	0.952585	0.964546
605	0.000840966	0.119858	0.34785	0.579885	0.602771	0.845918	0.882458	0.915147	0.952868	0.964765
606	0.000840955	0.120018	0.348206	0.580554	0.603341	0.846463	0.882906	0.915447	0.953149	0.964983
607	0.000840944	0.120177	0.348561	0.581221	0.60391	0.847006	0.883353	0.915745	0.95343	0.9652
608	0.000840932	0.120336	0.348917	0.581887	0.604479	0.847547	0.883798	0.916042	0.953709	0.965415
609	0.000840921	0.120496	0.349272	0.582551	0.605047	0.848087	0.884242	0.916337	0.953987	0.96563
610	0.00084091	0.120655	0.349628	0.583214	0.605615	0.848625	0.884685	0.916631	0.954263	0.965843
611	0.000840898	0.120814	0.349984	0.583875	0.606182	0.849161	0.885125	0.916923	0.954538	0.966055
612	0.000840887	0.120974	0.35034	0.584535	0.606748	0.849696	0.885565	0.917215	0.954812	0.966265
613	0.000840876	0.121133	0.350696	0.585194	0.607314	0.850229	0.886003	0.917504	0.955085	0.966475
614	0.000840864	0.121292	0.351052	0.585851	0.60788	0.85076	0.886439	0.917793	0.955356	0.966683
615	0.000840853	0.121451	0.351408	0.586506	0.608445	0.85129	0.886874	0.91808	0.955627	0.966891
616	0.000840842	0.12161	0.351765	0.587161	0.609009	0.851818	0.887308	0.918366	0.955896	0.967097
617	0.000840831	0.121769	0.352121	0.587814	0.609573	0.852344	0.88774	0.918651	0.956163	0.967302
618	0.00084082	0.121928	0.352477	0.588465	0.610136	0.852869	0.88817	0.918934	0.95643	0.967506
619	0.000840808	0.122087	0.352834	0.589115	0.610699	0.853392	0.888599	0.919216	0.956695	0.967708
620	0.000840797	0.122246	0.35319	0.589764	0.611262	0.853914	0.889027	0.919496	0.956959	0.96791
621	0.000840786	0.122405	0.353547	0.590411	0.611824	0.854434	0.889453	0.919775	0.957222	0.96811
622	0.000840775	0.122564	0.353903	0.591057	0.612385	0.854952	0.889878	0.920053	0.957484	0.96831
623	0.000840764	0.122723	0.35426	0.591701	0.612946	0.855469	0.890301	0.92033	0.957744	0.968508
624	0.000840753	0.122881	0.354617	0.592344	0.613506	0.855984	0.890723	0.920605	0.958003	0.968705
625	0.000840742	0.12304	0.354974	0.592986	0.614066	0.856497	0.891143	0.920879	0.958261	0.968901
626	0.000840731	0.123199	0.355331	0.593626	0.614626	0.857009	0.891562	0.921152	0.958518	0.969096
627	0.00084072	0.123358	0.355688	0.594265	0.615185	0.857519	0.891979	0.921423	0.958773	0.96929
628	0.000840709	0.123516	0.356045	0.594902	0.615743	0.858027	0.892396	0.921693	0.959027	0.969483
629	0.000840698	0.123675	0.356402	0.595538	0.616301	0.858534	0.89281	0.921962	0.95928	0.969674
630	0.000840687	0.123833	0.356759	0.596173	0.616859	0.85904	0.893224	0.92223	0.959532	0.969865
631	0.000840676	0.123992	0.357116	0.596806	0.617416	0.859543	0.893635	0.922496	0.959783	0.970055
632	0.000840665	0.124151	0.357474	0.597438	0.617972	0.860046	0.894046	0.922761	0.960033	0.970243
633	0.000840654	0.124309	0.357831	0.598068	0.618528	0.860546	0.894455	0.923025	0.960281	0.97043
634	0.000840643	0.124468	0.358189	0.598697	0.619084	0.861045	0.894863	0.923288	0.960528	0.970617
635	0.000840632	0.124626	0.358546	0.599325	0.619639	0.861542	0.895269	0.923549	0.960774	0.970802
636	0.000840621	0.124784	0.358904	0.599951	0.620194	0.862038	0.895674	0.923809	0.961019	0.970986
637	0.00084061	0.124943	0.359261	0.600576	0.620748	0.862532	0.896077	0.924068	0.961262	0.97117
638	0.000840599	0.125101	0.359619	0.6012	0.621302	0.863025	0.896479	0.924326	0.961505	0.971352
639	0.000840588	0.125259	0.359977	0.601822	0.621855	0.863516	0.89688	0.924582	0.961746	0.971533
640	0.000840578	0.125418	0.360335	0.602443	0.622408	0.864005	0.897279	0.924837	0.961986	0.971713
641	0.000840567	0.125576	0.360693	0.603062	0.622961	0.864493	0.897677	0.925091	0.962225	0.971892
642	0.000840556	0.125734	0.361051	0.60368	0.623513	0.86498	0.898074	0.925344	0.962463	0.97207
643	0.000840545	0.125892	0.361409	0.604297	0.624064	0.865464	0.898469	0.925596	0.962699	0.972247
644	0.000840534	0.12605	0.361767	0.604912	0.624615	0.865947	0.898863	0.925846	0.962935	0.972423
645	0.000840524	0.126208	0.362126	0.605526	0.625166	0.866429	0.899256	0.926095	0.963169	0.972599
646	0.000840513	0.126366	0.362484	0.606138	0.625716	0.866909	0.899647	0.926344	0.963402	0.972773
647	0.000840502	0.126525	0.362842	0.606749	0.626266	0.867388	0.900037	0.926591	0.963634	0.972946
648	0.000840492	0.126682	0.363201	0.607359	0.626816	0.867865	0.900425	0.926836	0.963865	0.973118
649	0.000840481	0.12684	0.36356	0.607968	0.627365	0.86834	0.900813	0.927081	0.964095	0.973289
650	0.00084047	0.126998	0.363918	0.608575	0.627913	0.868814	0.901198	0.927325	0.964323	0.973459
651	0.00084046	0.127156	0.364277	0.60918	0.628461	0.869287	0.901583	0.927567	0.964551	0.973628
652	0.000840449	0.127314	0.364636	0.609785	0.629009	0.869757	0.901966	0.927808	0.964777	0.973797
653	0.000840438	0.127472	0.364994	0.610388	0.629556	0.870227	0.902348	0.928048	0.965002	0.973964
654	0.000840428	0.12763	0.365353	0.610989	0.630103	0.870695	0.902729	0.928288	0.965226	0.97413
655	0.000840417	0.127788	0.365712	0.61159	0.63065	0.871161	0.903108	0.928526	0.965449	0.974295
656	0.000840407	0.127945	0.366071	0.612189	0.631196	0.871626	0.903486	0.928762	0.965671	0.97446
657	0.000840396	0.128103	0.366431	0.612786	0.631742	0.872089	0.903863	0.928998	0.965892	0.974623
658	0.000840386	0.128261	0.36679	0.613383	0.632287	0.872551	0.904238	0.929233	0.966112	0.974786
659	0.000840375	0.128418	0.367149	0.613978	0.632832	0.873011	0.904612	0.929467	0.96633	0.974947
660	0.000840365	0.128576	0.367508	0.614571	0.633376	0.87347	0.904985	0.929699	0.966547	0.975108
661	0.000840354	0.128733	0.367868	0.615163	0.63392	0.873927	0.905356	0.929931	0.966764	0.975268
662	0.000840344	0.128891	0.368227	0.615754	0.634464	0.874383	0.905726	0.930162	0.966979	0.975427
663	0.000840333	0.129049	0.368587	0.616344	0.635007	0.874837	0.906095	0.930391	0.967193	0.975585
664	0.000840323	0.129206	0.368946	0.616932	0.63555	0.87529	0.906463	0.93062	0.967406	0.975742
665	0.000840312	0.129363	0.369306	0.617519	0.636092	0.875741	0.906829	0.930847	0.967618	0.975898
666	0.000840302	0.129521	0.369666	0.618105	0.636634	0.876191	0.907194	0.931074	0.967829	0.976053
667	0.000840292	0.129678	0.370026	0.618689	0.637176	0.876639	0.907558	0.9313	0.968039	0.976207
668	0.000840281	0.129836	0.370385	0.619272	0.637717	0.877086	0.90792	0.931524	0.968247	0.976361
669	0.000840271	0.129993	0.370745	0.619854	0.638258	0.877531	0.908282	0.931748	0.968455	0.976513
670	0.000840261	0.13015	0.371105	0.620434	0.638798	0.877975	0.908642	0.931971	0.968661	0.976665
671	0.00084025	0.130307	0.371465	0.621014	0.639339	0.878418	0.909	0.932193	0.968867	0.976815
672	0.00084024	0.130465	0.371826	0.621591	0.639878	0.878859	0.909358	0.932414	0.969071	0.976965
673	0.00084023	0.130622	0.372186	0.622168	0.640418	0.879298	0.909714	0.932634	0.969274	0.977114
674	0.00084022	0.130779	0.372546	0.622743	0.640956	0.879736	0.910069	0.932853	0.969477	0.977262
675	0.000840209	0.130936	0.372906	0.623317	0.641495	0.880173	0.910423	0.933071	0.969678	0.97741
676	0.000840199	0.131093	0.373267	0.62389	0.642033	0.880608	0.910775	0.933288	0.969878	0.977556
677	0.000840189	0.13125	0.373627	0.624461	0.642571	0.881042	0.911127	0.933504	0.970077	0.977702
678	0.000840179	0.131407	0.373988	0.625031	0.643108	0.881474	0.911477	0.93372	0.970275	0.977846
679	0.000840169	0.131564	0.374348	0.6256	0.643645	0.881905	0.911825	0.933934	0.970472	0.97799
680	0.000840158	0.131721	0.374709	0.626167	0.644182	0.882334	0.912173	0.934148	0.970668	0.978133
681	0.000840148	0.131878	0.37507	0.626733	0.644718	0.882762	0.912519	0.93436	0.970863	0.978275
682	0.000840138	0.132035	0.37543	0.627298	0.645254	0.883189	0.912864	0.934572	0.971057	0.978417
683	0.000840128	0.132192	0.375791	0.627862	0.64579	0.883614	0.913208	0.934783	0.97125	0.978557
684	0.000840118	0.132349	0.376152	0.628424	0.646325	0.884038	0.913551	0.934993	0.971442	0.978697
685	0.000840108	0.132506	0.376513	0.628985	0.64686	0.88446	0.913893	0.935202	0.971632	0.978836
686	0.000840098	0.132662	0.376874	0.629545	0.647394	0.884881	0.914233	0.93541	0.971822	0.978974
687	0.000840088	0.132819	0.377235	0.630104	0.647928	0.885301	0.914572	0.935618	0.972011	0.979111
688	0.000840078	0.132976	0.377596	0.630661	0.648462	0.885719	0.91491	0.935824	0.972199	0.979247
689	0.000840068	0.133132	0.377958	0.631217	0.648995	0.886135	0.915246	0.936029	0.972385	0.979383
690	0.000840058	0.133289	0.378319	0.631772	0.649528	0.886551	0.915582	0.936234	0.972571	0.979518
691	0.000840048	0.133446	0.37868	0.632325	0.650061	0.886965	0.915916	0.936438	0.972756	0.979652
692	0.000840038	0.133602	0.379042	0.632878	0.650593	0.887377	0.916249	0.936641	0.97294	0.979785
693	0.000840028	0.133759	0.379403	0.633429	0.651125	0.887788	0.916581	0.936843	0.973122	0.979917
694	0.000840018	0.133915	0.379765	0.633979	0.651656	0.888198	0.916912	0.937044	0.973304	0.980049
695	0.000840008	0.134072	0.380126	0.634527	0.652187	0.888606	0.917242	0.937244	0.973485	0.98018
696	0.000839998	0.134228	0.380488	0.635074	0.652718	0.889013	0.91757	0.937444	0.973664	0.98031
697	0.000839988	0.134385	0.380849	0.63562	0.653248	0.889419	0.917897	0.937642	0.973843	0.98044
698	0.000839979	0.134541	0.381211	0.636165	0.653778	0.889823	0.918223	0.93784	0.974021	0.980568
699	0.000839969	0.134697	0.381573	0.636709	0.654308	0.890226	0.918548	0.938037	0.974198	0.980696
700	0.000839959	0.134854	0.381935	0.637251	0.654837	0.890628	0.918872	0.938233	0.974373	0.980823
701	0.000839949	0.13501	0.382297	0.637793	0.655366	0.891028	0.919194	0.938428	0.974548	0.980949
702	0.000839939	0.135166	0.382659	0.638332	0.655895	0.891427	0.919516	0.938622	0.974722	0.981075
703	0.000839929	0.135322	0.383021	0.638871	0.656423	0.891824	0.919836	0.938815	0.974895	0.9812
704	0.00083992	0.135479	0.383383	0.639409	0.656951	0.89222	0.920155	0.939008	0.975067	0.981324
705	0.00083991	0.135635	0.383745	0.639945	0.657479	0.892615	0.920473	0.9392	0.975238	0.981447
706	0.0008399	0.135791	0.384107	0.64048	0.658006	0.893009	0.92079	0.939391	0.975408	0.98157
707	0.000839891	0.135947	0.38447	0.641014	0.658532	0.893401	0.921105	0.939581	0.975577	0.981691
708	0.000839881	0.136103	0.384832	0.641547	0.659059	0.893792	0.92142	0.93977	0.975745	0.981812
709	0.000839871	0.136259	0.385194	0.642078	0.659585	0.894181	0.921733	0.939959	0.975912	0.981933
710	0.000839862	0.136415	0.385557	0.642608	0.660111	0.894569	0.922046	0.940146	0.976078	0.982053
711	0.000839852	0.136571	0.385919	0.643138	0.660636	0.894956	0.922357	0.940333	0.976244	0.982172
712	0.000839842	0.136727	0.386282	0.643666	0.661161	0.895342	0.922667	0.940519	0.976408	0.98229
713	0.000839833	0.136883	0.386644	0.644192	0.661686	0.895726	0.922976	0.940704	0.976571	0.982407
714	0.000839823	0.137039	0.387007	0.644718	0.66221	0.896109	0.923283	0.940888	0.976734	0.982524
715	0.000839813	0.137195	0.38737	0.645242	0.662734	0.89649	0.92359	0.941072	0.976895	0.98264
716	0.000839804	0.13735	0.387732	0.645765	0.663257	0.896871	0.923895	0.941255	0.977056	0.982756
717	0.000839794	0.137506	0.388095	0.646287	0.663781	0.89725	0.9242	0.941437	0.977216	0.98287
718	0.000839785	0.137662	0.388458	0.646808	0.664304	0.897627	0.924503	0.941618	0.977374	0.982984
719	0.000839775	0.137818	0.388821	0.647328	0.664826	0.898004	0.924805	0.941798	0.977532	0.983098
720	0.000839766	0.137973	0.389184	0.647846	0.665348	0.898379	0.925106	0.941978	0.977689	0.983211
721	0.000839756	0.138129	0.389547	0.648364	0.66587	0.898753	0.925406	0.942156	0.977845	0.983323
722	0.000839747	0.138284	0.38991	0.64888	0.666391	0.899125	0.925705	0.942334	0.978	0.983434
723	0.000839737	0.13844	0.390273	0.649395	0.666913	0.899497	0.926003	0.942512	0.978155	0.983545
724	0.000839728	0.138596	0.390636	0.649909	0.667433	0.899867	0.9263	0.942688	0.978308	0.983655
725	0.000839718	0.138751	0.390999	0.650422	0.667954	0.900236	0.926595	0.942864	0.97846	0.983764
726	0.000839709	0.138907	0.391362	0.650933	0.668474	0.900603	0.92689	0.943038	0.978612	0.983872
727	0.0008397	0.139062	0.391726	0.651444	0.668993	0.900969	0.927183	0.943212	0.978763	0.983981
728	0.00083969	0.139217	0.392089	0.651953	0.669513	0.901334	0.927475	0.943386	0.978912	0.984088
729	0.000839681	0.139373	0.392452	0.652461	0.670032	0.901698	0.927767	0.943558	0.979061	0.984195
730	0.000839672	0.139528	0.392816	0.652968	0.67055	0.902061	0.928057	0.94373	0.979209	0.984301
731	0.000839662	0.139683	0.393179	0.653474	0.671068	0.902422	0.928346	0.943901	0.979356	0.984406
732	0.000839653	0.139839	0.393543	0.653979	0.671586	0.902782	0.928634	0.944071	0.979503	0.984511
733	0.000839644	0.139994	0.393906	0.654482	0.672104	0.903141	0.928921	0.944241	0.979648	0.984615
734	0.000839634	0.140149	0.39427	0.654985	0.672621	0.903498	0.929207	0.94441	0.979793	0.984719
735	0.000839625	0.140304	0.394633	0.655486	0.673138	0.903854	0.929492	0.944577	0.979936	0.984821
736	0.000839616	0.14046	0.394997	0.655986	0.673654	0.904209	0.929775	0.944745	0.980079	0.984924
737	0.000839607	0.140615	0.395361	0.656486	0.67417	0.904563	0.930058	0.944911	0.980221	0.985025
738	0.000839597	0.14077	0.395725	0.656984	0.674686	0.904916	0.93034	0.945077	0.980362	0.985126
739	0.000839588	0.140925	0.396088	0.657481	0.675201	0.905267	0.93062	0.945242	0.980503	0.985227
740	0.000839579	0.14108	0.396452	0.657977	0.675716	0.905618	0.9309	0.945406	0.980642	0.985327
741	0.00083957	0.141235	0.396816	0.658471	0.676231	0.905967	0.931178	0.94557	0.980781	0.985426
742	0.000839561	0.14139	0.39718	0.658965	0.676745	0.906314	0.931456	0.945733	0.980919	0.985524
743	0.000839551	0.141545	0.397544	0.659458	0.677259	0.906661	0.931732	0.945895	0.981056	0.985622
744	0.000839542	0.141699	0.397908	0.659949	0.677773	0.907006	0.932008	0.946056	0.981192	0.98572
745	0.000839533	0.141854	0.398272	0.660439	0.678286	0.907351	0.932282	0.946217	0.981327	0.985817
746	0.000839524	0.142009	0.398636	0.660929	0.678799	0.907694	0.932555	0.946377	0.981462	0.985913
747	0.000839515	0.142164	0.399	0.661417	0.679311	0.908035	0.932828	0.946536	0.981595	0.986008
748	0.000839506	0.142319	0.399364	0.661904	0.679823	0.908376	0.933099	0.946695	0.981728	0.986103
749	0.000839497	0.142473	0.399729	0.66239	0.680335	0.908716	0.933369	0.946852	0.98186	0.986198
750	0.000839488	0.142628	0.400093	0.662875	0.680846	0.909054	0.933638	0.947009	0.981991	0.986292
751	0.000839479	0.142783	0.400457	0.663359	0.681357	0.909391	0.933906	0.947166	0.982122	0.986385
752	0.00083947	0.142937	0.400821	0.663842	0.681868	0.909727	0.934174	0.947322	0.982251	0.986478
753	0.000839461	0.143092	0.401186	0.664324	0.682378	0.910062	0.93444	0.947477	0.98238	0.98657
754	0.000839452	0.143247	0.40155	0.664804	0.682888	0.910395	0.934705	0.947631	0.982508	0.986662
755	0.000839443	0.143401	0.401914	0.665284	0.683397	0.910728	0.934969	0.947785	0.982636	0.986753
756	0.000839434	0.143556	0.402279	0.665763	0.683907	0.911059	0.935232	0.947938	0.982762	0.986843
757	0.000839425	0.14371	0.402643	0.66624	0.684415	0.911389	0.935494	0.94809	0.982888	0.986933
758	0.000839416	0.143865	0.403008	0.666717	0.684924	0.911718	0.935755	0.948241	0.983013	0.987023
759	0.000839407	0.144019	0.403372	0.667192	0.685432	0.912046	0.936016	0.948392	0.983137	0.987111
760	0.000839398	0.144173	0.403737	0.667667	0.685939	0.912373	0.936275	0.948543	0.98326	0.9872
761	0.000839389	0.144328	0.404101	0.66814	0.686447	0.912698	0.936533	0.948692	0.983383	0.987287
762	0.00083938	0.144482	0.404466	0.668613	0.686954	0.913023	0.93679	0.948841	0.983505	0.987375
763	0.000839372	0.144636	0.404831	0.669084	0.68746	0.913346	0.937046	0.948989	0.983626	0.987461
764	0.000839363	0.144791	0.405195	0.669554	0.687966	0.913669	0.937301	0.949137	0.983746	0.987548
765	0.000839354	0.144945	0.40556	0.670024	0.688472	0.91399	0.937555	0.949284	0.983866	0.987633
766	0.000839345	0.145099	0.405925	0.670492	0.688978	0.91431	0.937809	0.94943	0.983984	0.987718
767	0.000839336	0.145253	0.406289	0.670959	0.689483	0.914628	0.938061	0.949576	0.984103	0.987803
768	0.000839328	0.145407	0.406654	0.671425	0.689987	0.914946	0.938312	0.949721	0.98422	0.987887
769	0.000839319	0.145561	0.407019	0.671891	0.690492	0.915263	0.938562	0.949865	0.984336	0.987971
770	0.00083931	0.145715	0.407384	0.672355	0.690995	0.915578	0.938812	0.950009	0.984452	0.988054
771	0.000839301	0.145869	0.407749	0.672818	0.691499	0.915893	0.93906	0.950152	0.984567	0.988136
772	0.000839293	0.146023	0.408113	0.67328	0.692002	0.916206	0.939307	0.950294	0.984682	0.988218
773	0.000839284	0.146177	0.408478	0.673741	0.692505	0.916518	0.939554	0.950436	0.984795	0.9883
774	0.000839275	0.146331	0.408843	0.674202	0.693007	0.91683	0.939799	0.950577	0.984908	0.988381
775	0.000839267	0.146485	0.409208	0.674661	0.693509	0.91714	0.940044	0.950717	0.985021	0.988461
776	0.000839258	0.146639	0.409573	0.675119	0.694011	0.917449	0.940287	0.950857	0.985132	0.988541
777	0.000839249	0.146793	0.409938	0.675576	0.694512	0.917757	0.94053	0.950997	0.985243	0.988621
778	0.000839241	0.146946	0.410303	0.676033	0.695013	0.918063	0.940771	0.951135	0.985353	0.9887
779	0.000839232	0.1471	0.410668	0.676488	0.695513	0.918369	0.941012	0.951273	0.985462	0.988779
780	0.000839223	0.147254	0.411033	0.676942	0.696013	0.918674	0.941252	0.951411	0.985571	0.988857
781	0.000839215	0.147408	0.411398	0.677395	0.696513	0.918977	0.941491	0.951547	0.985679	0.988934
782	0.000839206	0.147561	0.411763	0.677848	0.697012	0.91928	0.941729	0.951684	0.985786	0.989011
783	0.000839198	0.147715	0.412128	0.678299	0.697511	0.919582	0.941966	0.951819	0.985893	0.989088
784	0.000839189	0.147868	0.412493	0.67875	0.69801	0.919882	0.942202	0.951954	0.985999	0.989164
785	0.000839181	0.148022	0.412859	0.679199	0.698508	0.920181	0.942437	0.952088	0.986104	0.98924
786	0.000839172	0.148176	0.413224	0.679648	0.699005	0.92048	0.942671	0.952222	0.986208	0.989315
787	0.000839164	0.148329	0.413589	0.680095	0.699503	0.920777	0.942904	0.952355	0.986312	0.98939
788	0.000839155	0.148483	0.413954	0.680542	0.699999	0.921073	0.943136	0.952488	0.986415	0.989465
789	0.000839147	0.148636	0.414319	0.680987	0.700496	0.921369	0.943368	0.95262	0.986518	0.989538
790	0.000839138	0.148789	0.414685	0.681432	0.700992	0.921663	0.943598	0.952751	0.98662	0.989612
791	0.00083913	0.148943	0.41505	0.681876	0.701488	0.921956	0.943828	0.952882	0.986721	0.989685
792	0.000839121	0.149096	0.415415	0.682319	0.701983	0.922248	0.944056	0.953012	0.986821	0.989757
793	0.000839113	0.149249	0.41578	0.68276	0.702478	0.922539	0.944284	0.953142	0.986921	0.98983
794	0.000839105	0.149403	0.416145	0.683201	0.702972	0.922829	0.944511	0.953271	0.98702	0.989901
795	0.000839096	0.149556	0.416511	0.683641	0.703466	0.923118	0.944737	0.9534	0.987119	0.989972
796	0.000839088	0.149709	0.416876	0.68408	0.70396	0.923406	0.944962	0.953528	0.987217	0.990043
797	0.000839079	0.149862	0.417241	0.684518	0.704453	0.923693	0.945186	0.953655	0.987314	0.990114
798	0.000839071	0.150015	0.417607	0.684956	0.704946	0.923979	0.945409	0.953782	0.98741	0.990184
799	0.000839063	0.150168	0.417972	0.685392	0.705439	0.924264	0.945631	0.953908	0.987506	0.990253
800	0.000839054	0.150321	0.418337	0.685827	0.705931	0.924548	0.945853	0.954034	0.987602	0.990322
801	0.000839046	0.150474	0.418702	0.686262	0.706422	0.924831	0.946073	0.954159	0.987696	0.990391
802	0.000839038	0.150627	0.419068	0.686695	0.706914	0.925114	0.946293	0.954284	0.98779	0.990459
803	0.00083903	0.15078	0.419433	0.687128	0.707404	0.925395	0.946511	0.954408	0.987884	0.990527
804	0.000839021	0.150933	0.419798	0.68756	0.707895	0.925675	0.946729	0.954531	0.987977	0.990594
805	0.000839013	0.151086	0.420164	0.68799	0.708385	0.925954	0.946946	0.954654	0.988069	0.990661
806	0.000839005	0.151239	0.420529	0.68842	0.708874	0.926232	0.947162	0.954777	0.98816	0.990728
807	0.000838997	0.151392	0.420895	0.688849	0.709364	0.926509	0.947378	0.954899	0.988251	0.990794
808	0.000838988	0.151545	0.42126	0.689278	0.709852	0.926785	0.947592	0.95502	0.988342	0.99086
809	0.00083898	0.151697	0.421625	0.689705	0.710341	0.92706	0.947805	0.955141	0.988431	0.990925
810	0.000838972	0.15185	0.421991	0.690131	0.710828	0.927334	0.948018	0.955261	0.98852	0.99099
811	0.000838964	0.152003	0.422356	0.690557	0.711316	0.927608	0.94823	0.955381	0.988609	0.991055
812	0.000838956	0.152155	0.422721	0.690981	0.711803	0.92788	0.948441	0.9555	0.988697	0.991119
813	0.000838948	0.152308	0.423087	0.691405	0.71229	0.928151	0.948651	0.955619	0.988784	0.991183
814	0.000838939	0.152461	0.423452	0.691828	0.712776	0.928422	0.94886	0.955737	0.988871	0.991246
815	0.000838931	0.152613	0.423817	0.69225	0.713262	0.928691	0.949068	0.955855	0.988957	0.991309
816	0.000838923	0.152766	0.424183	0.692671	0.713747	0.92896	0.949276	0.955972	0.989043	0.991372
817	0.000838915	0.152918	0.424548	0.693091	0.714232	0.929227	0.949482	0.956089	0.989128	0.991434
818	0.000838907	0.153071	0.424914	0.69351	0.714716	0.929494	0.949688	0.956205	0.989212	0.991496
819	0.000838899	0.153223	0.425279	0.693929	0.7152	0.929759	0.949893	0.95632	0.989296	0.991557
820	0.000838891	0.153375	0.425644	0.694346	0.715684	0.930024	0.950097	0.956436	0.989379	0.991618
821	0.000838883	0.153528	0.42601	0.694763	0.716167	0.930288	0.9503	0.95655	0.989462	0.991679
822	0.000838875	0.15368	0.426375	0.695179	0.71665	0.930551	0.950503	0.956664	0.989544	0.991739
823	0.000838867	0.153832	0.42674	0.695594	0.717132	0.930813	0.950704	0.956778	0.989626	0.991799
824	0.000838859	0.153985	0.427106	0.696008	0.717614	0.931074	0.950905	0.956891	0.989707	0.991859
825	0.000838851	0.154137	0.427471	0.696422	0.718095	0.931334	0.951105	0.957004	0.989787	0.991918
826	0.000838843	0.154289	0.427836	0.696834	0.718576	0.931593	0.951304	0.957116	0.989867	0.991977
827	0.000838835	0.154441	0.428202	0.697246	0.719057	0.931851	0.951502	0.957228	0.989946	0.992036
828	0.000838827	0.154593	0.428567	0.697657	0.719537	0.932109	0.9517	0.957339	0.990025	0.992094
829	0.000838819	0.154745	0.428932	0.698067	0.720017	0.932365	0.951896	0.95745	0.990103	0.992152
830	0.000838811	0.154897	0.429297	0.698476	0.720496	0.932621	0.952092	0.95756	0.990181	0.992209
831	0.000838803	0.15505	0.429663	0.698884	0.720975	0.932875	0.952287	0.95767	0.990258	0.992266
832	0.000838795	0.155201	0.430028	0.699292	0.721453	0.933129	0.952481	0.957779	0.990335	0.992323
833	0.000838788	0.155353	0.430393	0.699698	0.721931	0.933382	0.952675	0.957888	0.990411	0.99238
834	0.00083878	0.155505	0.430758	0.700104	0.722409	0.933634	0.952867	0.957997	0.990487	0.992436
835	0.000838772	0.155657	0.431124	0.700509	0.722886	0.933885	0.953059	0.958105	0.990562	0.992491
836	0.000838764	0.155809	0.431489	0.700913	0.723362	0.934135	0.95325	0.958212	0.990636	0.992547
837	0.000838756	0.155961	0.431854	0.701317	0.723838	0.934384	0.95344	0.958319	0.99071	0.992602
838	0.000838748	0.156113	0.432219	0.701719	0.724314	0.934633	0.953629	0.958426	0.990784	0.992657
839	0.000838741	0.156264	0.432585	0.702121	0.724789	0.93488	0.953818	0.958532	0.990857	0.992711
840	0.000838733	0.156416	0.43295	0.702522	0.725264	0.935127	0.954006	0.958638	0.990929	0.992765
841	0.000838725	0.156568	0.433315	0.702922	0.725738	0.935373	0.954193	0.958743	0.991001	0.992819
842	0.000838717	0.15672	0.43368	0.703322	0.726212	0.935618	0.954379	0.958848	0.991072	0.992872
843	0.00083871	0.156871	0.434045	0.70372	0.726685	0.935862	0.954564	0.958952	0.991143	0.992925
844	0.000838702	0.157023	0.43441	0.704118	0.727158	0.936105	0.954749	0.959056	0.991214	0.992978
845	0.000838694	0.157174	0.434775	0.704515	0.727631	0.936347	0.954933	0.959159	0.991284	0.993031
846	0.000838686	0.157326	0.43514	0.704911	0.728103	0.936589	0.955116	0.959262	0.991353	0.993083
847	0.000838679	0.157477	0.435505	0.705307	0.728574	0.93683	0.955298	0.959365	0.991422	0.993135
848	0.000838671	0.157629	0.43587	0.705701	0.729045	0.937069	0.95548	0.959467	0.991491	0.993186
849	0.000838663	0.15778	0.436235	0.706095	0.729516	0.937308	0.955661	0.959569	0.991559	0.993237
850	0.000838656	0.157931	0.4366	0.706488	0.729986	0.937546	0.955841	0.95967	0.991626	0.993288
851	0.000838648	0.158083	0.436965	0.706881	0.730456	0.937784	0.95602	0.959771	0.991693	0.993339
852	0.00083864	0.158234	0.43733	0.707272	0.730925	0.93802	0.956198	0.959871	0.99176	0.993389
853	0.000838633	0.158385	0.437695	0.707663	0.731394	0.938256	0.956376	0.959971	0.991826	0.993439
854	0.000838625	0.158537	0.43806	0.708053	0.731862	0.938491	0.956553	0.960071	0.991891	0.993489
855	0.000838618	0.158688	0.438425	0.708442	0.73233	0.938724	0.956729	0.96017	0.991957	0.993538
856	0.00083861	0.158839	0.43879	0.708831	0.732797	0.938958	0.956905	0.960269	0.992021	0.993587
857	0.000838603	0.15899	0.439154	0.709218	0.733264	0.93919	0.95708	0.960367	0.992085	0.993636
858	0.000838595	0.159141	0.439519	0.709605	0.733731	0.939421	0.957254	0.960465	0.992149	0.993684
859	0.000838587	0.159292	0.439884	0.709991	0.734197	0.939652	0.957427	0.960563	0.992212	0.993732
860	0.00083858	0.159444	0.440249	0.710377	0.734662	0.939882	0.957599	0.96066	0.992275	0.99378
861	0.000838572	0.159595	0.440613	0.710762	0.735127	0.940111	0.957771	0.960757	0.992338	0.993828
862	0.000838565	0.159746	0.440978	0.711145	0.735591	0.940339	0.957942	0.960853	0.9924	0.993875
863	0.000838557	0.159896	0.441343	0.711529	0.736055	0.940567	0.958112	0.960949	0.992461	0.993922
864	0.00083855	0.160047	0.441707	0.711911	0.736519	0.940793	0.958282	0.961045	0.992522	0.993969
865	0.000838542	0.160198	0.442072	0.712293	0.736982	0.941019	0.958451	0.96114	0.992583	0.994015
866	0.000838535	0.160349	0.442437	0.712674	0.737445	0.941244	0.958619	0.961235	0.992643	0.994061
867	0.000838528	0.1605	0.442801	0.713054	0.737907	0.941468	0.958786	0.961329	0.992703	0.994107
868	0.00083852	0.160651	0.443166	0.713434	0.738368	0.941692	0.958953	0.961423	0.992762	0.994153
869	0.000838513	0.160802	0.44353	0.713812	0.738829	0.941914	0.959119	0.961517	0.992821	0.994198
870	0.000838505	0.160952	0.443894	0.71419	0.73929	0.942136	0.959284	0.96161	0.992879	0.994243
871	0.000838498	0.161103	0.444259	0.714568	0.73975	0.942357	0.959449	0.961703	0.992937	0.994288
872	0.000838491	0.161254	0.444623	0.714944	0.74021	0.942578	0.959612	0.961796	0.992995	0.994332
873	0.000838483	0.161404	0.444988	0.71532	0.740669	0.942797	0.959776	0.961888	0.993052	0.994377
874	0.000838476	0.161555	0.445352	0.715695	0.741128	0.943016	0.959938	0.96198	0.993109	0.994421
875	0.000838468	0.161705	0.445716	0.71607	0.741586	0.943234	0.9601	0.962071	0.993165	0.994464
876	0.000838461	0.161856	0.44608	0.716444	0.742044	0.943451	0.960261	0.962162	0.993221	0.994508
877	0.000838454	0.162006	0.446444	0.716817	0.742501	0.943668	0.960421	0.962253	0.993276	0.994551
878	0.000838446	0.162157	0.446809	0.717189	0.742958	0.943883	0.960581	0.962343	0.993331	0.994594
879	0.000838439	0.162307	0.447173	0.717561	0.743414	0.944098	0.960739	0.962433	0.993386	0.994636
880	0.000838432	0.162458	0.447537	0.717931	0.74387	0.944313	0.960898	0.962522	0.99344	0.994679
881	0.000838425	0.162608	0.447901	0.718302	0.744325	0.944526	0.961055	0.962612	0.993494	0.994721
882	0.000838417	0.162758	0.448265	0.718671	0.74478	0.944739	0.961212	0.962701	0.993548	0.994763
883	0.00083841	0.162909	0.448629	0.71904	0.745234	0.944951	0.961368	0.962789	0.993601	0.994804
884	0.000838403	0.163059	0.448993	0.719408	0.745688	0.945162	0.961524	0.962877	0.993653	0.994846
885	0.000838396	0.163209	0.449356	0.719776	0.746141	0.945372	0.961679	0.962965	0.993706	0.994887
886	0.000838388	0.163359	0.44972	0.720142	0.746594	0.945582	0.961833	0.963053	0.993758	0.994927
887	0.000838381	0.163509	0.450084	0.720508	0.747046	0.945791	0.961986	0.96314	0.993809	0.994968
888	0.000838374	0.16366	0.450448	0.720874	0.747497	0.945999	0.962139	0.963226	0.99386	0.995008
889	0.000838367	0.16381	0.450812	0.721238	0.747949	0.946206	0.962291	0.963313	0.993911	0.995048
890	0.00083836	0.16396	0.451175	0.721602	0.748399	0.946413	0.962442	0.963399	0.993961	0.995088
891	0.000838353	0.16411	0.451539	0.721966	0.74885	0.946619	0.962593	0.963485	0.994011	0.995128
892	0.000838345	0.16426	0.451902	0.722328	0.749299	0.946824	0.962743	0.96357	0.994061	0.995167
893	0.000838338	0.16441	0.452266	0.72269	0.749749	0.947029	0.962893	0.963655	0.99411	0.995206
894	0.000838331	0.16456	0.452629	0.723052	0.750197	0.947233	0.963042	0.96374	0.994159	0.995245
895	0.000838324	0.164709	0.452993	0.723412	0.750645	0.947436	0.96319	0.963824	0.994208	0.995284
896	0.000838317	0.164859	0.453356	0.723772	0.751093	0.947638	0.963337	0.963909	0.994256	0.995322
897	0.00083831	0.165009	0.453719	0.724132	0.75154	0.94784	0.963484	0.963992	0.994303	0.99536
898	0.000838303	0.165159	0.454083	0.72449	0.751987	0.948041	0.963631	0.964076	0.994351	0.995398
899	0.000838296	0.165309	0.454446	0.724848	0.752433	0.948241	0.963776	0.964159	0.994398	0.995436
900	0.000838289	0.165458	0.454809	0.725206	0.752879	0.948441	0.963921	0.964242	0.994445	0.995473
901	0.000838282	0.165608	0.455172	0.725562	0.753324	0.94864	0.964065	0.964324	0.994491	0.995511
902	0.000838275	0.165758	0.455535	0.725918	0.753768	0.948838	0.964209	0.964406	0.994537	0.995548
903	0.000838268	0.165907	0.455898	0.726274	0.754213	0.949036	0.964352	0.964488	0.994583	0.995584
904	0.000838261	0.166057	0.456261	0.726628	0.754656	0.949232	0.964495	0.96457	0.994628	0.995621
905	0.000838254	0.166207	0.456624	0.726983	0.755099	0.949428	0.964636	0.964651	0.994673	0.995657
906	0.000838247	0.166356	0.456987	0.727336	0.755542	0.949624	0.964777	0.964732	0.994718	0.995693
907	0.00083824	0.166506	0.45735	0.727689	0.755984	0.949818	0.964918	0.964813	0.994762	0.995729
908	0.000838233	0.166655	0.457712	0.728041	0.756425	0.950013	0.965058	0.964893	0.994806	0.995765
909	0.000838226	0.166804	0.458075	0.728393	0.756866	0.950206	0.965197	0.964973	0.994849	0.9958
910	0.000838219	0.166954	0.458438	0.728743	0.757307	0.950399	0.965336	0.965053	0.994893	0.995835
911	0.000838212	0.167103	0.4588	0.729094	0.757747	0.95059	0.965474	0.965132	0.994936	0.99587
912	0.000838205	0.167253	0.459163	0.729443	0.758186	0.950782	0.965611	0.965211	0.994978	0.995905
913	0.000838198	0.167402	0.459525	0.729792	0.758625	0.950972	0.965748	0.96529	0.995021	0.99594
914	0.000838191	0.167551	0.459888	0.730141	0.759063	0.951162	0.965884	0.965369	0.995062	0.995974
915	0.000838184	0.1677	0.46025	0.730488	0.759501	0.951352	0.96602	0.965447	0.995104	0.996008
916	0.000838177	0.16785	0.460612	0.730836	0.759938	0.95154	0.966155	0.965525	0.995145	0.996042
917	0.000838171	0.167999	0.460975	0.731182	0.760375	0.951728	0.96629	0.965602	0.995186	0.996076
918	0.000838164	0.168148	0.461337	0.731528	0.760811	0.951916	0.966423	0.96568	0.995227	0.996109
919	0.000838157	0.168297	0.461699	0.731873	0.761247	0.952102	0.966557	0.965757	0.995267	0.996142
920	0.00083815	0.168446	0.462061	0.732218	0.761682	0.952288	0.966689	0.965834	0.995308	0.996175
921	0.000838143	0.168595	0.462423	0.732562	0.762117	0.952474	0.966821	0.96591	0.995347	0.996208
922	0.000838136	0.168744	0.462785	0.732905	0.762551	0.952658	0.966953	0.965986	0.995387	0.996241
923	0.00083813	0.168893	0.463147	0.733248	0.762985	0.952842	0.967084	0.966062	0.995426	0.996273
924	0.000838123	0.169042	0.463508	0.73359	0.763418	0.953026	0.967214	0.966138	0.995465	0.996305
925	0.000838116	0.169191	0.46387	0.733932	0.76385	0.953208	0.967344	0.966213	0.995503	0.996337
926	0.000838109	0.16934	0.464232	0.734273	0.764282	0.95339	0.967473	0.966289	0.995541	0.996369
927	0.000838103	0.169489	0.464593	0.734613	0.764714	0.953572	0.967602	0.966363	0.995579	0.996401
928	0.000838096	0.169637	0.464955	0.734953	0.765145	0.953753	0.96773	0.966438	0.995617	0.996432
929	0.000838089	0.169786	0.465316	0.735292	0.765575	0.953933	0.967857	0.966512	0.995654	0.996463
930	0.000838082	0.169935	0.465678	0.735631	0.766005	0.954112	0.967984	0.966586	0.995691	0.996494
931	0.000838076	0.170084	0.466039	0.735969	0.766434	0.954291	0.96811	0.96666	0.995728	0.996525
932	0.000838069	0.170232	0.4664	0.736307	0.766863	0.95447	0.968236	0.966734	0.995765	0.996556
933	0.000838062	0.170381	0.466761	0.736643	0.767291	0.954647	0.968361	0.966807	0.995801	0.996586
934	0.000838056	0.17053	0.467123	0.73698	0.767719	0.954824	0.968486	0.96688	0.995837	0.996616
935	0.000838049	0.170678	0.467484	0.737315	0.768146	0.955001	0.96861	0.966953	0.995872	0.996646
936	0.000838042	0.170827	0.467845	0.73765	0.768573	0.955177	0.968733	0.967025	0.995908	0.996676
937	0.000838036	0.170975	0.468206	0.737985	0.768999	0.955352	0.968856	0.967097	0.995943	0.996705
938	0.000838029	0.171124	0.468566	0.738319	0.769425	0.955526	0.968979	0.967169	0.995977	0.996735
939	0.000838022	0.171272	0.468927	0.738652	0.76985	0.9557	0.9691	0.967241	0.996012	0.996764
940	0.000838016	0.171421	0.469288	0.738985	0.770274	0.955874	0.969222	0.967312	0.996046	0.996793
941	0.000838009	0.171569	0.469648	0.739317	0.770698	0.956046	0.969343	0.967383	0.99608	0.996822
942	0.000838003	0.171717	0.470009	0.739649	0.771121	0.956218	0.969463	0.967454	0.996114	0.996851
943	0.000837996	0.171866	0.470369	0.73998	0.771544	0.95639	0.969582	0.967525	0.996147	0.996879
944	0.000837989	0.172014	0.47073	0.740311	0.771967	0.956561	0.969702	0.967595	0.99618	0.996907
945	0.000837983	0.172162	0.47109	0.740641	0.772388	0.956731	0.96982	0.967666	0.996213	0.996935
946	0.000837976	0.17231	0.47145	0.74097	0.772809	0.956901	0.969938	0.967736	0.996246	0.996963
947	0.00083797	0.172459	0.47181	0.741299	0.77323	0.95707	0.970056	0.967805	0.996278	0.996991
948	0.000837963	0.172607	0.472171	0.741627	0.77365	0.957239	0.970173	0.967875	0.99631	0.997019
949	0.000837957	0.172755	0.472531	0.741955	0.77407	0.957406	0.970289	0.967944	0.996342	0.997046
950	0.00083795	0.172903	0.47289	0.742282	0.774489	0.957574	0.970405	0.968013	0.996374	0.997073
951	0.000837944	0.173051	0.47325	0.742608	0.774907	0.957741	0.970521	0.968082	0.996405	0.9971
952	0.000837937	0.173199	0.47361	0.742934	0.775325	0.957907	0.970636	0.96815	0.996436	0.997127
953	0.000837931	0.173347	0.47397	0.74326	0.775743	0.958072	0.97075	0.968218	0.996467	0.997153
954	0.000837924	0.173495	0.474329	0.743585	0.776159	0.958237	0.970864	0.968286	0.996498	0.99718
955	0.000837918	0.173643	0.474689	0.743909	0.776576	0.958402	0.970978	0.968354	0.996528	0.997206
956	0.000837912	0.173791	0.475048	0.744233	0.776992	0.958566	0.971091	0.968422	0.996558	0.997232
957	0.000837905	0.173939	0.475408	0.744556	0.777407	0.958729	0.971203	0.968489	0.996588	0.997258
958	0.000837899	0.174087	0.475767	0.744879	0.777821	0.958892	0.971315	0.968556	0.996618	0.997284
959	0.000837892	0.174235	0.476126	0.745201	0.778235	0.959054	0.971426	0.968623	0.996647	0.997309
960	0.000837886	0.174382	0.476485	0.745523	0.778649	0.959215	0.971537	0.96869	0.996676	0.997335
961	0.000837879	0.17453	0.476844	0.745844	0.779062	0.959376	0.971648	0.968756	0.996705	0.99736
962	0.000837873	0.174678	0.477203	0.746165	0.779474	0.959537	0.971758	0.968822	0.996734	0.997385
963	0.000837867	0.174826	0.477562	0.746485	0.779886	0.959697	0.971867	0.968888	0.996762	0.99741
964	0.00083786	0.174973	0.477921	0.746804	0.780297	0.959856	0.971976	0.968954	0.99679	0.997434
965	0.000837854	0.175121	0.478279	0.747123	0.780708	0.960015	0.972084	0.96902	0.996818	0.997459
966	0.000837848	0.175268	0.478638	0.747442	0.781118	0.960173	0.972192	0.969085	0.996846	0.997483
967	0.000837841	0.175416	0.478997	0.74776	0.781528	0.960331	0.9723	0.96915	0.996874	0.997507
968	0.000837835	0.175564	0.479355	0.748077	0.781937	0.960488	0.972407	0.969215	0.996901	0.997531
969	0.000837829	0.175711	0.479713	0.748394	0.782346	0.960644	0.972513	0.96928	0.996928	0.997555
970	0.000837822	0.175859	0.480072	0.74871	0.782754	0.9608	0.972619	0.969344	0.996955	0.997579
971	0.000837816	0.176006	0.48043	0.749026	0.783161	0.960956	0.972725	0.969409	0.996982	0.997602
972	0.00083781	0.176153	0.480788	0.749341	0.783568	0.96111	0.97283	0.969473	0.997008	0.997625
973	0.000837804	0.176301	0.481146	0.749656	0.783974	0.961265	0.972935	0.969536	0.997034	0.997649
974	0.000837797	0.176448	0.481504	0.749971	0.78438	0.961419	0.973039	0.9696	0.99706	0.997672
975	0.000837791	0.176595	0.481861	0.750284	0.784785	0.961572	0.973142	0.969663	0.997086	0.997694
976	0.000837785	0.176743	0.482219	0.750598	0.78519	0.961725	0.973246	0.969727	0.997112	0.997717
977	0.000837779	0.17689	0.482577	0.75091	0.785594	0.961877	0.973348	0.96979	0.997137	0.99774
978	0.000837772	0.177037	0.482934	0.751223	0.785998	0.962028	0.973451	0.969852	0.997162	0.997762
979	0.000837766	0.177185	0.483292	0.751534	0.786401	0.96218	0.973553	0.969915	0.997187	0.997784
980	0.00083776	0.177332	0.483649	0.751845	0.786803	0.96233	0.973654	0.969977	0.997212	0.997806
981	0.000837754	0.177479	0.484006	0.752156	0.787205	0.96248	0.973755	0.97004	0.997236	0.997828
982	0.000837748	0.177626	0.484363	0.752466	0.787606	0.96263	0.973855	0.970102	0.997261	0.99785
983	0.000837741	0.177773	0.48472	0.752776	0.788007	0.962779	0.973955	0.970163	0.997285	0.997871
984	0.000837735	0.17792	0.485077	0.753085	0.788407	0.962927	0.974055	0.970225	0.997309	0.997892
985	0.000837729	0.178067	0.485434	0.753394	0.788807	0.963075	0.974154	0.970286	0.997333	0.997914
986	0.000837723	0.178214	0.485791	0.753702	0.789206	0.963223	0.974253	0.970348	0.997356	0.997935
987	0.000837717	0.178361	0.486147	0.75401	0.789604	0.96337	0.974351	0.970409	0.997379	0.997956
988	0.000837711	0.178508	0.486504	0.754317	0.790002	0.963516	0.974449	0.970469	0.997403	0.997976
989	0.000837705	0.178655	0.48686	0.754624	0.790399	0.963662	0.974546	0.97053	0.997426	0.997997
990	0.000837698	0.178802	0.487217	0.75493	0.790796	0.963808	0.974643	0.970591	0.997448	0.998017
991	0.000837692	0.178949	0.487573	0.755236	0.791192	0.963952	0.97474	0.970651	0.997471	0.998038
992	0.000837686	0.179095	0.487929	0.755541	0.791588	0.964097	0.974836	0.970711	0.997493	0.998058
993	0.00083768	0.179242	0.488285	0.755846	0.791983	0.964241	0.974931	0.970771	0.997516	0.998078
994	0.000837674	0.179389	0.488641	0.75615	0.792378	0.964384	0.975027	0.97083	0.997538	0.998097
995	0.000837668	0.179536	0.488997	0.756454	0.792772	0.964527	0.975121	0.97089	0.997559	0.998117
996	0.000837662	0.179682	0.489353	0.756757	0.793165	0.964669	0.975216	0.970949	0.997581	0.998137
997	0.000837656	0.179829	0.489708	0.75706	0.793558	0.964811	0.97531	0.971008	0.997603	0.998156
998	0.00083765	0.179976	0.490064	0.757362	0.79395	0.964953	0.975403	0.971067	0.997624	0.998175
999	0.000837644	0.180122	0.490419	0.757664	0.794342	0.965093	0.975496	0.971126	0.997645	0.998194
1000	0.000837638	0.180269	0.490775	0.757965	0.794733	0.965234	0.975589	0.971185	0.997666	0.998213
1001	0.000837632	0.180415	0.49113	0.758266	0.795124	0.965374	0.975681	0.971243	0.997687	0.998232
1002	0.000837626	0.180562	0.491485	0.758566	0.795514	0.965513	0.975773	0.971301	0.997707	0.998251
1003	0.00083762	0.180708	0.49184	0.758866	0.795903	0.965652	0.975865	0.971359	0.997728	0.998269
1004	0.000837614	0.180855	0.492195	0.759166	0.796292	0.96579	0.975956	0.971417	0.997748	0.998287
1005	0.000837608	0.181001	0.49255	0.759465	0.796681	0.965928	0.976047	0.971475	0.997768	0.998306
1006	0.000837602	0.181148	0.492904	0.759763	0.797068	0.966066	0.976137	0.971532	0.997788	0.998324
1007	0.000837596	0.181294	0.493259	0.760061	0.797456	0.966203	0.976227	0.97159	0.997808	0.998342
1008	0.00083759	0.18144	0.493614	0.760359	0.797842	0.966339	0.976316	0.971647	0.997827	0.998359
1009	0.000837584	0.181587	0.493968	0.760656	0.798228	0.966475	0.976405	0.971704	0.997847	0.998377
1010	0.000837578	0.181733	0.494322	0.760952	0.798614	0.966611	0.976494	0.971761	0.997866	0.998394
1011	0.000837572	0.181879	0.494676	0.761248	0.798999	0.966746	0.976582	0.971818	0.997885	0.998412
1012	0.000837567	0.182025	0.49503	0.761544	0.799383	0.966881	0.97667	0.971874	0.997904	0.998429
1013	0.000837561	0.182171	0.495384	0.761839	0.799767	0.967015	0.976757	0.97193	0.997923	0.998446
1014	0.000837555	0.182318	0.495738	0.762134	0.80015	0.967148	0.976845	0.971987	0.997941	0.998463
1015	0.000837549	0.182464	0.496092	0.762428	0.800533	0.967282	0.976931	0.972043	0.99796	0.99848
1016	0.000837543	0.18261	0.496445	0.762722	0.800915	0.967414	0.977018	0.972098	0.997978	0.998496
1017	0.000837537	0.182756	0.496799	0.763015	0.801297	0.967547	0.977104	0.972154	0.997996	0.998513
1018	0.000837531	0.182902	0.497152	0.763308	0.801678	0.967678	0.977189	0.97221	0.998014	0.998529
1019	0.000837526	0.183048	0.497506	0.763601	0.802058	0.96781	0.977274	0.972265	0.998032	0.998545
1020	0.00083752	0.183194	0.497859	0.763893	0.802438	0.967941	0.977359	0.97232	0.99805	0.998562
1021	0.000837514	0.18334	0.498212	0.764184	0.802817	0.968071	0.977444	0.972375	0.998067	0.998578
1022	0.000837508	0.183486	0.498565	0.764475	0.803196	0.968201	0.977528	0.97243	0.998085	0.998593
1023	0.000837502	0.183632	0.498917	0.764766	0.803574	0.96833	0.977611	0.972485	0.998102	0.998609
1024	0.000837497	0.183777	0.49927	0.765056	0.803952	0.968459	0.977695	0.972539	0.998119	0.998625
1025	0.000837491	0.183923	0.499623	0.765346	0.804329	0.968588	0.977778	0.972594	0.998136	0.99864
1026	0.000837485	0.184069	0.499975	0.765635	0.804706	0.968716	0.97786	0.972648	0.998153	0.998655
1027	0.000837479	0.184215	0.500327	0.765924	0.805081	0.968844	0.977942	0.972702	0.998169	0.998671
1028	0.000837473	0.184361	0.50068	0.766212	0.805457	0.968971	0.978024	0.972756	0.998186	0.998686
1029	0.000837468	0.184506	0.501032	0.7665	0.805832	0.969098	0.978106	0.972809	0.998202	0.9987
1030	0.000837462	0.184652	0.501384	0.766787	0.806206	0.969224	0.978187	0.972863	0.998219	0.998715
1031	0.000837456	0.184798	0.501736	0.767074	0.806579	0.96935	0.978268	0.972917	0.998235	0.99873
1032	0.000837451	0.184943	0.502087	0.767361	0.806953	0.969476	0.978348	0.97297	0.998251	0.998744
1033	0.000837445	0.185089	0.502439	0.767647	0.807325	0.969601	0.978428	0.973023	0.998266	0.998759
1034	0.000837439	0.185234	0.502791	0.767933	0.807697	0.969725	0.978508	0.973076	0.998282	0.998773
1035	0.000837433	0.18538	0.503142	0.768218	0.808068	0.969849	0.978587	0.973129	0.998298	0.998787
1036	0.000837428	0.185525	0.503493	0.768503	0.808439	0.969973	0.978666	0.973182	0.998313	0.998801
1037	0.000837422	0.185671	0.503844	0.768787	0.808809	0.970096	0.978745	0.973234	0.998328	0.998815
1038	0.000837416	0.185816	0.504195	0.769071	0.809179	0.970219	0.978824	0.973287	0.998344	0.998829
1039	0.000837411	0.185962	0.504546	0.769354	0.809548	0.970342	0.978902	0.973339	0.998359	0.998843
1040	0.000837405	0.186107	0.504897	0.769637	0.809917	0.970464	0.978979	0.973391	0.998373	0.998856
1041	0.0008374	0.186253	0.505248	0.76992	0.810285	0.970585	0.979057	0.973443	0.998388	0.99887
1042	0.000837394	0.186398	0.505598	0.770202	0.810652	0.970706	0.979134	0.973495	0.998403	0.998883
1043	0.000837388	0.186543	0.505949	0.770484	0.811019	0.970827	0.97921	0.973546	0.998417	0.998896
1044	0.000837383	0.186688	0.506299	0.770765	0.811385	0.970947	0.979287	0.973598	0.998432	0.998909
1045	0.000837377	0.186834	0.506649	0.771046	0.811751	0.971067	0.979363	0.973649	0.998446	0.998922
1046	0.000837371	0.186979	0.506999	0.771326	0.812116	0.971187	0.979438	0.973701	0.99846	0.998935
1047	0.000837366	0.187124	0.507349	0.771606	0.812481	0.971306	0.979514	0.973752	0.998474	0.998948
1048	0.00083736	0.187269	0.507699	0.771886	0.812845	0.971424	0.979589	0.973803	0.998488	0.99896
1049	0.000837355	0.187414	0.508048	0.772165	0.813209	0.971542	0.979663	0.973853	0.998502	0.998973
1050	0.000837349	0.18756	0.508398	0.772444	0.813571	0.97166	0.979738	0.973904	0.998515	0.998985
1051	0.000837344	0.187705	0.508747	0.772722	0.813934	0.971778	0.979812	0.973955	0.998529	0.998997
1052	0.000837338	0.18785	0.509097	0.773	0.814296	0.971894	0.979885	0.974005	0.998542	0.999009
1053	0.000837333	0.187995	0.509446	0.773277	0.814657	0.972011	0.979959	0.974055	0.998556	0.999021
1054	0.000837327	0.18814	0.509795	0.773554	0.815018	0.972127	0.980032	0.974106	0.998569	0.999033
1055	0.000837322	0.188285	0.510144	0.773831	0.815378	0.972243	0.980105	0.974156	0.998582	0.999045
1056	0.000837316	0.18843	0.510492	0.774107	0.815737	0.972358	0.980177	0.974206	0.998595	0.999057
1057	0.000837311	0.188575	0.510841	0.774382	0.816096	0.972473	0.980249	0.974255	0.998608	0.999068
1058	0.000837305	0.188719	0.51119	0.774658	0.816455	0.972588	0.980321	0.974305	0.998621	0.99908
1059	0.0008373	0.188864	0.511538	0.774933	0.816812	0.972702	0.980392	0.974354	0.998633	0.999091
1060	0.000837294	0.189009	0.511886	0.775207	0.81717	0.972815	0.980464	0.974404	0.998646	0.999102
1061	0.000837289	0.189154	0.512234	0.775481	0.817526	0.972929	0.980535	0.974453	0.998658	0.999113
1062	0.000837283	0.189299	0.512582	0.775755	0.817883	0.973041	0.980605	0.974502	0.99867	0.999125
1063	0.000837278	0.189443	0.51293	0.776028	0.818238	0.973154	0.980675	0.974551	0.998683	0.999135
1064	0.000837272	0.189588	0.513278	0.776301	0.818593	0.973266	0.980745	0.9746	0.998695	0.999146
1065	0.000837267	0.189733	0.513625	0.776573	0.818948	0.973378	0.980815	0.974649	0.998707	0.999157
1066	0.000837261	0.189878	0.513973	0.776845	0.819302	0.973489	0.980884	0.974697	0.998719	0.999168
1067	0.000837256	0.190022	0.51432	0.777116	0.819655	0.9736	0.980954	0.974746	0.99873	0.999178
1068	0.000837251	0.190167	0.514667	0.777387	0.820008	0.973711	0.981022	0.974794	0.998742	0.999188
1069	0.000837245	0.190311	0.515014	0.777658	0.82036	0.973821	0.981091	0.974842	0.998754	0.999199
1070	0.00083724	0.190456	0.515361	0.777928	0.820712	0.97393	0.981159	0.97489	0.998765	0.999209
1071	0.000837234	0.1906	0.515708	0.778198	0.821063	0.97404	0.981227	0.974938	0.998776	0.999219
1072	0.000837229	0.190745	0.516055	0.778468	0.821413	0.974149	0.981295	0.974986	0.998788	0.999229
1073	0.000837224	0.190889	0.516401	0.778737	0.821763	0.974257	0.981362	0.975034	0.998799	0.999239
1074	0.000837218	0.191034	0.516748	0.779005	0.822113	0.974366	0.981429	0.975081	0.99881	0.999249
1075	0.000837213	0.191178	0.517094	0.779273	0.822462	0.974473	0.981496	0.975129	0.998821	0.999258
1076	0.000837208	0.191323	0.51744	0.779541	0.82281	0.974581	0.981562	0.975176	0.998832	0.999268
1077	0.000837202	0.191467	0.517786	0.779809	0.823158	0.974688	0.981629	0.975223	0.998843	0.999277
1078	0.000837197	0.191611	0.518132	0.780076	0.823505	0.974795	0.981694	0.97527	0.998853	0.999287
1079	0.000837192	0.191756	0.518477	0.780342	0.823852	0.974901	0.98176	0.975317	0.998864	0.999296
1080	0.000837186	0.1919	0.518823	0.780608	0.824198	0.975007	0.981825	0.975364	0.998874	0.999305
1081	0.000837181	0.192044	0.519168	0.780874	0.824543	0.975112	0.981891	0.975411	0.998885	0.999314
1082	0.000837176	0.192188	0.519514	0.781139	0.824888	0.975217	0.981955	0.975458	0.998895	0.999323
1083	0.00083717	0.192333	0.519859	0.781404	0.825233	0.975322	0.98202	0.975504	0.998905	0.999332
1084	0.000837165	0.192477	0.520204	0.781669	0.825576	0.975427	0.982084	0.97555	0.998915	0.999341
1085	0.00083716	0.192621	0.520549	0.781933	0.82592	0.975531	0.982148	0.975597	0.998926	0.99935
1086	0.000837155	0.192765	0.520893	0.782197	0.826262	0.975634	0.982212	0.975643	0.998936	0.999358
1087	0.000837149	0.192909	0.521238	0.78246	0.826605	0.975738	0.982275	0.975689	0.998945	0.999367
1088	0.000837144	0.193053	0.521582	0.782723	0.826946	0.975841	0.982339	0.975735	0.998955	0.999375
1089	0.000837139	0.193197	0.521926	0.782985	0.827287	0.975943	0.982401	0.975781	0.998965	0.999384
1090	0.000837134	0.193341	0.522271	0.783248	0.827628	0.976046	0.982464	0.975826	0.998974	0.999392
1091	0.000837128	0.193485	0.522615	0.783509	0.827968	0.976148	0.982527	0.975872	0.998984	0.9994
1092	0.000837123	0.193629	0.522958	0.783771	0.828307	0.976249	0.982589	0.975917	0.998993	0.999408
1093	0.000837118	0.193773	0.523302	0.784032	0.828646	0.97635	0.982651	0.975963	0.999003	0.999416
1094	0.000837113	0.193917	0.523646	0.784292	0.828984	0.976451	0.982712	0.976008	0.999012	0.999424
1095	0.000837108	0.194061	0.523989	0.784552	0.829322	0.976551	0.982774	0.976053	0.999021	0.999432
1096	0.000837102	0.194205	0.524332	0.784812	0.829659	0.976651	0.982835	0.976098	0.99903	0.99944
1097	0.000837097	0.194349	0.524676	0.785071	0.829996	0.976751	0.982896	0.976143	0.999039	0.999448
1098	0.000837092	0.194492	0.525019	0.78533	0.830332	0.976851	0.982956	0.976188	0.999048	0.999455
1099	0.000837087	0.194636	0.525361	0.785589	0.830668	0.97695	0.983017	0.976233	0.999057	0.999463
1100	0.000837082	0.19478	0.525704	0.785847	0.831003	0.977048	0.983077	0.976277	0.999066	0.99947
1101	0.000837077	0.194924	0.526047	0.786104	0.831337	0.977147	0.983136	0.976322	0.999075	0.999477
1102	0.000837071	0.195067	0.526389	0.786362	0.831671	0.977245	0.983196	0.976366	0.999083	0.999485
1103	0.000837066	0.195211	0.526731	0.786619	0.832004	0.977342	0.983255	0.97641	0.999092	0.999492
1104	0.000837061	0.195355	0.527073	0.786875	0.832337	0.977439	0.983315	0.976455	0.999101	0.999499
1105	0.000837056	0.195498	0.527415	0.787131	0.832669	0.977536	0.983373	0.976499	0.999109	0.999506
1106	0.000837051	0.195642	0.527757	0.787387	0.833001	0.977633	0.983432	0.976543	0.999117	0.999513
1107	0.000837046	0.195785	0.528099	0.787643	0.833332	0.977729	0.98349	0.976586	0.999126	0.99952
1108	0.000837041	0.195929	0.52844	0.787897	0.833663	0.977825	0.983549	0.97663	0.999134	0.999527
1109	0.000837036	0.196073	0.528782	0.788152	0.833993	0.977921	0.983607	0.976674	0.999142	0.999533
1110	0.000837031	0.196216	0.529123	0.788406	0.834322	0.978016	0.983664	0.976717	0.99915	0.99954
1111	0.000837026	0.196359	0.529464	0.78866	0.834651	0.978111	0.983722	0.976761	0.999158	0.999546
1112	0.000837021	0.196503	0.529805	0.788913	0.83498	0.978205	0.983779	0.976804	0.999166	0.999553
1113	0.000837015	0.196646	0.530146	0.789166	0.835308	0.978299	0.983836	0.976847	0.999174	0.999559
1114	0.00083701	0.19679	0.530486	0.789419	0.835635	0.978393	0.983892	0.97689	0.999181	0.999566
1115	0.000837005	0.196933	0.530827	0.789671	0.835962	0.978487	0.983949	0.976934	0.999189	0.999572
1116	0.000837	0.197076	0.531167	0.789923	0.836288	0.97858	0.984005	0.976976	0.999197	0.999578
1117	0.000836995	0.19722	0.531507	0.790175	0.836614	0.978673	0.984061	0.977019	0.999204	0.999584
1118	0.00083699	0.197363	0.531847	0.790426	0.836939	0.978765	0.984117	0.977062	0.999212	0.99959
1119	0.000836985	0.197506	0.532187	0.790676	0.837263	0.978858	0.984173	0.977105	0.999219	0.999596
1120	0.00083698	0.197649	0.532527	0.790927	0.837587	0.978949	0.984228	0.977147	0.999227	0.999602
1121	0.000836975	0.197793	0.532866	0.791177	0.837911	0.979041	0.984283	0.97719	0.999234	0.999608
1122	0.00083697	0.197936	0.533206	0.791426	0.838234	0.979132	0.984338	0.977232	0.999241	0.999614
1123	0.000836965	0.198079	0.533545	0.791675	0.838556	0.979223	0.984393	0.977274	0.999248	0.999619
1124	0.00083696	0.198222	0.533884	0.791924	0.838878	0.979314	0.984447	0.977316	0.999255	0.999625
1125	0.000836955	0.198365	0.534223	0.792172	0.839199	0.979404	0.984501	0.977358	0.999263	0.99963
1126	0.00083695	0.198508	0.534562	0.79242	0.83952	0.979494	0.984556	0.9774	0.999269	0.999636
1127	0.000836945	0.198651	0.5349	0.792668	0.83984	0.979583	0.984609	0.977442	0.999276	0.999641
1128	0.000836941	0.198794	0.535239	0.792915	0.84016	0.979672	0.984663	0.977484	0.999283	0.999647
1129	0.000836936	0.198937	0.535577	0.793162	0.840479	0.979761	0.984716	0.977526	0.99929	0.999652
1130	0.000836931	0.19908	0.535915	0.793408	0.840798	0.97985	0.984769	0.977567	0.999297	0.999657
1131	0.000836926	0.199223	0.536253	0.793655	0.841116	0.979938	0.984822	0.977609	0.999303	0.999662
1132	0.000836921	0.199366	0.536591	0.7939	0.841434	0.980026	0.984875	0.97765	0.99931	0.999667
1133	0.000836916	0.199509	0.536929	0.794146	0.841751	0.980114	0.984928	0.977691	0.999317	0.999672
1134	0.000836911	0.199652	0.537266	0.79439	0.842067	0.980201	0.98498	0.977733	0.999323	0.999677
1135	0.000836906	0.199795	0.537604	0.794635	0.842383	0.980288	0.985032	0.977774	0.99933	0.999682
1136	0.000836901	0.199938	0.537941	0.794879	0.842698	0.980375	0.985084	0.977815	0.999336	0.999687
1137	0.000836896	0.200081	0.538278	0.795123	0.843013	0.980461	0.985136	0.977856	0.999342	0.999692
1138	0.000836892	0.200223	0.538615	0.795366	0.843328	0.980548	0.985187	0.977897	0.999349	0.999697
1139	0.000836887	0.200366	0.538952	0.795609	0.843641	0.980633	0.985238	0.977937	0.999355	0.999701
1140	0.000836882	0.200509	0.539288	0.795852	0.843955	0.980719	0.98529	0.977978	0.999361	0.999706
1141	0.000836877	0.200652	0.539625	0.796094	0.844267	0.980804	0.98534	0.978019	0.999367	0.99971
1142	0.000836872	0.200794	0.539961	0.796336	0.84458	0.980889	0.985391	0.978059	0.999373	0.999715
1143	0.000836867	0.200937	0.540297	0.796578	0.844891	0.980973	0.985442	0.978099	0.999379	0.999719
1144	0.000836862	0.201079	0.540633	0.796819	0.845202	0.981058	0.985492	0.97814	0.999385	0.999724
1145	0.000836858	0.201222	0.540969	0.79706	0.845513	0.981142	0.985542	0.97818	0.999391	0.999728
1146	0.000836853	0.201365	0.541304	0.7973	0.845823	0.981225	0.985592	0.97822	0.999397	0.999732
1147	0.000836848	0.201507	0.54164	0.79754	0.846133	0.981308	0.985641	0.97826	0.999402	0.999736
1148	0.000836843	0.20165	0.541975	0.79778	0.846442	0.981391	0.985691	0.9783	0.999408	0.999741
1149	0.000836838	0.201792	0.54231	0.798019	0.84675	0.981474	0.98574	0.97834	0.999414	0.999745
1150	0.000836834	0.201935	0.542645	0.798258	0.847058	0.981557	0.985789	0.97838	0.999419	0.999749
1151	0.000836829	0.202077	0.54298	0.798496	0.847365	0.981639	0.985838	0.978419	0.999425	0.999753
1152	0.000836824	0.20222	0.543315	0.798735	0.847672	0.981721	0.985887	0.978459	0.999431	0.999757
1153	0.000836819	0.202362	0.543649	0.798972	0.847979	0.981802	0.985935	0.978499	0.999436	0.99976
1154	0.000836815	0.202504	0.543984	0.79921	0.848284	0.981883	0.985984	0.978538	0.999441	0.999764
1155	0.00083681	0.202647	0.544318	0.799447	0.84859	0.981964	0.986032	0.978577	0.999447	0.999768
1156	0.000836805	0.202789	0.544652	0.799683	0.848895	0.982045	0.98608	0.978617	0.999452	0.999772
1157	0.0008368	0.202931	0.544986	0.79992	0.849199	0.982125	0.986128	0.978656	0.999457	0.999775
1158	0.000836796	0.203074	0.545319	0.800156	0.849502	0.982205	0.986175	0.978695	0.999463	0.999779
1159	0.000836791	0.203216	0.545653	0.800391	0.849806	0.982285	0.986223	0.978734	0.999468	0.999783
1160	0.000836786	0.203358	0.545986	0.800626	0.850108	0.982365	0.98627	0.978773	0.999473	0.999786
1161	0.000836781	0.2035	0.546319	0.800861	0.85041	0.982444	0.986317	0.978812	0.999478	0.99979
1162	0.000836777	0.203643	0.546652	0.801096	0.850712	0.982523	0.986364	0.97885	0.999483	0.999793
1163	0.000836772	0.203785	0.546985	0.80133	0.851013	0.982601	0.98641	0.978889	0.999488	0.999796
1164	0.000836767	0.203927	0.547318	0.801563	0.851314	0.98268	0.986457	0.978928	0.999493	0.9998
1165	0.000836763	0.204069	0.54765	0.801797	0.851614	0.982758	0.986503	0.978966	0.999498	0.999803
1166	0.000836758	0.204211	0.547983	0.80203	0.851913	0.982835	0.986549	0.979005	0.999503	0.999806
1167	0.000836753	0.204353	0.548315	0.802262	0.852212	0.982913	0.986595	0.979043	0.999508	0.99981
1168	0.000836749	0.204495	0.548647	0.802495	0.852511	0.98299	0.986641	0.979081	0.999512	0.999813
1169	0.000836744	0.204637	0.548979	0.802726	0.852809	0.983067	0.986687	0.97912	0.999517	0.999816
1170	0.000836739	0.204779	0.549311	0.802958	0.853106	0.983143	0.986732	0.979158	0.999522	0.999819
1171	0.000836735	0.204921	0.549642	0.803189	0.853403	0.98322	0.986777	0.979196	0.999526	0.999822
1172	0.00083673	0.205063	0.549973	0.80342	0.8537	0.983296	0.986822	0.979234	0.999531	0.999825
1173	0.000836726	0.205205	0.550305	0.80365	0.853996	0.983372	0.986867	0.979272	0.999536	0.999828
1174	0.000836721	0.205347	0.550636	0.80388	0.854291	0.983447	0.986912	0.97931	0.99954	0.999831
1175	0.000836716	0.205489	0.550966	0.80411	0.854586	0.983522	0.986956	0.979347	0.999545	0.999834
1176	0.000836712	0.205631	0.551297	0.804339	0.85488	0.983597	0.987001	0.979385	0.999549	0.999836
1177	0.000836707	0.205773	0.551628	0.804568	0.855174	0.983672	0.987045	0.979423	0.999553	0.999839
1178	0.000836702	0.205915	0.551958	0.804797	0.855467	0.983746	0.987089	0.97946	0.999558	0.999842
1179	0.000836698	0.206056	0.552288	0.805025	0.85576	0.98382	0.987133	0.979498	0.999562	0.999845
1180	0.000836693	0.206198	0.552618	0.805253	0.856052	0.983894	0.987177	0.979535	0.999566	0.999847
1181	0.000836689	0.20634	0.552948	0.80548	0.856344	0.983968	0.98722	0.979572	0.999571	0.99985
1182	0.000836684	0.206482	0.553278	0.805707	0.856635	0.984041	0.987264	0.979609	0.999575	0.999852
1183	0.00083668	0.206623	0.553607	0.805934	0.856926	0.984114	0.987307	0.979647	0.999579	0.999855
1184	0.000836675	0.206765	0.553936	0.806161	0.857216	0.984187	0.98735	0.979684	0.999583	0.999857
1185	0.000836671	0.206907	0.554266	0.806387	0.857506	0.984259	0.987393	0.979721	0.999587	0.99986
1186	0.000836666	0.207048	0.554595	0.806612	0.857795	0.984331	0.987436	0.979758	0.999591	0.999862
1187	0.000836661	0.20719	0.554923	0.806838	0.858084	0.984403	0.987478	0.979794	0.999595	0.999865
1188	0.000836657	0.207331	0.555252	0.807063	0.858372	0.984475	0.987521	0.979831	0.999599	0.999867
1189	0.000836652	0.207473	0.555581	0.807287	0.85866	0.984546	0.987563	0.979868	0.999603	0.999869
1190	0.000836648	0.207615	0.555909	0.807512	0.858947	0.984618	0.987605	0.979905	0.999607	0.999872
1191	0.000836643	0.207756	0.556237	0.807736	0.859234	0.984688	0.987647	0.979941	0.999611	0.999874
1192	0.000836639	0.207898	0.556565	0.807959	0.85952	0.984759	0.987689	0.979978	0.999615	0.999876
1193	0.000836634	0.208039	0.556893	0.808182	0.859806	0.984829	0.98773	0.980014	0.999619	0.999878
1194	0.00083663	0.20818	0.55722	0.808405	0.860091	0.9849	0.987772	0.98005	0.999622	0.999881
1195	0.000836625	0.208322	0.557548	0.808628	0.860376	0.984969	0.987813	0.980087	0.999626	0.999883
1196	0.000836621	0.208463	0.557875	0.80885	0.86066	0.985039	0.987854	0.980123	0.99963	0.999885
1197	0.000836616	0.208605	0.558202	0.809072	0.860943	0.985108	0.987895	0.980159	0.999633	0.999887
1198	0.000836612	0.208746	0.558529	0.809293	0.861226	0.985177	0.987936	0.980195	0.999637	0.999889
1199	0.000836608	0.208887	0.558856	0.809514	0.861509	0.985246	0.987977	0.980231	0.999641	0.999891
1200	0.000836603	0.209029	0.559182	0.809735	0.861791	0.985315	0.988017	0.980267	0.999644	0.999893
1201	0.000836599	0.20917	0.559509	0.809955	0.862073	0.985383	0.988058	0.980303	0.999648	0.999895
1202	0.000836594	0.209311	0.559835	0.810175	0.862354	0.985451	0.988098	0.980339	0.999651	0.999897
1203	0.00083659	0.209452	0.560161	0.810395	0.862635	0.985519	0.988138	0.980374	0.999655	0.999898
1204	0.000836585	0.209594	0.560487	0.810614	0.862915	0.985586	0.988178	0.98041	0.999658	0.9999
1205	0.000836581	0.209735	0.560813	0.810833	0.863194	0.985653	0.988218	0.980445	0.999662	0.999902
1206	0.000836577	0.209876	0.561138	0.811052	0.863474	0.98572	0.988257	0.980481	0.999665	0.999904
1207	0.000836572	0.210017	0.561463	0.81127	0.863752	0.985787	0.988297	0.980516	0.999668	0.999906
1208	0.000836568	0.210158	0.561789	0.811488	0.86403	0.985854	0.988336	0.980552	0.999672	0.999907
1209	0.000836563	0.210299	0.562114	0.811706	0.864308	0.98592	0.988376	0.980587	0.999675	0.999909
1210	0.000836559	0.21044	0.562438	0.811923	0.864585	0.985986	0.988415	0.980622	0.999678	0.999911
1211	0.000836555	0.210582	0.562763	0.81214	0.864862	0.986052	0.988454	0.980657	0.999681	0.999912
1212	0.00083655	0.210723	0.563088	0.812356	0.865138	0.986117	0.988492	0.980693	0.999684	0.999914
1213	0.000836546	0.210864	0.563412	0.812573	0.865414	0.986182	0.988531	0.980728	0.999688	0.999916
1214	0.000836541	0.211005	0.563736	0.812788	0.865689	0.986247	0.98857	0.980763	0.999691	0.999917
1215	0.000836537	0.211146	0.56406	0.813004	0.865963	0.986312	0.988608	0.980798	0.999694	0.999919
1216	0.000836533	0.211286	0.564384	0.813219	0.866238	0.986376	0.988646	0.980832	0.999697	0.99992
1217	0.000836528	0.211427	0.564707	0.813434	0.866511	0.986441	0.988684	0.980867	0.9997	0.999922
1218	0.000836524	0.211568	0.565031	0.813648	0.866784	0.986505	0.988722	0.980902	0.999703	0.999923
1219	0.00083652	0.211709	0.565354	0.813863	0.867057	0.986569	0.98876	0.980937	0.999706	0.999925
1220	0.000836515	0.21185	0.565677	0.814076	0.867329	0.986632	0.988798	0.980971	0.999709	0.999926
1221	0.000836511	0.211991	0.566	0.81429	0.867601	0.986695	0.988835	0.981006	0.999712	0.999928
1222	0.000836507	0.212132	0.566322	0.814503	0.867872	0.986758	0.988873	0.98104	0.999715	0.999929
1223	0.000836502	0.212273	0.566645	0.814716	0.868143	0.986821	0.98891	0.981074	0.999718	0.99993
1224	0.000836498	0.212413	0.566967	0.814928	0.868413	0.986884	0.988947	0.981109	0.99972	0.999932
1225	0.000836494	0.212554	0.567289	0.81514	0.868683	0.986946	0.988984	0.981143	0.999723	0.999933
1226	0.00083649	0.212695	0.567611	0.815352	0.868952	0.987008	0.989021	0.981177	0.999726	0.999934
1227	0.000836485	0.212835	0.567933	0.815563	0.869221	0.98707	0.989058	0.981211	0.999729	0.999935
1228	0.000836481	0.212976	0.568255	0.815775	0.869489	0.987132	0.989094	0.981245	0.999732	0.999937
1229	0.000836477	0.213117	0.568576	0.815985	0.869757	0.987193	0.989131	0.98128	0.999734	0.999938
1230	0.000836473	0.213257	0.568898	0.816196	0.870025	0.987254	0.989167	0.981313	0.999737	0.999939
1231	0.000836468	0.213398	0.569219	0.816406	0.870291	0.987315	0.989203	0.981347	0.99974	0.99994
1232	0.000836464	0.213539	0.569539	0.816616	0.870558	0.987376	0.989239	0.981381	0.999742	0.999941
1233	0.00083646	0.213679	0.56986	0.816825	0.870824	0.987436	0.989275	0.981415	0.999745	0.999943
1234	0.000836456	0.21382	0.570181	0.817034	0.871089	0.987496	0.989311	0.981449	0.999747	0.999944
1235	0.000836451	0.21396	0.570501	0.817243	0.871354	0.987556	0.989347	0.981482	0.99975	0.999945
1236	0.000836447	0.214101	0.570821	0.817451	0.871619	0.987616	0.989382	0.981516	0.999753	0.999946
1237	0.000836443	0.214241	0.571141	0.817659	0.871883	0.987676	0.989418	0.981549	0.999755	0.999947
1238	0.000836439	0.214382	0.571461	0.817867	0.872146	0.987735	0.989453	0.981583	0.999758	0.999948
1239	0.000836434	0.214522	0.571781	0.818074	0.872409	0.987794	0.989488	0.981616	0.99976	0.999949
1240	0.00083643	0.214663	0.5721	0.818282	0.872672	0.987853	0.989523	0.98165	0.999762	0.99995
1241	0.000836426	0.214803	0.572419	0.818488	0.872934	0.987911	0.989558	0.981683	0.999765	0.999951
1242	0.000836422	0.214944	0.572738	0.818695	0.873195	0.98797	0.989593	0.981716	0.999767	0.999952
1243	0.000836418	0.215084	0.573057	0.818901	0.873456	0.988028	0.989628	0.981749	0.99977	0.999953
1244	0.000836413	0.215224	0.573376	0.819107	0.873717	0.988086	0.989662	0.981783	0.999772	0.999954
1245	0.000836409	0.215365	0.573695	0.819312	0.873977	0.988143	0.989697	0.981816	0.999774	0.999955
1246	0.000836405	0.215505	0.574013	0.819517	0.874237	0.988201	0.989731	0.981849	0.999777	0.999956
1247	0.000836401	0.215645	0.574331	0.819722	0.874496	0.988258	0.989765	0.981882	0.999779	0.999957
1248	0.000836397	0.215785	0.574649	0.819926	0.874755	0.988315	0.989799	0.981914	0.999781	0.999958
1249	0.000836393	0.215926	0.574967	0.820131	0.875013	0.988372	0.989833	0.981947	0.999783	0.999958
1250	0.000836389	0.216066	0.575284	0.820334	0.875271	0.988429	0.989867	0.98198	0.999786	0.999959
1251	0.000836384	0.216206	0.575602	0.820538	0.875528	0.988485	0.989901	0.982013	0.999788	0.99996
1252	0.00083638	0.216346	0.575919	0.820741	0.875785	0.988541	0.989935	0.982045	0.99979	0.999961
1253	0.000836376	0.216486	0.576236	0.820944	0.876041	0.988597	0.989968	0.982078	0.999792	0.999962
1254	0.000836372	0.216627	0.576553	0.821147	0.876297	0.988653	0.990001	0.982111	0.999794	0.999962
1255	0.000836368	0.216767	0.57687	0.821349	0.876553	0.988708	0.990035	0.982143	0.999796	0.999963
1256	0.000836364	0.216907	0.577186	0.821551	0.876808	0.988763	0.990068	0.982175	0.999799	0.999964
1257	0.00083636	0.217047	0.577503	0.821752	0.877062	0.988818	0.990101	0.982208	0.999801	0.999965
1258	0.000836356	0.217187	0.577819	0.821954	0.877316	0.988873	0.990134	0.98224	0.999803	0.999965
1259	0.000836351	0.217327	0.578135	0.822155	0.87757	0.988928	0.990167	0.982272	0.999805	0.999966
1260	0.000836347	0.217467	0.57845	0.822355	0.877823	0.988982	0.990199	0.982305	0.999807	0.999967
1261	0.000836343	0.217607	0.578766	0.822556	0.878076	0.989036	0.990232	0.982337	0.999809	0.999968
1262	0.000836339	0.217747	0.579081	0.822756	0.878328	0.98909	0.990264	0.982369	0.999811	0.999968
1263	0.000836335	0.217887	0.579397	0.822955	0.878579	0.989144	0.990297	0.982401	0.999813	0.999969
1264	0.000836331	0.218027	0.579712	0.823155	0.878831	0.989198	0.990329	0.982433	0.999815	0.99997
1265	0.000836327	0.218167	0.580027	0.823354	0.879081	0.989251	0.990361	0.982465	0.999817	0.99997
1266	0.000836323	0.218306	0.580341	0.823553	0.879332	0.989304	0.990393	0.982497	0.999819	0.999971
1267	0.000836319	0.218446	0.580656	0.823751	0.879582	0.989357	0.990425	0.982529	0.99982	0.999971
1268	0.000836315	0.218586	0.58097	0.823949	0.879831	0.98941	0.990457	0.98256	0.999822	0.999972
1269	0.000836311	0.218726	0.581284	0.824147	0.88008	0.989462	0.990488	0.982592	0.999824	0.999973
1270	0.000836307	0.218866	0.581598	0.824345	0.880329	0.989515	0.99052	0.982624	0.999826	0.999973
1271	0.000836303	0.219006	0.581912	0.824542	0.880577	0.989567	0.990551	0.982655	0.999828	0.999974
1272	0.000836299	0.219145	0.582225	0.824739	0.880824	0.989618	0.990583	0.982687	0.99983	0.999974
1273	0.000836295	0.219285	0.582539	0.824935	0.881071	0.98967	0.990614	0.982719	0.999831	0.999975
1274	0.000836291	0.219425	0.582852	0.825132	0.881318	0.989722	0.990645	0.98275	0.999833	0.999975
1275	0.000836287	0.219564	0.583165	0.825328	0.881564	0.989773	0.990676	0.982781	0.999835	0.999976
1276	0.000836283	0.219704	0.583477	0.825523	0.88181	0.989824	0.990707	0.982813	0.999837	0.999976
1277	0.000836279	0.219844	0.58379	0.825719	0.882055	0.989875	0.990738	0.982844	0.999838	0.999977
1278	0.000836275	0.219983	0.584102	0.825914	0.8823	0.989925	0.990768	0.982875	0.99984	0.999977
1279	0.000836271	0.220123	0.584415	0.826109	0.882544	0.989976	0.990799	0.982907	0.999842	0.999978
1280	0.000836267	0.220263	0.584727	0.826303	0.882788	0.990026	0.990829	0.982938	0.999843	0.999978
1281	0.000836263	0.220402	0.585039	0.826497	0.883032	0.990076	0.99086	0.982969	0.999845	0.999979
1282	0.000836259	0.220542	0.58535	0.826691	0.883275	0.990126	0.99089	0.983	0.999847	0.999979
1283	0.000836255	0.220681	0.585662	0.826885	0.883517	0.990175	0.99092	0.983031	0.999848	0.99998
1284	0.000836251	0.220821	0.585973	0.827078	0.88376	0.990225	0.99095	0.983062	0.99985	0.99998
1285	0.000836247	0.22096	0.586284	0.827271	0.884001	0.990274	0.99098	0.983093	0.999851	0.999981
1286	0.000836243	0.2211	0.586595	0.827464	0.884243	0.990323	0.99101	0.983124	0.999853	0.999981
1287	0.000836239	0.221239	0.586906	0.827656	0.884483	0.990372	0.99104	0.983154	0.999855	0.999982
1288	0.000836235	0.221379	0.587216	0.827849	0.884724	0.99042	0.99107	0.983185	0.999856	0.999982
1289	0.000836231	0.221518	0.587527	0.82804	0.884964	0.990469	0.991099	0.983216	0.999858	0.999982
1290	0.000836227	0.221657	0.587837	0.828232	0.885203	0.990517	0.991129	0.983246	0.999859	0.999983
1291	0.000836223	0.221797	0.588147	0.828423	0.885442	0.990565	0.991158	0.983277	0.999861	0.999983
1292	0.00083622	0.221936	0.588456	0.828614	0.885681	0.990613	0.991187	0.983308	0.999862	0.999984
1293	0.000836216	0.222075	0.588766	0.828805	0.885919	0.990661	0.991216	0.983338	0.999864	0.999984
1294	0.000836212	0.222215	0.589075	0.828995	0.886156	0.990708	0.991246	0.983369	0.999865	0.999984
1295	0.000836208	0.222354	0.589385	0.829185	0.886394	0.990755	0.991274	0.983399	0.999866	0.999985
1296	0.000836204	0.222493	0.589694	0.829375	0.88663	0.990802	0.991303	0.983429	0.999868	0.999985
1297	0.0008362	0.222633	0.590003	0.829565	0.886867	0.990849	0.991332	0.98346	0.999869	0.999985
1298	0.000836196	0.222772	0.590311	0.829754	0.887103	0.990896	0.991361	0.98349	0.999871	0.999986
1299	0.000836192	0.222911	0.59062	0.829943	0.887338	0.990942	0.991389	0.98352	0.999872	0.999986
1300	0.000836188	0.22305	0.590928	0.830132	0.887573	0.990989	0.991418	0.98355	0.999873	0.999986
1301	0.000836185	0.223189	0.591236	0.83032	0.887808	0.991035	0.991446	0.98358	0.999875	0.999987
1302	0.000836181	0.223329	0.591544	0.830508	0.888042	0.991081	0.991475	0.983611	0.999876	0.999987
1303	0.000836177	0.223468	0.591851	0.830696	0.888276	0.991126	0.991503	0.983641	0.999877	0.999987
1304	0.000836173	0.223607	0.592159	0.830884	0.888509	0.991172	0.991531	0.983671	0.999879	0.999987
1305	0.000836169	0.223746	0.592466	0.831071	0.888742	0.991217	0.991559	0.983701	0.99988	0.999988
1306	0.000836165	0.223885	0.592773	0.831258	0.888974	0.991262	0.991587	0.98373	0.999881	0.999988
1307	0.000836162	0.224024	0.59308	0.831445	0.889206	0.991307	0.991615	0.98376	0.999883	0.999988
1308	0.000836158	0.224163	0.593387	0.831631	0.889438	0.991352	0.991642	0.98379	0.999884	0.999989
1309	0.000836154	0.224302	0.593694	0.831817	0.889669	0.991397	0.99167	0.98382	0.999885	0.999989
1310	0.00083615	0.224441	0.594	0.832003	0.889899	0.991441	0.991697	0.98385	0.999886	0.999989
1311	0.000836146	0.22458	0.594306	0.832189	0.89013	0.991485	0.991725	0.983879	0.999888	0.999989
1312	0.000836142	0.224719	0.594612	0.832374	0.890359	0.99153	0.991752	0.983909	0.999889	0.99999
1313	0.000836139	0.224858	0.594918	0.832559	0.890589	0.991573	0.99178	0.983938	0.99989	0.99999
1314	0.000836135	0.224997	0.595223	0.832744	0.890818	0.991617	0.991807	0.983968	0.999891	0.99999
1315	0.000836131	0.225136	0.595529	0.832929	0.891046	0.991661	0.991834	0.983997	0.999892	0.99999
1316	0.000836127	0.225275	0.595834	0.833113	0.891274	0.991704	0.991861	0.984027	0.999893	0.999991
1317	0.000836124	0.225413	0.596139	0.833297	0.891502	0.991747	0.991888	0.984056	0.999895	0.999991
1318	0.00083612	0.225552	0.596444	0.833481	0.891729	0.99179	0.991914	0.984086	0.999896	0.999991
1319	0.000836116	0.225691	0.596748	0.833664	0.891956	0.991833	0.991941	0.984115	0.999897	0.999991
1320	0.000836112	0.22583	0.597053	0.833847	0.892182	0.991875	0.991968	0.984144	0.999898	0.999991
1321	0.000836108	0.225969	0.597357	0.83403	0.892408	0.991918	0.991994	0.984173	0.999899	0.999992
1322	0.000836105	0.226107	0.597661	0.834213	0.892634	0.99196	0.992021	0.984202	0.9999	0.999992
1323	0.000836101	0.226246	0.597965	0.834395	0.892859	0.992002	0.992047	0.984232	0.999901	0.999992
1324	0.000836097	0.226385	0.598269	0.834577	0.893084	0.992044	0.992073	0.984261	0.999902	0.999992
1325	0.000836093	0.226524	0.598572	0.834759	0.893308	0.992086	0.9921	0.98429	0.999903	0.999992
1326	0.00083609	0.226662	0.598875	0.834941	0.893532	0.992127	0.992126	0.984319	0.999905	0.999993
1327	0.000836086	0.226801	0.599178	0.835122	0.893755	0.992169	0.992152	0.984348	0.999906	0.999993
1328	0.000836082	0.22694	0.599481	0.835303	0.893978	0.99221	0.992178	0.984377	0.999907	0.999993
1329	0.000836079	0.227078	0.599784	0.835484	0.894201	0.992251	0.992204	0.984405	0.999908	0.999993
1330	0.000836075	0.227217	0.600087	0.835665	0.894423	0.992292	0.992229	0.984434	0.999909	0.999993
1331	0.000836071	0.227356	0.600389	0.835845	0.894644	0.992332	0.992255	0.984463	0.99991	0.999993
1332	0.000836067	0.227494	0.600691	0.836025	0.894866	0.992373	0.992281	0.984492	0.999911	0.999994
1333	0.000836064	0.227633	0.600993	0.836205	0.895087	0.992413	0.992306	0.98452	0.999912	0.999994
1334	0.00083606	0.227771	0.601295	0.836385	0.895307	0.992453	0.992332	0.984549	0.999913	0.999994
1335	0.000836056	0.22791	0.601596	0.836564	0.895527	0.992493	0.992357	0.984578	0.999914	0.999994
1336	0.000836053	0.228048	0.601897	0.836743	0.895747	0.992533	0.992382	0.984606	0.999914	0.999994
1337	0.000836049	0.228187	0.602199	0.836922	0.895966	0.992573	0.992407	0.984635	0.999915	0.999994
1338	0.000836045	0.228325	0.6025	0.837101	0.896185	0.992612	0.992432	0.984663	0.999916	0.999994
1339	0.000836042	0.228464	0.6028	0.837279	0.896403	0.992651	0.992457	0.984692	0.999917	0.999995
1340	0.000836038	0.228602	0.603101	0.837457	0.896621	0.99269	0.992482	0.98472	0.999918	0.999995
1341	0.000836034	0.22874	0.603401	0.837635	0.896839	0.992729	0.992507	0.984748	0.999919	0.999995
1342	0.000836031	0.228879	0.603701	0.837812	0.897056	0.992768	0.992532	0.984777	0.99992	0.999995
1343	0.000836027	0.229017	0.604001	0.83799	0.897273	0.992807	0.992557	0.984805	0.999921	0.999995
1344	0.000836023	0.229155	0.604301	0.838167	0.897489	0.992845	0.992581	0.984833	0.999922	0.999995
1345	0.00083602	0.229294	0.604601	0.838344	0.897705	0.992883	0.992606	0.984862	0.999923	0.999995
1346	0.000836016	0.229432	0.6049	0.83852	0.89792	0.992922	0.99263	0.98489	0.999923	0.999995
1347	0.000836012	0.22957	0.605199	0.838697	0.898135	0.99296	0.992655	0.984918	0.999924	0.999996
1348	0.000836009	0.229709	0.605498	0.838873	0.89835	0.992997	0.992679	0.984946	0.999925	0.999996
1349	0.000836005	0.229847	0.605797	0.839049	0.898564	0.993035	0.992703	0.984974	0.999926	0.999996
1350	0.000836002	0.229985	0.606096	0.839224	0.898778	0.993072	0.992727	0.985002	0.999927	0.999996
1351	0.000835998	0.230123	0.606394	0.8394	0.898992	0.99311	0.992751	0.98503	0.999928	0.999996
1352	0.000835994	0.230262	0.606692	0.839575	0.899205	0.993147	0.992775	0.985058	0.999928	0.999996
1353	0.000835991	0.2304	0.606991	0.83975	0.899418	0.993184	0.992799	0.985086	0.999929	0.999996
1354	0.000835987	0.230538	0.607288	0.839925	0.89963	0.993221	0.992823	0.985113	0.99993	0.999996
1355	0.000835984	0.230676	0.607586	0.840099	0.899842	0.993257	0.992847	0.985141	0.999931	0.999996
1356	0.00083598	0.230814	0.607883	0.840273	0.900053	0.993294	0.99287	0.985169	0.999932	0.999996
1357	0.000835976	0.230952	0.608181	0.840447	0.900264	0.99333	0.992894	0.985197	0.999932	0.999997
1358	0.000835973	0.23109	0.608478	0.840621	0.900475	0.993366	0.992917	0.985224	0.999933	0.999997
1359	0.000835969	0.231228	0.608775	0.840795	0.900685	0.993402	0.992941	0.985252	0.999934	0.999997
1360	0.000835966	0.231366	0.609071	0.840968	0.900895	0.993438	0.992964	0.98528	0.999935	0.999997
1361	0.000835962	0.231504	0.609368	0.841141	0.901104	0.993474	0.992987	0.985307	0.999935	0.999997
1362	0.000835959	0.231643	0.609664	0.841314	0.901313	0.993509	0.993011	0.985335	0.999936	0.999997
1363	0.000835955	0.23178	0.60996	0.841487	0.901522	0.993545	0.993034	0.985362	0.999937	0.999997
1364	0.000835952	0.231918	0.610256	0.841659	0.90173	0.99358	0.993057	0.98539	0.999937	0.999997
1365	0.000835948	0.232056	0.610552	0.841831	0.901938	0.993615	0.99308	0.985417	0.999938	0.999997
1366	0.000835944	0.232194	0.610847	0.842003	0.902146	0.99365	0.993103	0.985444	0.999939	0.999997
1367	0.000835941	0.232332	0.611143	0.842175	0.902353	0.993685	0.993126	0.985472	0.99994	0.999997
1368	0.000835937	0.23247	0.611438	0.842346	0.902559	0.993719	0.993148	0.985499	0.99994	0.999997
1369	0.000835934	0.232608	0.611733	0.842517	0.902766	0.993754	0.993171	0.985526	0.999941	0.999997
1370	0.00083593	0.232746	0.612027	0.842689	0.902971	0.993788	0.993194	0.985554	0.999942	0.999998
1371	0.000835927	0.232884	0.612322	0.842859	0.903177	0.993822	0.993216	0.985581	0.999942	0.999998
1372	0.000835923	0.233022	0.612616	0.84303	0.903382	0.993856	0.993239	0.985608	0.999943	0.999998
1373	0.00083592	0.233159	0.61291	0.8432	0.903587	0.99389	0.993261	0.985635	0.999944	0.999998
1374	0.000835916	0.233297	0.613204	0.84337	0.903791	0.993924	0.993283	0.985662	0.999944	0.999998
1375	0.000835913	0.233435	0.613498	0.84354	0.903995	0.993957	0.993306	0.985689	0.999945	0.999998
1376	0.000835909	0.233573	0.613791	0.84371	0.904198	0.993991	0.993328	0.985716	0.999945	0.999998
1377	0.000835906	0.23371	0.614085	0.84388	0.904402	0.994024	0.99335	0.985743	0.999946	0.999998
1378	0.000835902	0.233848	0.614378	0.844049	0.904604	0.994057	0.993372	0.98577	0.999947	0.999998
1379	0.000835899	0.233986	0.614671	0.844218	0.904807	0.99409	0.993394	0.985797	0.999947	0.999998
1380	0.000835895	0.234124	0.614964	0.844387	0.905009	0.994123	0.993416	0.985824	0.999948	0.999998
1381	0.000835892	0.234261	0.615256	0.844555	0.90521	0.994155	0.993437	0.98585	0.999948	0.999998
1382	0.000835889	0.234399	0.615549	0.844724	0.905411	0.994188	0.993459	0.985877	0.999949	0.999998
1383	0.000835885	0.234536	0.615841	0.844892	0.905612	0.99422	0.993481	0.985904	0.99995	0.999998
1384	0.000835882	0.234674	0.616133	0.84506	0.905813	0.994252	0.993503	0.985931	0.99995	0.999998
1385	0.000835878	0.234812	0.616425	0.845228	0.906013	0.994285	0.993524	0.985957	0.999951	0.999998
1386	0.000835875	0.234949	0.616716	0.845395	0.906212	0.994316	0.993546	0.985984	0.999951	0.999998
1387	0.000835871	0.235087	0.617007	0.845563	0.906412	0.994348	0.993567	0.986011	0.999952	0.999998
1388	0.000835868	0.235224	0.617299	0.84573	0.90661	0.99438	0.993588	0.986037	0.999952	0.999998
1389	0.000835864	0.235362	0.61759	0.845897	0.906809	0.994411	0.99361	0.986064	0.999953	0.999999
1390	0.000835861	0.235499	0.61788	0.846064	0.907007	0.994443	0.993631	0.98609	0.999954	0.999999
1391	0.000835858	0.235637	0.618171	0.84623	0.907205	0.994474	0.993652	0.986117	0.999954	0.999999
1392	0.000835854	0.235774	0.618461	0.846396	0.907402	0.994505	0.993673	0.986143	0.999955	0.999999
1393	0.000835851	0.235912	0.618752	0.846562	0.907599	0.994536	0.993694	0.986169	0.999955	0.999999
1394	0.000835847	0.236049	0.619042	0.846728	0.907796	0.994567	0.993715	0.986196	0.999956	0.999999
1395	0.000835844	0.236187	0.619331	0.846894	0.907992	0.994597	0.993736	0.986222	0.999956	0.999999
1396	0.00083584	0.236324	0.619621	0.847059	0.908188	0.994628	0.993756	0.986248	0.999957	0.999999
1397	0.000835837	0.236461	0.619911	0.847225	0.908383	0.994658	0.993777	0.986274	0.999957	0.999999
1398	0.000835834	0.236599	0.6202	0.84739	0.908578	0.994688	0.993798	0.986301	0.999958	0.999999
1399	0.00083583	0.236736	0.620489	0.847555	0.908773	0.994718	0.993818	0.986327	0.999958	0.999999
1400	0.000835827	0.236873	0.620778	0.847719	0.908968	0.994748	0.993839	0.986353	0.999959	0.999999
1401	0.000835824	0.237011	0.621066	0.847884	0.909161	0.994778	0.993859	0.986379	0.999959	0.999999
1402	0.00083582	0.237148	0.621355	0.848048	0.909355	0.994808	0.99388	0.986405	0.99996	0.999999
1403	0.000835817	0.237285	0.621643	0.848212	0.909548	0.994837	0.9939	0.986431	0.99996	0.999999
1404	0.000835813	0.237422	0.621931	0.848376	0.909741	0.994867	0.99392	0.986457	0.99996	0.999999
1405	0.00083581	0.23756	0.622219	0.84854	0.909934	0.994896	0.993941	0.986483	0.999961	0.999999
1406	0.000835807	0.237697	0.622506	0.848703	0.910126	0.994925	0.993961	0.986509	0.999961	0.999999
1407	0.000835803	0.237834	0.622794	0.848866	0.910317	0.994954	0.993981	0.986535	0.999962	0.999999
1408	0.0008358	0.237971	0.623081	0.849029	0.910509	0.994983	0.994001	0.986561	0.999962	0.999999
1409	0.000835797	0.238108	0.623368	0.849192	0.9107	0.995011	0.994021	0.986587	0.999963	0.999999
1410	0.000835793	0.238246	0.623655	0.849355	0.91089	0.99504	0.994041	0.986612	0.999963	0.999999
1411	0.00083579	0.238383	0.623942	0.849517	0.911081	0.995068	0.994061	0.986638	0.999964	0.999999
1412	0.000835787	0.23852	0.624228	0.84968	0.911271	0.995097	0.99408	0.986664	0.999964	0.999999
1413	0.000835783	0.238657	0.624514	0.849842	0.91146	0.995125	0.9941	0.98669	0.999964	0.999999
1414	0.00083578	0.238794	0.6248	0.850004	0.911649	0.995153	0.99412	0.986715	0.999965	0.999999
1415	0.000835777	0.238931	0.625086	0.850165	0.911838	0.995181	0.994139	0.986741	0.999965	0.999999
1416	0.000835773	0.239068	0.625372	0.850327	0.912027	0.995209	0.994159	0.986766	0.999966	0.999999
1417	0.00083577	0.239205	0.625657	0.850488	0.912215	0.995236	0.994178	0.986792	0.999966	0.999999
1418	0.000835767	0.239342	0.625943	0.850649	0.912402	0.995264	0.994198	0.986818	0.999966	0.999999
1419	0.000835764	0.239479	0.626228	0.85081	0.91259	0.995291	0.994217	0.986843	0.999967	0.999999
1420	0.00083576	0.239616	0.626513	0.850971	0.912777	0.995318	0.994236	0.986869	0.999967	0.999999
1421	0.000835757	0.239753	0.626797	0.851131	0.912963	0.995345	0.994255	0.986894	0.999968	0.999999
1422	0.000835754	0.23989	0.627082	0.851292	0.913149	0.995372	0.994275	0.986919	0.999968	0.999999
1423	0.00083575	0.240027	0.627366	0.851452	0.913335	0.995399	0.994294	0.986945	0.999968	0.999999
1424	0.000835747	0.240164	0.62765	0.851612	0.913521	0.995426	0.994313	0.98697	0.999969	0.999999
1425	0.000835744	0.240301	0.627934	0.851772	0.913706	0.995453	0.994332	0.986995	0.999969	0.999999
1426	0.000835741	0.240437	0.628218	0.851931	0.913891	0.995479	0.994351	0.987021	0.999969	0.999999
1427	0.000835737	0.240574	0.628501	0.85209	0.914075	0.995505	0.994369	0.987046	0.99997	0.999999
1428	0.000835734	0.240711	0.628785	0.85225	0.914259	0.995532	0.994388	0.987071	0.99997	0.999999
1429	0.000835731	0.240848	0.629068	0.852409	0.914443	0.995558	0.994407	0.987096	0.999971	1
1430	0.000835728	0.240985	0.629351	0.852567	0.914627	0.995584	0.994426	0.987121	0.999971	1
1431	0.000835724	0.241122	0.629633	0.852726	0.91481	0.99561	0.994444	0.987146	0.999971	1
1432	0.000835721	0.241258	0.629916	0.852885	0.914992	0.995635	0.994463	0.987172	0.999972	1
1433	0.000835718	0.241395	0.630198	0.853043	0.915175	0.995661	0.994481	0.987197	0.999972	1
1434	0.000835715	0.241532	0.63048	0.853201	0.915357	0.995686	0.9945	0.987222	0.999972	1
1435	0.000835711	0.241668	0.630762	0.853359	0.915538	0.995712	0.994518	0.987247	0.999973	1
1436	0.000835708	0.241805	0.631044	0.853516	0.915719	0.995737	0.994536	0.987271	0.999973	1
1437	0.000835705	0.241942	0.631325	0.853674	0.9159	0.995762	0.994555	0.987296	0.999973	1
1438	0.000835702	0.242078	0.631607	0.853831	0.916081	0.995787	0.994573	0.987321	0.999974	1
1439	0.000835698	0.242215	0.631888	0.853988	0.916261	0.995812	0.994591	0.987346	0.999974	1
1440	0.000835695	0.242352	0.632169	0.854145	0.916441	0.995837	0.994609	0.987371	0.999974	1
1441	0.000835692	0.242488	0.632449	0.854302	0.91662	0.995861	0.994627	0.987396	0.999974	1
1442	0.000835689	0.242625	0.63273	0.854459	0.9168	0.995886	0.994645	0.98742	0.999975	1
1443	0.000835686	0.242761	0.63301	0.854615	0.916978	0.99591	0.994663	0.987445	0.999975	1
1444	0.000835682	0.242898	0.633291	0.854771	0.917157	0.995934	0.994681	0.98747	0.999975	1
1445	0.000835679	0.243035	0.63357	0.854927	0.917335	0.995959	0.994699	0.987495	0.999976	1
1446	0.000835676	0.243171	0.63385	0.855083	0.917513	0.995983	0.994717	0.987519	0.999976	1
1447	0.000835673	0.243308	0.63413	0.855239	0.91769	0.996007	0.994734	0.987544	0.999976	1
1448	0.00083567	0.243444	0.634409	0.855394	0.917867	0.99603	0.994752	0.987568	0.999977	1
1449	0.000835667	0.243581	0.634688	0.85555	0.918044	0.996054	0.994769	0.987593	0.999977	1
1450	0.000835663	0.243717	0.634967	0.855705	0.91822	0.996078	0.994787	0.987617	0.999977	1
1451	0.00083566	0.243853	0.635246	0.85586	0.918396	0.996101	0.994804	0.987642	0.999977	1
1452	0.000835657	0.24399	0.635524	0.856014	0.918572	0.996124	0.994822	0.987666	0.999978	1
1453	0.000835654	0.244126	0.635803	0.856169	0.918747	0.996148	0.994839	0.987691	0.999978	1
1454	0.000835651	0.244263	0.636081	0.856323	0.918922	0.996171	0.994857	0.987715	0.999978	1
1455	0.000835648	0.244399	0.636359	0.856478	0.919097	0.996194	0.994874	0.98774	0.999978	1
1456	0.000835644	0.244535	0.636637	0.856632	0.919271	0.996217	0.994891	0.987764	0.999979	1
1457	0.000835641	0.244672	0.636914	0.856785	0.919445	0.996239	0.994908	0.987788	0.999979	1
1458	0.000835638	0.244808	0.637192	0.856939	0.919619	0.996262	0.994925	0.987812	0.999979	1
1459	0.000835635	0.244944	0.637469	0.857093	0.919792	0.996284	0.994942	0.987837	0.999979	1
1460	0.000835632	0.245081	0.637746	0.857246	0.919965	0.996307	0.994959	0.987861	0.99998	1
1461	0.000835629	0.245217	0.638023	0.857399	0.920138	0.996329	0.994976	0.987885	0.99998	1
1462	0.000835626	0.245353	0.638299	0.857552	0.92031	0.996351	0.994993	0.987909	0.99998	1
1463	0.000835622	0.245489	0.638576	0.857705	0.920482	0.996373	0.99501	0.987933	0.99998	1
1464	0.000835619	0.245626	0.638852	0.857857	0.920654	0.996395	0.995027	0.987957	0.999981	1
1465	0.000835616	0.245762	0.639128	0.85801	0.920825	0.996417	0.995044	0.987981	0.999981	1
1466	0.000835613	0.245898	0.639404	0.858162	0.920996	0.996439	0.99506	0.988005	0.999981	1
1467	0.00083561	0.246034	0.639679	0.858314	0.921167	0.996461	0.995077	0.988029	0.999981	1
1468	0.000835607	0.24617	0.639955	0.858466	0.921337	0.996482	0.995094	0.988053	0.999982	1
1469	0.000835604	0.246306	0.64023	0.858618	0.921507	0.996504	0.99511	0.988077	0.999982	1
1470	0.000835601	0.246442	0.640505	0.858769	0.921677	0.996525	0.995127	0.988101	0.999982	1
1471	0.000835598	0.246579	0.64078	0.858921	0.921846	0.996546	0.995143	0.988125	0.999982	1
1472	0.000835595	0.246715	0.641054	0.859072	0.922015	0.996567	0.995159	0.988149	0.999982	1
1473	0.000835592	0.246851	0.641329	0.859223	0.922184	0.996588	0.995176	0.988173	0.999983	1
1474	0.000835588	0.246987	0.641603	0.859374	0.922352	0.996609	0.995192	0.988197	0.999983	1
1475	0.000835585	0.247123	0.641877	0.859524	0.92252	0.99663	0.995208	0.98822	0.999983	1
1476	0.000835582	0.247259	0.642151	0.859675	0.922688	0.996651	0.995224	0.988244	0.999983	1
1477	0.000835579	0.247395	0.642424	0.859825	0.922855	0.996671	0.995241	0.988268	0.999984	1
1478	0.000835576	0.247531	0.642698	0.859975	0.923022	0.996692	0.995257	0.988291	0.999984	1
1479	0.000835573	0.247667	0.642971	0.860125	0.923189	0.996712	0.995273	0.988315	0.999984	1
1480	0.00083557	0.247803	0.643244	0.860275	0.923355	0.996732	0.995289	0.988339	0.999984	1
1481	0.000835567	0.247939	0.643517	0.860425	0.923521	0.996752	0.995305	0.988362	0.999984	1
1482	0.000835564	0.248075	0.643789	0.860574	0.923687	0.996772	0.99532	0.988386	0.999985	1
1483	0.000835561	0.24821	0.644062	0.860723	0.923852	0.996792	0.995336	0.988409	0.999985	1
1484	0.000835558	0.248346	0.644334	0.860872	0.924017	0.996812	0.995352	0.988433	0.999985	1
1485	0.000835555	0.248482	0.644606	0.861021	0.924182	0.996832	0.995368	0.988456	0.999985	1
1486	0.000835552	0.248618	0.644878	0.86117	0.924346	0.996852	0.995383	0.98848	0.999985	1
1487	0.000835549	0.248754	0.64515	0.861319	0.92451	0.996871	0.995399	0.988503	0.999985	1
1488	0.000835546	0.24889	0.645421	0.861467	0.924674	0.996891	0.995415	0.988527	0.999986	1
1489	0.000835543	0.249025	0.645692	0.861615	0.924837	0.99691	0.99543	0.98855	0.999986	1
1490	0.00083554	0.249161	0.645963	0.861763	0.925	0.996929	0.995446	0.988573	0.999986	1
1491	0.000835537	0.249297	0.646234	0.861911	0.925163	0.996948	0.995461	0.988597	0.999986	1
1492	0.000835534	0.249433	0.646505	0.862059	0.925326	0.996967	0.995477	0.98862	0.999986	1
1493	0.000835531	0.249569	0.646775	0.862206	0.925488	0.996986	0.995492	0.988643	0.999986	1
1494	0.000835528	0.249704	0.647046	0.862354	0.92565	0.997005	0.995507	0.988666	0.999987	1
1495	0.000835525	0.24984	0.647316	0.862501	0.925811	0.997024	0.995523	0.98869	0.999987	1
1496	0.000835522	0.249976	0.647585	0.862648	0.925972	0.997043	0.995538	0.988713	0.999987	1
1497	0.000835519	0.250111	0.647855	0.862795	0.926133	0.997061	0.995553	0.988736	0.999987	1
1498	0.000835516	0.250247	0.648125	0.862941	0.926294	0.99708	0.995568	0.988759	0.999987	1
1499	0.000835513	0.250383	0.648394	0.863088	0.926454	0.997098	0.995583	0.988782	0.999987	1
1500	0.00083551	0.250518	0.648663	0.863234	0.926614	0.997116	0.995598	0.988805	0.999988	1
1501	0.000835507	0.250654	0.648932	0.86338	0.926774	0.997134	0.995613	0.988828	0.999988	1
1502	0.000835504	0.250789	0.649201	0.863526	0.926933	0.997152	0.995628	0.988851	0.999988	1
1503	0.000835501	0.250925	0.649469	0.863672	0.927092	0.99717	0.995643	0.988874	0.999988	1
1504	0.000835498	0.25106	0.649737	0.863818	0.927251	0.997188	0.995658	0.988897	0.999988	1
1505	0.000835495	0.251196	0.650005	0.863963	0.927409	0.997206	0.995673	0.98892	0.999988	1
1506	0.000835492	0.251332	0.650273	0.864108	0.927567	0.997224	0.995687	0.988943	0.999989	1
1507	0.000835489	0.251467	0.650541	0.864254	0.927725	0.997241	0.995702	0.988966	0.999989	1
1508	0.000835486	0.251603	0.650809	0.864399	0.927882	0.997259	0.995717	0.988988	0.999989	1
1509	0.000835483	0.251738	0.651076	0.864543	0.928039	0.997276	0.995731	0.989011	0.999989	1
1510	0.00083548	0.251873	0.651343	0.864688	0.928196	0.997293	0.995746	0.989034	0.999989	1
1511	0.000835477	0.252009	0.65161	0.864832	0.928353	0.997311	0.99576	0.989057	0.999989	1
1512	0.000835474	0.252144	0.651877	0.864977	0.928509	0.997328	0.995775	0.989079	0.999989	1
1513	0.000835472	0.25228	0.652143	0.865121	0.928665	0.997345	0.995789	0.989102	0.999989	1
1514	0.000835469	0.252415	0.652409	0.865265	0.92882	0.997362	0.995804	0.989125	0.99999	1
1515	0.000835466	0.25255	0.652676	0.865409	0.928976	0.997379	0.995818	0.989147	0.99999	1
1516	0.000835463	0.252686	0.652942	0.865552	0.929131	0.997395	0.995832	0.98917	0.99999	1
1517	0.00083546	0.252821	0.653207	0.865696	0.929285	0.997412	0.995847	0.989193	0.99999	1
1518	0.000835457	0.252956	0.653473	0.865839	0.92944	0.997429	0.995861	0.989215	0.99999	1
1519	0.000835454	0.253092	0.653738	0.865982	0.929594	0.997445	0.995875	0.989238	0.99999	1
1520	0.000835451	0.253227	0.654003	0.866125	0.929748	0.997462	0.995889	0.98926	0.99999	1
1521	0.000835448	0.253362	0.654268	0.866268	0.929901	0.997478	0.995903	0.989283	0.999991	1
1522	0.000835445	0.253498	0.654533	0.86641	0.930054	0.997494	0.995917	0.989305	0.999991	1
1523	0.000835442	0.253633	0.654798	0.866553	0.930207	0.99751	0.995931	0.989328	0.999991	1
1524	0.00083544	0.253768	0.655062	0.866695	0.93036	0.997526	0.995945	0.98935	0.999991	1
1525	0.000835437	0.253903	0.655326	0.866837	0.930512	0.997542	0.995959	0.989372	0.999991	1
1526	0.000835434	0.254039	0.65559	0.866979	0.930664	0.997558	0.995973	0.989395	0.999991	1
1527	0.000835431	0.254174	0.655854	0.867121	0.930815	0.997574	0.995987	0.989417	0.999991	1
1528	0.000835428	0.254309	0.656117	0.867262	0.930967	0.99759	0.996001	0.989439	0.999991	1
1529	0.000835425	0.254444	0.656381	0.867404	0.931118	0.997605	0.996015	0.989461	0.999991	1
1530	0.000835422	0.254579	0.656644	0.867545	0.931269	0.997621	0.996028	0.989484	0.999992	1
1531	0.000835419	0.254714	0.656907	0.867686	0.931419	0.997636	0.996042	0.989506	0.999992	1
1532	0.000835417	0.254849	0.65717	0.867827	0.931569	0.997652	0.996056	0.989528	0.999992	1
1533	0.000835414	0.254984	0.657432	0.867968	0.931719	0.997667	0.996069	0.98955	0.999992	1
1534	0.000835411	0.255119	0.657695	0.868108	0.931869	0.997682	0.996083	0.989572	0.999992	1
1535	0.000835408	0.255255	0.657957	0.868249	0.932018	0.997697	0.996096	0.989594	0.999992	1
1536	0.000835405	0.25539	0.658219	0.868389	0.932167	0.997712	0.99611	0.989616	0.999992	1
1537	0.000835402	0.255525	0.658481	0.868529	0.932316	0.997727	0.996123	0.989638	0.999992	1
1538	0.0008354	0.25566	0.658743	0.868669	0.932464	0.997742	0.996137	0.98966	0.999992	1
1539	0.000835397	0.255795	0.659004	0.868809	0.932612	0.997757	0.99615	0.989682	0.999992	1
1540	0.000835394	0.25593	0.659265	0.868949	0.93276	0.997771	0.996163	0.989704	0.999993	1
1541	0.000835391	0.256065	0.659526	0.869088	0.932907	0.997786	0.996177	0.989726	0.999993	1
1542	0.000835388	0.256199	0.659787	0.869227	0.933055	0.997801	0.99619	0.989748	0.999993	1
1543	0.000835385	0.256334	0.660048	0.869366	0.933202	0.997815	0.996203	0.98977	0.999993	1
1544	0.000835383	0.256469	0.660308	0.869505	0.933348	0.997829	0.996216	0.989792	0.999993	1
1545	0.00083538	0.256604	0.660568	0.869644	0.933495	0.997844	0.996229	0.989814	0.999993	1
1546	0.000835377	0.256739	0.660828	0.869783	0.933641	0.997858	0.996242	0.989836	0.999993	1
1547	0.000835374	0.256874	0.661088	0.869921	0.933786	0.997872	0.996255	0.989857	0.999993	1
1548	0.000835371	0.257009	0.661348	0.87006	0.933932	0.997886	0.996268	0.989879	0.999993	1
1549	0.000835369	0.257144	0.661607	0.870198	0.934077	0.9979	0.996281	0.989901	0.999993	1
1550	0.000835366	0.257278	0.661867	0.870336	0.934222	0.997914	0.996294	0.989923	0.999993	1
1551	0.000835363	0.257413	0.662126	0.870473	0.934367	0.997928	0.996307	0.989944	0.999994	1
1552	0.00083536	0.257548	0.662385	0.870611	0.934511	0.997942	0.99632	0.989966	0.999994	1
1553	0.000835357	0.257683	0.662643	0.870749	0.934655	0.997955	0.996333	0.989987	0.999994	1
1554	0.000835355	0.257818	0.662902	0.870886	0.934799	0.997969	0.996346	0.990009	0.999994	1
1555	0.000835352	0.257952	0.66316	0.871023	0.934942	0.997982	0.996358	0.990031	0.999994	1
1556	0.000835349	0.258087	0.663418	0.87116	0.935086	0.997996	0.996371	0.990052	0.999994	1
1557	0.000835346	0.258222	0.663676	0.871297	0.935229	0.998009	0.996384	0.990074	0.999994	1
1558	0.000835344	0.258356	0.663934	0.871434	0.935371	0.998022	0.996396	0.990095	0.999994	1
1559	0.000835341	0.258491	0.664192	0.87157	0.935514	0.998036	0.996409	0.990117	0.999994	1
1560	0.000835338	0.258626	0.664449	0.871706	0.935656	0.998049	0.996421	0.990138	0.999994	1
1561	0.000835335	0.25876	0.664706	0.871843	0.935797	0.998062	0.996434	0.990159	0.999994	1
1562	0.000835333	0.258895	0.664963	0.871979	0.935939	0.998075	0.996446	0.990181	0.999994	1
1563	0.00083533	0.25903	0.66522	0.872115	0.93608	0.998088	0.996459	0.990202	0.999994	1
1564	0.000835327	0.259164	0.665476	0.87225	0.936221	0.998101	0.996471	0.990224	0.999995	1
1565	0.000835324	0.259299	0.665733	0.872386	0.936362	0.998113	0.996483	0.990245	0.999995	1
1566	0.000835322	0.259433	0.665989	0.872521	0.936502	0.998126	0.996496	0.990266	0.999995	1
1567	0.000835319	0.259568	0.666245	0.872657	0.936642	0.998139	0.996508	0.990287	0.999995	1
1568	0.000835316	0.259702	0.666501	0.872792	0.936782	0.998151	0.99652	0.990309	0.999995	1
1569	0.000835313	0.259837	0.666756	0.872927	0.936922	0.998164	0.996532	0.99033	0.999995	1
1570	0.000835311	0.259971	0.667011	0.873061	0.937061	0.998176	0.996545	0.990351	0.999995	1
1571	0.000835308	0.260106	0.667267	0.873196	0.9372	0.998188	0.996557	0.990372	0.999995	1
1572	0.000835305	0.26024	0.667522	0.87333	0.937339	0.998201	0.996569	0.990393	0.999995	1
1573	0.000835302	0.260375	0.667776	0.873465	0.937477	0.998213	0.996581	0.990414	0.999995	1
1574	0.0008353	0.260509	0.668031	0.873599	0.937615	0.998225	0.996593	0.990435	0.999995	1
1575	0.000835297	0.260644	0.668286	0.873733	0.937753	0.998237	0.996605	0.990456	0.999995	1
1576	0.000835294	0.260778	0.66854	0.873867	0.937891	0.998249	0.996617	0.990477	0.999995	1
1577	0.000835292	0.260912	0.668794	0.874	0.938028	0.998261	0.996629	0.990498	0.999995	1
1578	0.000835289	0.261047	0.669048	0.874134	0.938165	0.998273	0.996641	0.990519	0.999995	1
1579	0.000835286	0.261181	0.669301	0.874267	0.938302	0.998284	0.996652	0.99054	0.999996	1
1580	0.000835283	0.261316	0.669555	0.8744	0.938439	0.998296	0.996664	0.990561	0.999996	1
1581	0.000835281	0.26145	0.669808	0.874533	0.938575	0.998308	0.996676	0.990582	0.999996	1
1582	0.000835278	0.261584	0.670061	0.874666	0.938711	0.998319	0.996688	0.990603	0.999996	1
1583	0.000835275	0.261718	0.670314	0.874799	0.938847	0.998331	0.996699	0.990624	0.999996	1
1584	0.000835273	0.261853	0.670567	0.874931	0.938982	0.998342	0.996711	0.990645	0.999996	1
1585	0.00083527	0.261987	0.670819	0.875064	0.939118	0.998354	0.996723	0.990665	0.999996	1
1586	0.000835267	0.262121	0.671071	0.875196	0.939252	0.998365	0.996734	0.990686	0.999996	1
1587	0.000835265	0.262256	0.671323	0.875328	0.939387	0.998376	0.996746	0.990707	0.999996	1
1588	0.000835262	0.26239	0.671575	0.87546	0.939522	0.998387	0.996757	0.990728	0.999996	1
1589	0.000835259	0.262524	0.671827	0.875592	0.939656	0.998398	0.996769	0.990748	0.999996	1
1590	0.000835257	0.262658	0.672079	0.875723	0.93979	0.998409	0.99678	0.990769	0.999996	1
1591	0.000835254	0.262792	0.67233	0.875855	0.939923	0.99842	0.996792	0.99079	0.999996	1
1592	0.000835251	0.262927	0.672581	0.875986	0.940056	0.998431	0.996803	0.99081	0.999996	1
1593	0.000835249	0.263061	0.672832	0.876117	0.94019	0.998442	0.996815	0.990831	0.999996	1
1594	0.000835246	0.263195	0.673083	0.876248	0.940322	0.998453	0.996826	0.990851	0.999996	1
1595	0.000835243	0.263329	0.673333	0.876379	0.940455	0.998464	0.996837	0.990872	0.999996	1
1596	0.000835241	0.263463	0.673584	0.87651	0.940587	0.998474	0.996848	0.990892	0.999996	1
1597	0.000835238	0.263597	0.673834	0.87664	0.940719	0.998485	0.99686	0.990913	0.999996	1
1598	0.000835236	0.263731	0.674084	0.876771	0.940851	0.998495	0.996871	0.990933	0.999997	1
1599	0.000835233	0.263865	0.674334	0.876901	0.940982	0.998506	0.996882	0.990954	0.999997	1
1600	0.00083523	0.263999	0.674583	0.877031	0.941114	0.998516	0.996893	0.990974	0.999997	1
1601	0.000835228	0.264133	0.674833	0.877161	0.941245	0.998527	0.996904	0.990994	0.999997	1
1602	0.000835225	0.264267	0.675082	0.87729	0.941375	0.998537	0.996915	0.991015	0.999997	1
1603	0.000835222	0.264401	0.675331	0.87742	0.941506	0.998547	0.996926	0.991035	0.999997	1
1604	0.00083522	0.264535	0.67558	0.87755	0.941636	0.998557	0.996937	0.991055	0.999997	1
1605	0.000835217	0.264669	0.675828	0.877679	0.941766	0.998567	0.996948	0.991076	0.999997	1
1606	0.000835215	0.264803	0.676077	0.877808	0.941896	0.998577	0.996959	0.991096	0.999997	1
1607	0.000835212	0.264937	0.676325	0.877937	0.942025	0.998587	0.99697	0.991116	0.999997	1
1608	0.000835209	0.265071	0.676573	0.878066	0.942154	0.998597	0.996981	0.991136	0.999997	1
1609	0.000835207	0.265205	0.676821	0.878194	0.942283	0.998607	0.996992	0.991156	0.999997	1
1610	0.000835204	0.265339	0.677068	0.878323	0.942412	0.998617	0.997003	0.991177	0.999997	1
1611	0.000835202	0.265473	0.677316	0.878451	0.94254	0.998627	0.997013	0.991197	0.999997	1
1612	0.000835199	0.265607	0.677563	0.87858	0.942668	0.998636	0.997024	0.991217	0.999997	1
1613	0.000835196	0.26574	0.67781	0.878708	0.942796	0.998646	0.997035	0.991237	0.999997	1
1614	0.000835194	0.265874	0.678057	0.878836	0.942924	0.998655	0.997046	0.991257	0.999997	1
1615	0.000835191	0.266008	0.678304	0.878963	0.943051	0.998665	0.997056	0.991277	0.999997	1
1616	0.000835189	0.266142	0.67855	0.879091	0.943178	0.998674	0.997067	0.991297	0.999997	1
1617	0.000835186	0.266276	0.678797	0.879218	0.943305	0.998684	0.997077	0.991317	0.999997	1
1618	0.000835183	0.266409	0.679043	0.879346	0.943432	0.998693	0.997088	0.991337	0.999997	1
1619	0.000835181	0.266543	0.679289	0.879473	0.943558	0.998702	0.997098	0.991357	0.999997	1
1620	0.000835178	0.266677	0.679535	0.8796	0.943684	0.998711	0.997109	0.991377	0.999997	1
1621	0.000835176	0.266811	0.67978	0.879727	0.94381	0.998721	0.997119	0.991397	0.999997	1
1622	0.000835173	0.266944	0.680026	0.879853	0.943936	0.99873	0.99713	0.991416	0.999998	1
1623	0.000835171	0.267078	0.680271	0.87998	0.944061	0.998739	0.99714	0.991436	0.999998	1
1624	0.000835168	0.267212	0.680516	0.880106	0.944186	0.998748	0.997151	0.991456	0.999998	1
1625	0.000835166	0.267345	0.680761	0.880233	0.944311	0.998757	0.997161	0.991476	0.999998	1
1626	0.000835163	0.267479	0.681005	0.880359	0.944436	0.998765	0.997171	0.991495	0.999998	1
1627	0.00083516	0.267613	0.68125	0.880485	0.94456	0.998774	0.997181	0.991515	0.999998	1
1628	0.000835158	0.267746	0.681494	0.88061	0.944684	0.998783	0.997192	0.991535	0.999998	1
1629	0.000835155	0.26788	0.681738	0.880736	0.944808	0.998792	0.997202	0.991554	0.999998	1
1630	0.000835153	0.268014	0.681982	0.880862	0.944932	0.9988	0.997212	0.991574	0.999998	1
1631	0.00083515	0.268147	0.682225	0.880987	0.945055	0.998809	0.997222	0.991594	0.999998	1
1632	0.000835148	0.268281	0.682469	0.881112	0.945178	0.998817	0.997232	0.991613	0.999998	1
1633	0.000835145	0.268414	0.682712	0.881237	0.945301	0.998826	0.997242	0.991633	0.999998	1
1634	0.000835143	0.268548	0.682955	0.881362	0.945424	0.998834	0.997252	0.991652	0.999998	1
1635	0.00083514	0.268681	0.683198	0.881487	0.945546	0.998843	0.997262	0.991672	0.999998	1
1636	0.000835138	0.268815	0.683441	0.881612	0.945668	0.998851	0.997272	0.991691	0.999998	1
1637	0.000835135	0.268948	0.683683	0.881736	0.94579	0.998859	0.997282	0.991711	0.999998	1
1638	0.000835133	0.269082	0.683926	0.88186	0.945912	0.998868	0.997292	0.99173	0.999998	1
1639	0.00083513	0.269215	0.684168	0.881984	0.946033	0.998876	0.997302	0.99175	0.999998	1
1640	0.000835128	0.269349	0.68441	0.882108	0.946155	0.998884	0.997312	0.991769	0.999998	1
1641	0.000835125	0.269482	0.684652	0.882232	0.946276	0.998892	0.997322	0.991788	0.999998	1
1642	0.000835123	0.269616	0.684893	0.882356	0.946396	0.9989	0.997332	0.991808	0.999998	1
1643	0.00083512	0.269749	0.685134	0.88248	0.946517	0.998908	0.997342	0.991827	0.999998	1
1644	0.000835118	0.269882	0.685376	0.882603	0.946637	0.998916	0.997351	0.991846	0.999998	1
1645	0.000835115	0.270016	0.685617	0.882726	0.946757	0.998924	0.997361	0.991866	0.999998	1
1646	0.000835113	0.270149	0.685857	0.88285	0.946877	0.998932	0.997371	0.991885	0.999998	1
1647	0.00083511	0.270282	0.686098	0.882973	0.946996	0.998939	0.997381	0.991904	0.999998	1
1648	0.000835108	0.270416	0.686339	0.883095	0.947115	0.998947	0.99739	0.991923	0.999998	1
1649	0.000835105	0.270549	0.686579	0.883218	0.947234	0.998955	0.9974	0.991942	0.999998	1
1650	0.000835103	0.270682	0.686819	0.883341	0.947353	0.998962	0.997409	0.991962	0.999998	1
1651	0.0008351	0.270816	0.687059	0.883463	0.947472	0.99897	0.997419	0.991981	0.999998	1
1652	0.000835098	0.270949	0.687298	0.883585	0.94759	0.998977	0.997429	0.992	0.999998	1
1653	0.000835095	0.271082	0.687538	0.883707	0.947708	0.998985	0.997438	0.992019	0.999998	1
1654	0.000835093	0.271215	0.687777	0.883829	0.947826	0.998992	0.997447	0.992038	0.999998	1
1655	0.00083509	0.271349	0.688016	0.883951	0.947944	0.999	0.997457	0.992057	0.999998	1
1656	0.000835088	0.271482	0.688255	0.884073	0.948061	0.999007	0.997466	0.992076	0.999998	1
1657	0.000835085	0.271615	0.688494	0.884194	0.948178	0.999014	0.997476	0.992095	0.999998	1
1658	0.000835083	0.271748	0.688733	0.884316	0.948295	0.999022	0.997485	0.992114	0.999998	1
1659	0.000835081	0.271881	0.688971	0.884437	0.948412	0.999029	0.997494	0.992133	0.999999	1
1660	0.000835078	0.272015	0.689209	0.884558	0.948528	0.999036	0.997504	0.992151	0.999999	1
1661	0.000835076	0.272148	0.689447	0.884679	0.948644	0.999043	0.997513	0.99217	0.999999	1
1662	0.000835073	0.272281	0.689685	0.8848	0.94876	0.99905	0.997522	0.992189	0.999999	1
1663	0.000835071	0.272414	0.689922	0.884921	0.948876	0.999057	0.997532	0.992208	0.999999	1
1664	0.000835068	0.272547	0.69016	0.885041	0.948992	0.999064	0.997541	0.992227	0.999999	1
1665	0.000835066	0.27268	0.690397	0.885161	0.949107	0.999071	0.99755	0.992245	0.999999	1
1666	0.000835063	0.272813	0.690634	0.885282	0.949222	0.999078	0.997559	0.992264	0.999999	1
1667	0.000835061	0.272946	0.690871	0.885402	0.949337	0.999085	0.997568	0.992283	0.999999	1
1668	0.000835059	0.273079	0.691108	0.885522	0.949451	0.999092	0.997577	0.992302	0.999999	1
1669	0.000835056	0.273212	0.691344	0.885641	0.949566	0.999098	0.997586	0.99232	0.999999	1
1670	0.000835054	0.273345	0.69158	0.885761	0.94968	0.999105	0.997595	0.992339	0.999999	1
1671	0.000835051	0.273478	0.691817	0.885881	0.949794	0.999112	0.997604	0.992357	0.999999	1
1672	0.000835049	0.273611	0.692052	0.886	0.949907	0.999118	0.997613	0.992376	0.999999	1
1673	0.000835047	0.273744	0.692288	0.886119	0.950021	0.999125	0.997622	0.992395	0.999999	1
1674	0.000835044	0.273877	0.692524	0.886238	0.950134	0.999131	0.997631	0.992413	0.999999	1
1675	0.000835042	0.27401	0.692759	0.886357	0.950247	0.999138	0.99764	0.992432	0.999999	1
1676	0.000835039	0.274143	0.692994	0.886476	0.95036	0.999144	0.997649	0.99245	0.999999	1
1677	0.000835037	0.274276	0.693229	0.886595	0.950472	0.999151	0.997658	0.992468	0.999999	1
1678	0.000835035	0.274409	0.693464	0.886713	0.950585	0.999157	0.997667	0.992487	0.999999	1
1679	0.000835032	0.274542	0.693699	0.886832	0.950697	0.999163	0.997676	0.992505	0.999999	1
1680	0.00083503	0.274675	0.693933	0.88695	0.950809	0.99917	0.997684	0.992524	0.999999	1
1681	0.000835027	0.274808	0.694167	0.887068	0.95092	0.999176	0.997693	0.992542	0.999999	1
1682	0.000835025	0.27494	0.694401	0.887186	0.951032	0.999182	0.997702	0.99256	0.999999	1
1683	0.000835023	0.275073	0.694635	0.887304	0.951143	0.999188	0.997711	0.992579	0.999999	1
1684	0.00083502	0.275206	0.694869	0.887421	0.951254	0.999194	0.997719	0.992597	0.999999	1
1685	0.000835018	0.275339	0.695102	0.887539	0.951365	0.9992	0.997728	0.992615	0.999999	1
1686	0.000835015	0.275472	0.695336	0.887656	0.951475	0.999206	0.997736	0.992633	0.999999	1
1687	0.000835013	0.275605	0.695569	0.887774	0.951586	0.999212	0.997745	0.992652	0.999999	1
1688	0.000835011	0.275737	0.695802	0.887891	0.951696	0.999218	0.997754	0.99267	0.999999	1
1689	0.000835008	0.27587	0.696035	0.888008	0.951806	0.999224	0.997762	0.992688	0.999999	1
1690	0.000835006	0.276003	0.696267	0.888125	0.951915	0.99923	0.997771	0.992706	0.999999	1
1691	0.000835004	0.276135	0.696499	0.888241	0.952025	0.999236	0.997779	0.992724	0.999999	1
1692	0.000835001	0.276268	0.696732	0.888358	0.952134	0.999242	0.997788	0.992742	0.999999	1
1693	0.000834999	0.276401	0.696964	0.888474	0.952243	0.999247	0.997796	0.99276	0.999999	1
1694	0.000834997	0.276534	0.697195	0.888591	0.952352	0.999253	0.997804	0.992778	0.999999	1
1695	0.000834994	0.276666	0.697427	0.888707	0.95246	0.999259	0.997813	0.992796	0.999999	1
1696	0.000834992	0.276799	0.697659	0.888823	0.952569	0.999264	0.997821	0.992814	0.999999	1
1697	0.000834989	0.276931	0.69789	0.888939	0.952677	0.99927	0.99783	0.992832	0.999999	1
1698	0.000834987	0.277064	0.698121	0.889054	0.952785	0.999276	0.997838	0.99285	0.999999	1
1699	0.000834985	0.277197	0.698352	0.88917	0.952892	0.999281	0.997846	0.992868	0.999999	1
1700	0.000834982	0.277329	0.698583	0.889285	0.953	0.999287	0.997854	0.992886	0.999999	1
1701	0.00083498	0.277462	0.698813	0.889401	0.953107	0.999292	0.997863	0.992904	0.999999	1
1702	0.000834978	0.277594	0.699043	0.889516	0.953214	0.999297	0.997871	0.992921	0.999999	1
1703	0.000834975	0.277727	0.699274	0.889631	0.953321	0.999303	0.997879	0.992939	0.999999	1
1704	0.000834973	0.277859	0.699503	0.889746	0.953428	0.999308	0.997887	0.992957	0.999999	1
1705	0.000834971	0.277992	0.699733	0.88986	0.953534	0.999313	0.997895	0.992975	0.999999	1
1706	0.000834968	0.278125	0.699963	0.889975	0.95364	0.999319	0.997904	0.992992	0.999999	1
1707	0.000834966	0.278257	0.700192	0.89009	0.953746	0.999324	0.997912	0.99301	0.999999	1
1708	0.000834964	0.278389	0.700422	0.890204	0.953852	0.999329	0.99792	0.993028	0.999999	1
1709	0.000834962	0.278522	0.700651	0.890318	0.953958	0.999334	0.997928	0.993045	0.999999	1
1710	0.000834959	0.278654	0.700879	0.890432	0.954063	0.999339	0.997936	0.993063	0.999999	1
1711	0.000834957	0.278787	0.701108	0.890546	0.954168	0.999344	0.997944	0.993081	0.999999	1
1712	0.000834955	0.278919	0.701337	0.89066	0.954273	0.99935	0.997952	0.993098	0.999999	1
1713	0.000834952	0.279052	0.701565	0.890774	0.954378	0.999355	0.99796	0.993116	0.999999	1
1714	0.00083495	0.279184	0.701793	0.890887	0.954482	0.99936	0.997968	0.993133	0.999999	1
1715	0.000834948	0.279316	0.702021	0.891001	0.954586	0.999364	0.997975	0.993151	0.999999	1
1716	0.000834945	0.279449	0.702249	0.891114	0.95469	0.999369	0.997983	0.993168	0.999999	1
1717	0.000834943	0.279581	0.702476	0.891227	0.954794	0.999374	0.997991	0.993186	0.999999	1
1718	0.000834941	0.279714	0.702704	0.89134	0.954898	0.999379	0.997999	0.993203	0.999999	1
1719	0.000834939	0.279846	0.702931	0.891453	0.955001	0.999384	0.998007	0.99322	0.999999	1
1720	0.000834936	0.279978	0.703158	0.891565	0.955105	0.999389	0.998015	0.993238	0.999999	1
1721	0.000834934	0.28011	0.703385	0.891678	0.955208	0.999393	0.998022	0.993255	0.999999	1
1722	0.000834932	0.280243	0.703612	0.89179	0.955311	0.999398	0.99803	0.993272	0.999999	1
1723	0.000834929	0.280375	0.703838	0.891903	0.955413	0.999403	0.998038	0.99329	0.999999	1
1724	0.000834927	0.280507	0.704064	0.892015	0.955516	0.999407	0.998046	0.993307	0.999999	1
1725	0.000834925	0.28064	0.70429	0.892127	0.955618	0.999412	0.998053	0.993324	0.999999	1
1726	0.000834923	0.280772	0.704516	0.892239	0.95572	0.999417	0.998061	0.993341	0.999999	1
1727	0.00083492	0.280904	0.704742	0.892351	0.955822	0.999421	0.998068	0.993358	0.999999	1
1728	0.000834918	0.281036	0.704968	0.892462	0.955923	0.999426	0.998076	0.993376	0.999999	1
1729	0.000834916	0.281168	0.705193	0.892574	0.956025	0.99943	0.998084	0.993393	0.999999	1
1730	0.000834914	0.281301	0.705418	0.892685	0.956126	0.999435	0.998091	0.99341	0.999999	1
1731	0.000834911	0.281433	0.705643	0.892796	0.956227	0.999439	0.998099	0.993427	0.999999	1
1732	0.000834909	0.281565	0.705868	0.892908	0.956328	0.999444	0.998106	0.993444	0.999999	1
1733	0.000834907	0.281697	0.706093	0.893019	0.956428	0.999448	0.998114	0.993461	0.999999	1
1734	0.000834905	0.281829	0.706317	0.893129	0.956529	0.999452	0.998121	0.993478	0.999999	1
1735	0.000834902	0.281961	0.706542	0.89324	0.956629	0.999457	0.998129	0.993495	0.999999	1
1736	0.0008349	0.282093	0.706766	0.893351	0.956729	0.999461	0.998136	0.993512	1	1
1737	0.000834898	0.282225	0.70699	0.893461	0.956829	0.999465	0.998143	0.993529	1	1
1738	0.000834896	0.282357	0.707213	0.893571	0.956928	0.999469	0.998151	0.993546	1	1
1739	0.000834893	0.282489	0.707437	0.893682	0.957028	0.999473	0.998158	0.993563	1	1
1740	0.000834891	0.282621	0.70766	0.893792	0.957127	0.999478	0.998165	0.993579	1	1
1741	0.000834889	0.282754	0.707883	0.893902	0.957226	0.999482	0.998173	0.993596	1	1
1742	0.000834887	0.282886	0.708106	0.894011	0.957324	0.999486	0.99818	0.993613	1	1
1743	0.000834884	0.283018	0.708329	0.894121	0.957423	0.99949	0.998187	0.99363	1	1
1744	0.000834882	0.28315	0.708552	0.894231	0.957521	0.999494	0.998194	0.993647	1	1
1745	0.00083488	0.283281	0.708774	0.89434	0.95762	0.999498	0.998202	0.993663	1	1
1746	0.000834878	0.283413	0.708997	0.894449	0.957718	0.999502	0.998209	0.99368	1	1
1747	0.000834876	0.283545	0.709219	0.894558	0.957815	0.999506	0.998216	0.993697	1	1
1748	0.000834873	0.283677	0.709441	0.894667	0.957913	0.99951	0.998223	0.993713	1	1
1749	0.000834871	0.283809	0.709663	0.894776	0.95801	0.999514	0.99823	0.99373	1	1
1750	0.000834869	0.283941	0.709884	0.894885	0.958108	0.999518	0.998237	0.993746	1	1
1751	0.000834867	0.284073	0.710106	0.894994	0.958205	0.999521	0.998245	0.993763	1	1
1752	0.000834865	0.284205	0.710327	0.895102	0.958301	0.999525	0.998252	0.99378	1	1
1753	0.000834862	0.284337	0.710548	0.895211	0.958398	0.999529	0.998259	0.993796	1	1
1754	0.00083486	0.284469	0.710769	0.895319	0.958494	0.999533	0.998266	0.993813	1	1
1755	0.000834858	0.2846	0.710989	0.895427	0.958591	0.999536	0.998273	0.993829	1	1
1756	0.000834856	0.284732	0.71121	0.895535	0.958687	0.99954	0.99828	0.993845	1	1
1757	0.000834854	0.284864	0.71143	0.895643	0.958782	0.999544	0.998287	0.993862	1	1
1758	0.000834851	0.284996	0.71165	0.89575	0.958878	0.999547	0.998293	0.993878	1	1
1759	0.000834849	0.285128	0.71187	0.895858	0.958974	0.999551	0.9983	0.993895	1	1
1760	0.000834847	0.285259	0.71209	0.895965	0.959069	0.999555	0.998307	0.993911	1	1
1761	0.000834845	0.285391	0.71231	0.896073	0.959164	0.999558	0.998314	0.993927	1	1
1762	0.000834843	0.285523	0.712529	0.89618	0.959259	0.999562	0.998321	0.993944	1	1
1763	0.000834841	0.285655	0.712748	0.896287	0.959353	0.999565	0.998328	0.99396	1	1
1764	0.000834838	0.285786	0.712967	0.896394	0.959448	0.999569	0.998335	0.993976	1	1
1765	0.000834836	0.285918	0.713186	0.896501	0.959542	0.999572	0.998341	0.993992	1	1
1766	0.000834834	0.28605	0.713405	0.896607	0.959636	0.999576	0.998348	0.994008	1	1
1767	0.000834832	0.286181	0.713623	0.896714	0.95973	0.999579	0.998355	0.994025	1	1
1768	0.00083483	0.286313	0.713842	0.89682	0.959824	0.999583	0.998362	0.994041	1	1
1769	0.000834828	0.286445	0.71406	0.896927	0.959918	0.999586	0.998368	0.994057	1	1
1770	0.000834825	0.286576	0.714278	0.897033	0.960011	0.999589	0.998375	0.994073	1	1
1771	0.000834823	0.286708	0.714496	0.897139	0.960104	0.999593	0.998382	0.994089	1	1
1772	0.000834821	0.28684	0.714713	0.897245	0.960197	0.999596	0.998388	0.994105	1	1
1773	0.000834819	0.286971	0.714931	0.897351	0.96029	0.999599	0.998395	0.994121	1	1
1774	0.000834817	0.287103	0.715148	0.897456	0.960382	0.999602	0.998401	0.994137	1	1
1775	0.000834815	0.287234	0.715365	0.897562	0.960475	0.999606	0.998408	0.994153	1	1
1776	0.000834812	0.287366	0.715582	0.897667	0.960567	0.999609	0.998415	0.994169	1	1
1777	0.00083481	0.287497	0.715799	0.897773	0.960659	0.999612	0.998421	0.994185	1	1
1778	0.000834808	0.287629	0.716015	0.897878	0.960751	0.999615	0.998428	0.994201	1	1
1779	0.000834806	0.28776	0.716232	0.897983	0.960843	0.999618	0.998434	0.994216	1	1
1780	0.000834804	0.287892	0.716448	0.898088	0.960934	0.999621	0.998441	0.994232	1	1
1781	0.000834802	0.288023	0.716664	0.898192	0.961025	0.999625	0.998447	0.994248	1	1
1782	0.0008348	0.288155	0.71688	0.898297	0.961116	0.999628	0.998453	0.994264	1	1
1783	0.000834798	0.288286	0.717095	0.898402	0.961207	0.999631	0.99846	0.99428	1	1
1784	0.000834795	0.288418	0.717311	0.898506	0.961298	0.999634	0.998466	0.994295	1	1
1785	0.000834793	0.288549	0.717526	0.89861	0.961389	0.999637	0.998473	0.994311	1	1
1786	0.000834791	0.288681	0.717741	0.898714	0.961479	0.99964	0.998479	0.994327	1	1
1787	0.000834789	0.288812	0.717956	0.898819	0.961569	0.999643	0.998485	0.994342	1	1
1788	0.000834787	0.288943	0.718171	0.898922	0.961659	0.999645	0.998492	0.994358	1	1
1789	0.000834785	0.289075	0.718386	0.899026	0.961749	0.999648	0.998498	0.994373	1	1
1790	0.000834783	0.289206	0.7186	0.89913	0.961839	0.999651	0.998504	0.994389	1	1
1791	0.000834781	0.289338	0.718814	0.899233	0.961928	0.999654	0.99851	0.994405	1	1
1792	0.000834779	0.289469	0.719029	0.899337	0.962018	0.999657	0.998517	0.99442	1	1
1793	0.000834776	0.2896	0.719242	0.89944	0.962107	0.99966	0.998523	0.994436	1	1
1794	0.000834774	0.289732	0.719456	0.899543	0.962196	0.999663	0.998529	0.994451	1	1
1795	0.000834772	0.289863	0.71967	0.899646	0.962284	0.999665	0.998535	0.994466	1	1
1796	0.00083477	0.289994	0.719883	0.899749	0.962373	0.999668	0.998541	0.994482	1	1
1797	0.000834768	0.290125	0.720096	0.899852	0.962461	0.999671	0.998547	0.994497	1	1
1798	0.000834766	0.290257	0.720309	0.899955	0.962549	0.999674	0.998553	0.994513	1	1
1799	0.000834764	0.290388	0.720522	0.900057	0.962637	0.999676	0.99856	0.994528	1	1
1800	0.000834762	0.290519	0.720735	0.90016	0.962725	0.999679	0.998566	0.994543	1	1
1801	0.00083476	0.29065	0.720947	0.900262	0.962813	0.999682	0.998572	0.994558	1	1
1802	0.000834758	0.290782	0.72116	0.900364	0.9629	0.999684	0.998578	0.994574	1	1
1803	0.000834756	0.290913	0.721372	0.900466	0.962988	0.999687	0.998584	0.994589	1	1
1804	0.000834753	0.291044	0.721584	0.900568	0.963075	0.999689	0.99859	0.994604	1	1
1805	0.000834751	0.291175	0.721796	0.90067	0.963162	0.999692	0.998596	0.994619	1	1
1806	0.000834749	0.291306	0.722007	0.900772	0.963249	0.999695	0.998602	0.994634	1	1
1807	0.000834747	0.291438	0.722219	0.900873	0.963335	0.999697	0.998608	0.99465	1	1
1808	0.000834745	0.291569	0.72243	0.900975	0.963422	0.9997	0.998613	0.994665	1	1
1809	0.000834743	0.2917	0.722641	0.901076	0.963508	0.999702	0.998619	0.99468	1	1
1810	0.000834741	0.291831	0.722852	0.901177	0.963594	0.999705	0.998625	0.994695	1	1
1811	0.000834739	0.291962	0.723063	0.901279	0.96368	0.999707	0.998631	0.99471	1	1
1812	0.000834737	0.292093	0.723273	0.90138	0.963766	0.999709	0.998637	0.994725	1	1
1813	0.000834735	0.292224	0.723484	0.90148	0.963851	0.999712	0.998643	0.99474	1	1
1814	0.000834733	0.292355	0.723694	0.901581	0.963937	0.999714	0.998649	0.994755	1	1
1815	0.000834731	0.292486	0.723904	0.901682	0.964022	0.999717	0.998654	0.99477	1	1
1816	0.000834729	0.292617	0.724114	0.901782	0.964107	0.999719	0.99866	0.994784	1	1
1817	0.000834727	0.292748	0.724324	0.901883	0.964192	0.999721	0.998666	0.994799	1	1
1818	0.000834725	0.292879	0.724533	0.901983	0.964276	0.999724	0.998672	0.994814	1	1
1819	0.000834723	0.29301	0.724742	0.902083	0.964361	0.999726	0.998677	0.994829	1	1
1820	0.000834721	0.293141	0.724952	0.902183	0.964445	0.999728	0.998683	0.994844	1	1
1821	0.000834718	0.293272	0.725161	0.902283	0.964529	0.999731	0.998689	0.994859	1	1
1822	0.000834716	0.293403	0.725369	0.902383	0.964613	0.999733	0.998694	0.994873	1	1
1823	0.000834714	0.293534	0.725578	0.902482	0.964697	0.999735	0.9987	0.994888	1	1
1824	0.000834712	0.293665	0.725787	0.902582	0.964781	0.999737	0.998706	0.994903	1	1
1825	0.00083471	0.293796	0.725995	0.902681	0.964864	0.99974	0.998711	0.994917	1	1
1826	0.000834708	0.293927	0.726203	0.902781	0.964948	0.999742	0.998717	0.994932	1	1
1827	0.000834706	0.294058	0.726411	0.90288	0.965031	0.999744	0.998722	0.994947	1	1
1828	0.000834704	0.294189	0.726619	0.902979	0.965114	0.999746	0.998728	0.994961	1	1
1829	0.000834702	0.29432	0.726826	0.903078	0.965197	0.999748	0.998733	0.994976	1	1
1830	0.0008347	0.29445	0.727034	0.903177	0.965279	0.99975	0.998739	0.99499	1	1
1831	0.000834698	0.294581	0.727241	0.903275	0.965362	0.999752	0.998744	0.995005	1	1
1832	0.000834696	0.294712	0.727448	0.903374	0.965444	0.999755	0.99875	0.995019	1	1
1833	0.000834694	0.294843	0.727655	0.903473	0.965526	0.999757	0.998755	0.995034	1	1
1834	0.000834692	0.294974	0.727862	0.903571	0.965608	0.999759	0.998761	0.995048	1	1
1835	0.00083469	0.295105	0.728069	0.903669	0.96569	0.999761	0.998766	0.995062	1	1
1836	0.000834688	0.295235	0.728275	0.903767	0.965772	0.999763	0.998771	0.995077	1	1
1837	0.000834686	0.295366	0.728481	0.903865	0.965853	0.999765	0.998777	0.995091	1	1
1838	0.000834684	0.295497	0.728687	0.903963	0.965935	0.999767	0.998782	0.995105	1	1
1839	0.000834682	0.295628	0.728893	0.904061	0.966016	0.999769	0.998787	0.99512	1	1
1840	0.00083468	0.295758	0.729099	0.904159	0.966097	0.999771	0.998793	0.995134	1	1
1841	0.000834678	0.295889	0.729304	0.904256	0.966177	0.999773	0.998798	0.995148	1	1
1842	0.000834676	0.29602	0.72951	0.904354	0.966258	0.999775	0.998803	0.995162	1	1
1843	0.000834674	0.29615	0.729715	0.904451	0.966339	0.999777	0.998809	0.995177	1	1
1844	0.000834672	0.296281	0.72992	0.904548	0.966419	0.999778	0.998814	0.995191	1	1
1845	0.00083467	0.296412	0.730125	0.904645	0.966499	0.99978	0.998819	0.995205	1	1
1846	0.000834668	0.296542	0.73033	0.904742	0.966579	0.999782	0.998824	0.995219	1	1
1847	0.000834666	0.296673	0.730534	0.904839	0.966659	0.999784	0.99883	0.995233	1	1
1848	0.000834664	0.296804	0.730739	0.904936	0.966739	0.999786	0.998835	0.995247	1	1
1849	0.000834662	0.296934	0.730943	0.905032	0.966818	0.999788	0.99884	0.995261	1	1
1850	0.00083466	0.297065	0.731147	0.905129	0.966897	0.99979	0.998845	0.995275	1	1
1851	0.000834658	0.297196	0.731351	0.905225	0.966977	0.999791	0.99885	0.995289	1	1
1852	0.000834656	0.297326	0.731554	0.905322	0.967056	0.999793	0.998855	0.995303	1	1
1853	0.000834654	0.297457	0.731758	0.905418	0.967134	0.999795	0.99886	0.995317	1	1
1854	0.000834653	0.297587	0.731961	0.905514	0.967213	0.999797	0.998865	0.995331	1	1
1855	0.000834651	0.297718	0.732164	0.90561	0.967292	0.999798	0.99887	0.995345	1	1
1856	0.000834649	0.297848	0.732367	0.905706	0.96737	0.9998	0.998875	0.995359	1	1
1857	0.000834647	0.297979	0.73257	0.905801	0.967448	0.999802	0.998881	0.995373	1	1
1858	0.000834645	0.298109	0.732773	0.905897	0.967526	0.999804	0.998886	0.995386	1	1
1859	0.000834643	0.29824	0.732975	0.905992	0.967604	0.999805	0.998891	0.9954	1	1
1860	0.000834641	0.29837	0.733178	0.906088	0.967682	0.999807	0.998895	0.995414	1	1
1861	0.000834639	0.298501	0.73338	0.906183	0.967759	0.999809	0.9989	0.995428	1	1
1862	0.000834637	0.298631	0.733582	0.906278	0.967837	0.99981	0.998905	0.995441	1	1
1863	0.000834635	0.298762	0.733783	0.906373	0.967914	0.999812	0.99891	0.995455	1	1
1864	0.000834633	0.298892	0.733985	0.906468	0.967991	0.999814	0.998915	0.995469	1	1
1865	0.000834631	0.299023	0.734187	0.906563	0.968068	0.999815	0.99892	0.995482	1	1
1866	0.000834629	0.299153	0.734388	0.906658	0.968145	0.999817	0.998925	0.995496	1	1
1867	0.000834627	0.299283	0.734589	0.906752	0.968221	0.999818	0.99893	0.995509	1	1
1868	0.000834625	0.299414	0.73479	0.906847	0.968298	0.99982	0.998935	0.995523	1	1
1869	0.000834623	0.299544	0.734991	0.906941	0.968374	0.999821	0.998939	0.995536	1	1
1870	0.000834621	0.299674	0.735191	0.907035	0.96845	0.999823	0.998944	0.99555	1	1
1871	0.000834619	0.299805	0.735392	0.90713	0.968526	0.999825	0.998949	0.995563	1	1
1872	0.000834617	0.299935	0.735592	0.907224	0.968602	0.999826	0.998954	0.995577	1	1
1873	0.000834616	0.300065	0.735792	0.907317	0.968678	0.999828	0.998959	0.99559	1	1
1874	0.000834614	0.300196	0.735992	0.907411	0.968753	0.999829	0.998963	0.995604	1	1
1875	0.000834612	0.300326	0.736192	0.907505	0.968829	0.999831	0.998968	0.995617	1	1
1876	0.00083461	0.300456	0.736392	0.907599	0.968904	0.999832	0.998973	0.99563	1	1
1877	0.000834608	0.300587	0.736591	0.907692	0.968979	0.999833	0.998977	0.995644	1	1
1878	0.000834606	0.300717	0.73679	0.907785	0.969054	0.999835	0.998982	0.995657	1	1
1879	0.000834604	0.300847	0.736989	0.907879	0.969129	0.999836	0.998987	0.99567	1	1
1880	0.000834602	0.300977	0.737188	0.907972	0.969203	0.999838	0.998991	0.995683	1	1
1881	0.0008346	0.301108	0.737387	0.908065	0.969278	0.999839	0.998996	0.995697	1	1
1882	0.000834598	0.301238	0.737586	0.908158	0.969352	0.999841	0.999001	0.99571	1	1
1883	0.000834596	0.301368	0.737784	0.908251	0.969426	0.999842	0.999005	0.995723	1	1
1884	0.000834595	0.301498	0.737983	0.908343	0.9695	0.999843	0.99901	0.995736	1	1
1885	0.000834593	0.301628	0.738181	0.908436	0.969574	0.999845	0.999014	0.995749	1	1
1886	0.000834591	0.301758	0.738379	0.908528	0.969648	0.999846	0.999019	0.995762	1	1
1887	0.000834589	0.301889	0.738576	0.908621	0.969721	0.999847	0.999023	0.995775	1	1
1888	0.000834587	0.302019	0.738774	0.908713	0.969795	0.999849	0.999028	0.995788	1	1
1889	0.000834585	0.302149	0.738971	0.908805	0.969868	0.99985	0.999032	0.995801	1	1
1890	0.000834583	0.302279	0.739169	0.908897	0.969941	0.999851	0.999037	0.995814	1	1
1891	0.000834581	0.302409	0.739366	0.908989	0.970014	0.999853	0.999041	0.995827	1	1
1892	0.000834579	0.302539	0.739563	0.909081	0.970087	0.999854	0.999046	0.99584	1	1
1893	0.000834578	0.302669	0.73976	0.909173	0.970159	0.999855	0.99905	0.995853	1	1
1894	0.000834576	0.302799	0.739956	0.909264	0.970232	0.999857	0.999055	0.995866	1	1
1895	0.000834574	0.302929	0.740153	0.909356	0.970304	0.999858	0.999059	0.995879	1	1
1896	0.000834572	0.303059	0.740349	0.909447	0.970376	0.999859	0.999063	0.995891	1	1
1897	0.00083457	0.303189	0.740545	0.909538	0.970448	0.99986	0.999068	0.995904	1	1
1898	0.000834568	0.303319	0.740741	0.90963	0.97052	0.999862	0.999072	0.995917	1	1
1899	0.000834566	0.303449	0.740937	0.909721	0.970592	0.999863	0.999076	0.99593	1	1
1900	0.000834564	0.303579	0.741132	0.909812	0.970663	0.999864	0.999081	0.995942	1	1
1901	0.000834563	0.303709	0.741328	0.909902	0.970735	0.999865	0.999085	0.995955	1	1
1902	0.000834561	0.303839	0.741523	0.909993	0.970806	0.999866	0.999089	0.995968	1	1
1903	0.000834559	0.303969	0.741718	0.910084	0.970877	0.999868	0.999093	0.99598	1	1
1904	0.000834557	0.304099	0.741913	0.910174	0.970948	0.999869	0.999098	0.995993	1	1
1905	0.000834555	0.304229	0.742108	0.910265	0.971019	0.99987	0.999102	0.996006	1	1
1906	0.000834553	0.304359	0.742303	0.910355	0.97109	0.999871	0.999106	0.996018	1	1
1907	0.000834551	0.304489	0.742497	0.910445	0.97116	0.999872	0.99911	0.996031	1	1
1908	0.00083455	0.304619	0.742691	0.910535	0.971231	0.999873	0.999115	0.996043	1	1
1909	0.000834548	0.304749	0.742885	0.910625	0.971301	0.999874	0.999119	0.996056	1	1
1910	0.000834546	0.304879	0.743079	0.910715	0.971371	0.999876	0.999123	0.996068	1	1
1911	0.000834544	0.305009	0.743273	0.910805	0.971441	0.999877	0.999127	0.996081	1	1
1912	0.000834542	0.305138	0.743467	0.910895	0.971511	0.999878	0.999131	0.996093	1	1
1913	0.00083454	0.305268	0.74366	0.910984	0.971581	0.999879	0.999135	0.996105	1	1
1914	0.000834538	0.305398	0.743854	0.911074	0.97165	0.99988	0.999139	0.996118	1	1
1915	0.000834537	0.305528	0.744047	0.911163	0.97172	0.999881	0.999143	0.99613	1	1
1916	0.000834535	0.305658	0.74424	0.911253	0.971789	0.999882	0.999148	0.996142	1	1
1917	0.000834533	0.305787	0.744433	0.911342	0.971858	0.999883	0.999152	0.996155	1	1
1918	0.000834531	0.305917	0.744625	0.911431	0.971927	0.999884	0.999156	0.996167	1	1
1919	0.000834529	0.306047	0.744818	0.91152	0.971996	0.999885	0.99916	0.996179	1	1
1920	0.000834527	0.306177	0.74501	0.911609	0.972064	0.999886	0.999164	0.996191	1	1
1921	0.000834526	0.306306	0.745202	0.911697	0.972133	0.999887	0.999168	0.996203	1	1
1922	0.000834524	0.306436	0.745394	0.911786	0.972201	0.999888	0.999172	0.996216	1	1
1923	0.000834522	0.306566	0.745586	0.911874	0.97227	0.999889	0.999176	0.996228	1	1
1924	0.00083452	0.306696	0.745778	0.911963	0.972338	0.99989	0.99918	0.99624	1	1
1925	0.000834518	0.306825	0.745969	0.912051	0.972406	0.999891	0.999184	0.996252	1	1
1926	0.000834516	0.306955	0.746161	0.912139	0.972473	0.999892	0.999187	0.996264	1	1
1927	0.000834515	0.307085	0.746352	0.912228	0.972541	0.999893	0.999191	0.996276	1	1
1928	0.000834513	0.307214	0.746543	0.912316	0.972609	0.999894	0.999195	0.996288	1	1
1929	0.000834511	0.307344	0.746734	0.912403	0.972676	0.999895	0.999199	0.9963	1	1
1930	0.000834509	0.307474	0.746925	0.912491	0.972743	0.999896	0.999203	0.996312	1	1
1931	0.000834507	0.307603	0.747115	0.912579	0.97281	0.999897	0.999207	0.996324	1	1
1932	0.000834506	0.307733	0.747306	0.912667	0.972877	0.999898	0.999211	0.996336	1	1
1933	0.000834504	0.307862	0.747496	0.912754	0.972944	0.999899	0.999214	0.996347	1	1
1934	0.000834502	0.307992	0.747686	0.912841	0.973011	0.9999	0.999218	0.996359	1	1
1935	0.0008345	0.308122	0.747876	0.912929	0.973078	0.999901	0.999222	0.996371	1	1
1936	0.000834498	0.308251	0.748065	0.913016	0.973144	0.999901	0.999226	0.996383	1	1
1937	0.000834497	0.308381	0.748255	0.913103	0.97321	0.999902	0.99923	0.996395	1	1
1938	0.000834495	0.30851	0.748444	0.91319	0.973276	0.999903	0.999233	0.996406	1	1
1939	0.000834493	0.30864	0.748634	0.913277	0.973342	0.999904	0.999237	0.996418	1	1
1940	0.000834491	0.308769	0.748823	0.913364	0.973408	0.999905	0.999241	0.99643	1	1
1941	0.000834489	0.308899	0.749012	0.91345	0.973474	0.999906	0.999244	0.996441	1	1
1942	0.000834488	0.309028	0.749201	0.913537	0.97354	0.999907	0.999248	0.996453	1	1
1943	0.000834486	0.309158	0.749389	0.913623	0.973605	0.999907	0.999252	0.996465	1	1
1944	0.000834484	0.309287	0.749578	0.91371	0.97367	0.999908	0.999255	0.996476	1	1
1945	0.000834482	0.309417	0.749766	0.913796	0.973736	0.999909	0.999259	0.996488	1	1
1946	0.000834481	0.309546	0.749954	0.913882	0.973801	0.99991	0.999263	0.996499	1	1
1947	0.000834479	0.309676	0.750142	0.913968	0.973865	0.999911	0.999266	0.996511	1	1
1948	0.000834477	0.309805	0.75033	0.914054	0.97393	0.999912	0.99927	0.996522	1	1
1949	0.000834475	0.309934	0.750517	0.91414	0.973995	0.999912	0.999274	0.996534	1	1
1950	0.000834473	0.310064	0.750705	0.914226	0.974059	0.999913	0.999277	0.996545	1	1
1951	0.000834472	0.310193	0.750892	0.914312	0.974124	0.999914	0.999281	0.996557	1	1
1952	0.00083447	0.310323	0.751079	0.914397	0.974188	0.999915	0.999284	0.996568	1	1
1953	0.000834468	0.310452	0.751266	0.914483	0.974252	0.999916	0.999288	0.996579	1	1
1954	0.000834466	0.310581	0.751453	0.914568	0.974316	0.999916	0.999291	0.996591	1	1
1955	0.000834465	0.310711	0.75164	0.914653	0.97438	0.999917	0.999295	0.996602	1	1
1956	0.000834463	0.31084	0.751827	0.914738	0.974444	0.999918	0.999298	0.996613	1	1
1957	0.000834461	0.310969	0.752013	0.914824	0.974507	0.999919	0.999302	0.996624	1	1
1958	0.000834459	0.311099	0.752199	0.914908	0.974571	0.999919	0.999305	0.996636	1	1
1959	0.000834458	0.311228	0.752385	0.914993	0.974634	0.99992	0.999309	0.996647	1	1
1960	0.000834456	0.311357	0.752571	0.915078	0.974697	0.999921	0.999312	0.996658	1	1
1961	0.000834454	0.311486	0.752757	0.915163	0.97476	0.999921	0.999316	0.996669	1	1
1962	0.000834452	0.311616	0.752942	0.915247	0.974823	0.999922	0.999319	0.99668	1	1
1963	0.000834451	0.311745	0.753128	0.915332	0.974886	0.999923	0.999322	0.996691	1	1
1964	0.000834449	0.311874	0.753313	0.915416	0.974948	0.999924	0.999326	0.996703	1	1
1965	0.000834447	0.312003	0.753498	0.915501	0.975011	0.999924	0.999329	0.996714	1	1
1966	0.000834445	0.312133	0.753683	0.915585	0.975073	0.999925	0.999333	0.996725	1	1
1967	0.000834444	0.312262	0.753868	0.915669	0.975136	0.999926	0.999336	0.996736	1	1
1968	0.000834442	0.312391	0.754053	0.915753	0.975198	0.999926	0.999339	0.996747	1	1
1969	0.00083444	0.31252	0.754237	0.915837	0.97526	0.999927	0.999343	0.996758	1	1
1970	0.000834438	0.312649	0.754421	0.91592	0.975321	0.999928	0.999346	0.996768	1	1
1971	0.000834437	0.312778	0.754606	0.916004	0.975383	0.999928	0.999349	0.996779	1	1
1972	0.000834435	0.312908	0.75479	0.916088	0.975445	0.999929	0.999352	0.99679	1	1
1973	0.000834433	0.313037	0.754973	0.916171	0.975506	0.99993	0.999356	0.996801	1	1
1974	0.000834431	0.313166	0.755157	0.916255	0.975568	0.99993	0.999359	0.996812	1	1
1975	0.00083443	0.313295	0.755341	0.916338	0.975629	0.999931	0.999362	0.996823	1	1
1976	0.000834428	0.313424	0.755524	0.916421	0.97569	0.999932	0.999365	0.996833	1	1
1977	0.000834426	0.313553	0.755707	0.916504	0.975751	0.999932	0.999369	0.996844	1	1
1978	0.000834425	0.313682	0.75589	0.916587	0.975812	0.999933	0.999372	0.996855	1	1
1979	0.000834423	0.313811	0.756073	0.91667	0.975872	0.999933	0.999375	0.996866	1	1
1980	0.000834421	0.31394	0.756256	0.916753	0.975933	0.999934	0.999378	0.996876	1	1
1981	0.000834419	0.314069	0.756438	0.916836	0.975993	0.999935	0.999381	0.996887	1	1
1982	0.000834418	0.314198	0.756621	0.916918	0.976054	0.999935	0.999384	0.996898	1	1
1983	0.000834416	0.314327	0.756803	0.917001	0.976114	0.999936	0.999388	0.996908	1	1
1984	0.000834414	0.314456	0.756985	0.917083	0.976174	0.999936	0.999391	0.996919	1	1
1985	0.000834413	0.314585	0.757167	0.917166	0.976234	0.999937	0.999394	0.996929	1	1
1986	0.000834411	0.314714	0.757349	0.917248	0.976293	0.999938	0.999397	0.99694	1	1
1987	0.000834409	0.314843	0.757531	0.91733	0.976353	0.999938	0.9994	0.99695	1	1
1988	0.000834407	0.314972	0.757712	0.917412	0.976413	0.999939	0.999403	0.996961	1	1
1989	0.000834406	0.315101	0.757894	0.917494	0.976472	0.999939	0.999406	0.996971	1	1
1990	0.000834404	0.31523	0.758075	0.917576	0.976531	0.99994	0.999409	0.996982	1	1
1991	0.000834402	0.315359	0.758256	0.917658	0.976591	0.99994	0.999412	0.996992	1	1
1992	0.000834401	0.315488	0.758437	0.917739	0.97665	0.999941	0.999415	0.997002	1	1
1993	0.000834399	0.315617	0.758617	0.917821	0.976709	0.999942	0.999418	0.997013	1	1
1994	0.000834397	0.315746	0.758798	0.917903	0.976767	0.999942	0.999421	0.997023	1	1
1995	0.000834396	0.315875	0.758978	0.917984	0.976826	0.999943	0.999424	0.997033	1	1
1996	0.000834394	0.316004	0.759159	0.918065	0.976884	0.999943	0.999427	0.997044	1	1
1997	0.000834392	0.316132	0.759339	0.918146	0.976943	0.999944	0.99943	0.997054	1	1
1998	0.000834391	0.316261	0.759519	0.918228	0.977001	0.999944	0.999433	0.997064	1	1
1999	0.000834389	0.31639	0.759698	0.918309	0.977059	0.999945	0.999436	0.997074	1	1
[truncated: 1 more rows]

[truncated: 2 more sheets: S6b.PowerDownSampling, S7.OtherStudies]
